# Supplementary material for: Acute paediatric asthma treatment in the prehospital setting: a retrospective observational study
Source: PubMed Central journal article supplement — BMJ Open. 2023 Jun 22;13(6):e073029. doi: 10.1136/bmjopen-2023-073029 (PMC10314617; doi:10.1136/bmjopen-2023-073029), 2023-06-22
Supplement: bmjopen-2023-073029.draft_revisions.pdf [file bmjopen-2023-073029.draft_revisions.pdf]

# BMJ Open

BMJ Open is committed to open peer review. As part of this commitment we make the peer review history of every article we publish publicly available.

When an article is published we post the peer reviewers' comments and the authors' responses online. We also post the versions of the paper that were used during peer review. These are the versions that the peer review comments apply to.

The versions of the paper that follow are the versions that were submitted during the peer review process. They are not the versions of record or the final published versions. They should not be cited or distributed as the published version of this manuscript.

BMJ Open is an open access journal and the full, final, typeset and author-corrected version of record of the manuscript is available on our site with no access controls, subscription charges or pay-per-view fees (<http://bmjopen.bmj.com>).

If you have any questions on BMJ Open's open peer review process please email [info.bmjopen@bmj.com](mailto:info.bmjopen@bmj.com)

# BMJ Open

## Escalation of care for treatment of acute asthma in children is rare in the pre-hospital setting. A retrospective observational study.

|                               |                                                                                                                                                                                                                                                                                                                                                                                                                                                                                                                                                                                                                                                                                                                                                                                                                                                                                                                                                                                                                                                                                                                                                                                                                            |
|-------------------------------|----------------------------------------------------------------------------------------------------------------------------------------------------------------------------------------------------------------------------------------------------------------------------------------------------------------------------------------------------------------------------------------------------------------------------------------------------------------------------------------------------------------------------------------------------------------------------------------------------------------------------------------------------------------------------------------------------------------------------------------------------------------------------------------------------------------------------------------------------------------------------------------------------------------------------------------------------------------------------------------------------------------------------------------------------------------------------------------------------------------------------------------------------------------------------------------------------------------------------|
| Journal:                      | <i>BMJ Open</i>                                                                                                                                                                                                                                                                                                                                                                                                                                                                                                                                                                                                                                                                                                                                                                                                                                                                                                                                                                                                                                                                                                                                                                                                            |
| Manuscript ID                 | bmjopen-2023-073029                                                                                                                                                                                                                                                                                                                                                                                                                                                                                                                                                                                                                                                                                                                                                                                                                                                                                                                                                                                                                                                                                                                                                                                                        |
| Article Type:                 | Original research                                                                                                                                                                                                                                                                                                                                                                                                                                                                                                                                                                                                                                                                                                                                                                                                                                                                                                                                                                                                                                                                                                                                                                                                          |
| Date Submitted by the Author: | 21-Feb-2023                                                                                                                                                                                                                                                                                                                                                                                                                                                                                                                                                                                                                                                                                                                                                                                                                                                                                                                                                                                                                                                                                                                                                                                                                |
| Complete List of Authors:     | <p>Craig, Simon; Monash Medical Centre Clayton, Paediatric Emergency Department; Monash University Department of Paediatrics<br/>         Delardes, Belinda; Ambulance Victoria; Monash University Department of Paramedicine<br/>         Nehme, Ziad; Ambulance Victoria, Research &amp; Evaluation; Monash University School of Public Health and Preventive Medicine<br/>         Wilson, Catherine; Murdoch Childrens Research Institute, Emergency Medicine Research Group; PREDICT, Research Group<br/>         Dalziel, Stuart; Starship Children's Health, Emergency Department; The University of Auckland Faculty of Medical and Health Sciences, Paediatrics and Surgery<br/>         Nixon, Gillian; Monash University Department of Paediatrics; Monash Children's Hospital, Respiratory Medicine<br/>         Powell, Colin; Sidra Medical and Research Center, Department of Emergency Medicine; Cardiff School of Health Sciences<br/>         Graudins, Andis; Monash Health, Dandenong Emergency Department; Monash University<br/>         Babl, Franz; Royal Childrens Hospital, Emergency Department; The University of Melbourne Faculty of Medicine Dentistry and Health Sciences, Paediatrics</p> |
| Keywords:                     | Asthma < THORACIC MEDICINE, ACCIDENT & EMERGENCY MEDICINE, Paediatric A&E and ambulatory care < PAEDIATRICS                                                                                                                                                                                                                                                                                                                                                                                                                                                                                                                                                                                                                                                                                                                                                                                                                                                                                                                                                                                                                                                                                                                |
|                               |                                                                                                                                                                                                                                                                                                                                                                                                                                                                                                                                                                                                                                                                                                                                                                                                                                                                                                                                                                                                                                                                                                                                                                                                                            |

SCHOLARONE™  
Manuscripts

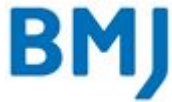

I, the Submitting Author has the right to grant and does grant on behalf of all authors of the Work (as defined in the below author licence), an exclusive licence and/or a non-exclusive licence for contributions from authors who are: i) UK Crown employees; ii) where BMJ has agreed a CC-BY licence shall apply, and/or iii) in accordance with the terms applicable for US Federal Government officers or employees acting as part of their official duties; on a worldwide, perpetual, irrevocable, royalty-free basis to BMJ Publishing Group Ltd ("BMJ") its licensees and where the relevant Journal is co-owned by BMJ to the co-owners of the Journal, to publish the Work in this journal and any other BMJ products and to exploit all rights, as set out in our [licence](#).

The Submitting Author accepts and understands that any supply made under these terms is made by BMJ to the Submitting Author unless you are acting as an employee on behalf of your employer or a postgraduate student of an affiliated institution which is paying any applicable article publishing charge ("APC") for Open Access articles. Where the Submitting Author wishes to make the Work available on an Open Access basis (and intends to pay the relevant APC), the terms of reuse of such Open Access shall be governed by a Creative Commons licence – details of these licences and which [Creative Commons](#) licence will apply to this Work are set out in our licence referred to above.

Other than as permitted in any relevant BMJ Author's Self Archiving Policies, I confirm this Work has not been accepted for publication elsewhere, is not being considered for publication elsewhere and does not duplicate material already published. I confirm all authors consent to publication of this Work and authorise the granting of this licence.

1  
2  
3 **Escalation of care for treatment of acute asthma in children is rare in the pre-hospital**  
4 **setting.**  
5  
6  
7  
8  
9

10 **Simon Craig**<sup>1,2,3</sup> MBBS FACEM MPH MHPE, **Belinda Delardes**<sup>4,5</sup> B Paramedic (Hons), **Ziad**  
11 **Nehme**<sup>4,5,6</sup> PhD, **Catherine L Wilson**<sup>3</sup> Dip App Sci Nurs MPH Ms Evaluation and Assessment,  
12 **Stuart R Dalziel**<sup>7,8</sup> MBChB FRACP PhD, **Gillian M Nixon**<sup>1,9</sup> MBChB MD FRACP, **Colin VE**  
13 **Powell**<sup>10,11</sup> MBChB DCH MRCP(UK) FRACP FRCPC MD, **Andis Gaudins**<sup>12,13,14</sup> MBBS PhD  
14 **FACEM FACMT, Franz E Babl**<sup>3,15,16,17</sup> MD MPH DMedSc FRACP FAAP FACEP on behalf of the  
15 **PREDICT Network.**  
16  
17  
18  
19  
20  
21  
22  
23  
24  
25  
26  
27  
28  
29

### 30 **Affiliations**

- 31  
32 1. Department of Paediatrics, School of Clinical Sciences at Monash Health, Monash  
33 University, Victoria, Australia.
- 34  
35 2. Monash Emergency Program, Paediatric Emergency Department, Monash Medical  
36 Centre, Monash Health, Victoria, Australia.
- 37  
38 3. Emergency Research, Clinical Sciences, Murdoch Children's Research Institute,  
39 Victoria, Australia
- 40  
41 4. Ambulance Victoria, Blackburn North, Victoria, Australia
- 42  
43 5. Department of Paramedicine, Monash University, Frankston, Victoria, Australia
- 44  
45 6. School of Public Health and Preventive Medicine, Monash University, Melbourne,  
46 Victoria, Australia
- 47  
48 7. Departments of Surgery and Paediatrics: Child and Youth Health, The University of  
49 Auckland, New Zealand.
- 50  
51  
52  
53  
54  
55  
56  
57  
58  
59  
60

- 1
  - 2
  - 3
  - 4
  - 5
  - 6
  - 7
  - 8
  - 9
  - 10
  - 11
  - 12
  - 13
  - 14
  - 15
  - 16
  - 17
  - 18
  - 19
  - 20
  - 21
  - 22
  - 23
  - 24
  - 25
  - 26
  - 27
  - 28
  - 29
  - 30
  - 31
  - 32
  - 33
  - 34
  - 35
  - 36
  - 37
  - 38
  - 39
  - 40
  - 41
  - 42
  - 43
  - 44
  - 45
  - 46
  - 47
  - 48
  - 49
  - 50
  - 51
  - 52
  - 53
  - 54
  - 55
  - 56
  - 57
  - 58
  - 59
  - 60
8. Children's Emergency Department, Starship Children's Hospital, Auckland, New Zealand
9. Department of Respiratory Medicine, Monash Children's Hospital, Melbourne, Victoria, Australia.
10. Division of Population Medicine, School of Medicine, Cardiff, United Kingdom.
11. Emergency Medicine, Sidra Medicine, Doha Qatar
12. Department of Medicine, School of Clinical Sciences at Monash Health, Monash University, Victoria, Australia.
13. Monash Emergency Program, Monash Health, Dandenong Hospital, Victoria, Australia.
14. Monash Health Clinical Toxicology and Addiction Medicine Service, Monash Health, Dandenong Hospital, Victoria, Australia.
15. Department of Emergency Medicine, The Royal Children's Hospital, Victoria, Australia.
16. Department of Paediatrics, Faculty of Medicine, Dentistry and Health Sciences, University of Melbourne, Victoria, Australia.
17. Department of Critical Care, Faculty of Medicine, Dentistry and Health Sciences, University of Melbourne, Victoria, Australia.

Abstract 270 words (max 300)

Main text 2273 words (max 3000)

27 references (max 30)

2 tables, 2 figures, 1 box (up to 6 total)

1  
2  
3  
4  
5  
6  
7  
8  
9  
10  
11 Corresponding author  
12

13 Prof Simon Craig  
14

- 15 - Paediatric Emergency Department, Monash Medical Centre, Monash Health, Clayton,  
16  
17 Victoria, Australia  
18
- 19 - Department of Paediatrics, Monash University, Clayton, Victoria, Australia  
20  
21

22 [Simon.Craig@monash.edu](mailto:Simon.Craig@monash.edu)  
23  
24  
25  
26  
27  
28  
29  
30  
31  
32  
33  
34  
35  
36  
37  
38  
39  
40  
41  
42  
43  
44  
45  
46  
47  
48  
49  
50  
51  
52  
53  
54  
55  
56  
57  
58  
59  
60

## Background

Asthma is a common reason for ambulance paramedic attendance for children, however, there are little data available on pre-hospital treatment patterns or outcomes. This study aimed to understand the incidence of and patterns of “escalated care” (care in addition to standard treatment with systemic corticosteroids and inhaled bronchodilators).

## Methods

We conducted a retrospective observational study of state-wide ambulance service data (Ambulance Victoria in Victoria, Australia, population 6.5 million). Children aged 1-17 years and given a final diagnosis of asthma by the treating paramedics and/or treated with inhaled bronchodilators from 1 July 2019 to 30 June 2020 were analysed for demographic and clinical features, and treatment administered. We classified “escalation of care” as parenteral administration of adrenaline, or provision of respiratory support. We compared clinical, demographic and treatment administered between those receiving and not receiving escalation of care.

## Results

Paramedics attended 1,572 children with acute exacerbations of asthma during the 1 year study period. Of these, 22 (1.4%) had escalated care, all receiving parenteral adrenaline.

Patients with escalated care were more likely to be older, had previously required hospital admission for asthma and had severe respiratory distress at initial assessment.

Of 1307 children with respiratory status data available, at arrival to hospital the respiratory status of children had improved overall (normal/mild respiratory distress at initial assessment 847 (64.8%), normal/mild respiratory distress at hospital arrival 1142 (87.4%),  $p < 0.0001$ ).

## Conclusion

Most children with acute exacerbations of asthma did not receive escalated therapy during their pre-hospital treatment from ambulance paramedics. Most patients were treated with inhaled bronchodilators only and clinically improved by the time they arrived in hospital.

**What is already known on this topic** – An acute exacerbation of asthma is a common reason for ambulance paramedic attendance for children, however, there is little data available on treatment patterns or pre-hospital outcomes.

**What this study adds** – Most children with acute exacerbations of asthma do not receive escalated therapy (treatment beyond systemic corticosteroids and inhaled bronchodilators) during their pre-hospital treatment from ambulance paramedics. Most patients were treated with inhaled bronchodilators only and clinically improved by the time they arrived in hospital.

**How this study might affect research, practice or policy** – Due to the very low incidence of treatment escalation or clinical deterioration, any comparative clinical trials to determine the superiority of one parenteral bronchodilator over another should be reserved for the in-hospital rather than pre-hospital setting.



## **Introduction**

Asthma is a frequent reason for children to attend the emergency department (ED),<sup>1,2</sup> and one of the most common reasons for paediatric hospitalization after an ED visit.<sup>3</sup> In the USA, the rate of paediatric ED visits for asthma increased by 13.3% between 2001 and 2010,<sup>4</sup> while in the United Kingdom, it is estimated that a child is admitted to hospital with an asthma attack every 20 minutes.<sup>5</sup>

Most children with asthma have mild or moderate exacerbations, and respond to first-line treatment with inhaled bronchodilator therapy and systemic steroids.<sup>6-9</sup> However, some children with severe asthma require more intensive therapies including intravenous (IV) medications, endotracheal intubation and/or admission to intensive care.<sup>9-11</sup> Management of acute severe asthma is complicated by a number of problems, including a large number of treatment options, wide variation in self-reported and actual physician practice,<sup>12-15</sup> and a weak evidence base.<sup>16,17</sup>

Early initiation of therapy in the pre-hospital setting may abort an asthma attack and prevent further escalation on arrival to the ED. This in turn may prevent the need for more invasive treatment and potential complications or side effects of medications used in escalation. The introduction of a new treatment protocol emphasizing early use of systemic corticosteroids in a large Emergency Medical Services system was associated with reduced rates of hospitalization, less need for critical care and shortened hospital length of stay.<sup>18</sup> Systemic corticosteroid administration has been the subject of successful improvement projects in the pre-hospital setting.<sup>19</sup> However, a separate study identified high rates of paramedic non-compliance with pre-hospital treatment protocols recommending parenteral adrenaline for children with high-severity respiratory distress.<sup>20</sup>

1  
2  
3 There are little data available on treatment patterns or pre-hospital outcomes for children  
4 with acute asthma in the Australian setting. This study aimed to extract information from the  
5 electronic medical records of Ambulance Victoria (AV), Australia, on all children treated for  
6 asthma to understand the incidence of and patterns of “escalated” care (care in addition to  
7 standard treatment with systemic corticosteroids and inhaled bronchodilators).  
8  
9  
10  
11  
12  
13  
14  
15  
16  
17

## 18 **Methods**

### 19 ***Study design***

20 This was a retrospective cohort study of all children who were either given a final diagnosis  
21 of asthma by the treating AV paramedics or treated with inhaled bronchodilators from 1 July  
22 2019 to 30 June 2020. The project is reported according to the Strengthening the Reporting  
23 of Observational Studies in Epidemiology (STROBE) statement.<sup>21</sup>  
24  
25  
26  
27  
28  
29  
30  
31  
32  
33  
34

### 35 ***Study setting***

36 AV is the single public emergency medical service for the state of Victoria, Australia  
37 (population of 6.5 million over 227,000 square kilometres).  
38  
39

40 AV clinical practice guidelines<sup>22</sup> provide recommendations for asthma management according  
41 to severity (Box 1), which include: inhaled salbutamol via a pressurised metered dose inhaler  
42 (pMDI) as initial treatment for mild / moderate asthma; nebulised salbutamol and  
43 ipratropium reserved for severe or critical illness, or failure of moderate asthma to respond  
44 to treatment after 20 minutes; corticosteroids (intravenous or oral dexamethasone) for  
45 critical asthma in children and for severe and critical asthma in adults; parenteral adrenaline  
46 (intramuscular, intravenous infusion or titrated boluses) for critical asthma; and assisted  
47 ventilation and/or intubation for unconsciousness or respiratory arrest. Children aged 12  
48  
49  
50  
51  
52  
53  
54  
55  
56  
57  
58  
59  
60

1  
2  
3 years or more are managed according to an “adult” algorithm, which has a lower threshold  
4  
5 for corticosteroids compared to the paediatric algorithm (recommended for all severe cases,  
6  
7 rather than only in critical illness) .<sup>22</sup>  
8  
9

### 10 11 12 13 ***Selection of participants.*** 14

15 We searched the AV electronic patient care system for presentations of children aged more  
16  
17 than one year and less than 18 years matching the following criteria: final primary assessment  
18  
19 of asthma or cough or shortness of breath. We excluded children with a paramedic diagnosis  
20  
21 of cough or shortness of breath if they were not administered any inhaled bronchodilator  
22  
23 (salbutamol or ipratropium). Records of cases assessed by multiple ambulance teams during  
24  
25 the same incident were unified as a single paramedic attendance. Interhospital transports  
26  
27 and patients managed for cardiac arrest were excluded.  
28  
29  
30  
31  
32  
33  
34

### 35 ***Data collection*** 36

37 Data were extracted directly from the AV medical record database into a purpose-designed  
38  
39 spreadsheet and analysed.  
40

41 We defined “respiratory support” as the use of continuous positive airway pressure (CPAP),  
42  
43 bi-level positive airway pressure (BiPAP), assisted ventilation, intubation and mechanical  
44  
45 ventilation, or application of a bag-valve-mask device.  
46  
47

48 We defined “escalation” of care as parenteral administration of adrenaline, or provision of  
49  
50 respiratory support. Although AV protocols recommend oral (or parenteral) corticosteroids  
51  
52 for severe and critical asthma, corticosteroids are usually considered part of routine asthma  
53  
54 care (rather than reserved for critical illness). We did not include nebulised adrenaline for  
55  
56 suspected croup / upper airway obstruction. The case notes were reviewed and verified by a  
57  
58  
59  
60

1  
2  
3 second paramedic abstractor (BD) for all patients where escalation was identified through  
4  
5  
6 electronic medical record data.  
7  
8  
9

### 10 **Analysis**

11  
12 Descriptive statistics were used to summarise patient characteristics, clinical features and  
13  
14  
15 treatments administered. Non-parametric data is reported using median and interquartile  
16  
17  
18 range (IQR), while categorical data is presented as count and percentage. We did not impute  
19  
20  
21 any missing data.

22  
23 Comparisons were made between those requiring escalation of care to those not requiring  
24  
25  
26 escalation of care. Categorical data is compared using Chi-square test or Fisher's exact test as  
27  
28  
29 appropriate. Non-parametric data is compared using Mann-Whitney U test.

30  
31 All analyses were performed using SPSS for Windows (IBM Corp. Released 2021. IBM SPSS  
32  
33  
34 Statistics for Windows, Version 28.0. Armonk, NY: IBM Corp.).  
35  
36

### 37 **Patient and public involvement**

38  
39  
40 Patients were not involved in the design of this study.  
41  
42  
43  
44

### 45 **Results**

46  
47 Over the study period, the service responded to 633,950 on-road emergency cases,<sup>23</sup> mainly  
48  
49  
50 using advanced life support (ALS) or mobile intensive care ambulance (MICA) paramedics. We  
51  
52  
53 identified 3,587 children who had been assessed by AV with a primary assessment diagnosis  
54  
55  
56 of asthma, cough, or shortness of breath, 1,520 were excluded, leaving 1,572 children  
57  
58  
59 managed by AV with asthma (figure 1).  
60

1  
2  
3 The median age of the cohort was 6 years (IQR 4-10 years) and 888 (56.5%) were male. Most  
4 (87.6%) patients had a documented past history of asthma, 115 (7.3%) had been hospitalised,  
5  
6 63 (4%) had required intensive care admission, and 19 (1.2%) had been intubated for a  
7  
8 previous asthma exacerbation. The median initial respiratory rate was 32 breaths/minute  
9  
10 (IQR 24 – 40 breaths/minute). Of the 1,460 patients who had initial work of breathing  
11  
12 documented, 978 (67.0%) had normal or mild work of breathing, and 166 (7.7%) had severe  
13  
14 work of breathing.  
15  
16  
17  
18  
19

20 Ambulance response time was a median of 11.9 minutes (IQR 8.2 to 15.2 minutes);  
21  
22 paramedics were on the scene with the patient for a median of 17 minutes (IQR 12.7 to 25.1  
23  
24 minutes). Patients were transported by ambulance in 90% (n=1419) of attendances.  
25  
26

27 Paramedics administered inhaled bronchodilators in 946 (60.2%) of cases. Of those, 493  
28  
29 (52.1%) received salbutamol alone, 13 (1.4%) received ipratropium alone, and 440 (46.5%)  
30  
31 received salbutamol and ipratropium. For those receiving bronchodilators, a median (IQR) of  
32  
33 1 (1-2) doses was administered. Oxygen administration was documented in 306 (19.4%)  
34  
35 patients, most commonly by nebuliser mask, nasal cannulae, or an oxygen mask; however,  
36  
37 514 (32.6%) received nebulised medication, driven by oxygen. Oral corticosteroids were  
38  
39 administered to 141 (9.0%) patients.  
40  
41  
42  
43

44 Twenty-six records were reviewed for escalation of care; in four patients the electronic record  
45  
46 was incorrectly coded, due to inadvertent selection of intravenous salbutamol (used by AV  
47  
48 for pre-term labour) instead of nebulised salbutamol, leaving 22 (1.4%) patients with  
49  
50 escalated care (figure 1). Patients with escalated care were more likely to be older, had  
51  
52 previously required hospital admission for asthma and had severe respiratory distress at  
53  
54 initial assessment (Table 1). Those receiving escalated care were more likely to be treated  
55  
56 with inhaled bronchodilators, corticosteroids and oxygen (Table 2).  
57  
58  
59  
60

1  
2  
3 All patients who received escalated care received parenteral adrenaline. No patients received  
4 non-invasive ventilation, assisted ventilation or intubation. Four children (aged two, fourteen,  
5 sixteen and seventeen years) received an adrenaline infusion. One patient who received IM  
6 adrenaline also had a bag-valve-mask applied, however, did not receive positive pressure  
7 ventilation. They were a two-year-old child who had difficulty breathing and cough that was  
8 not improving with salbutamol administered at home. They became unresponsive after a  
9 coughing episode and bystander cardiopulmonary resuscitation was initiated. They were  
10 breathing spontaneously and responsive upon initial paramedic assessment.  
11  
12

13 Reports of respiratory status at initial assessment and hospital arrival were available for 1307  
14 (85.5%) of the cohort. On arrival to hospital the respiratory status of children had improved  
15 overall (normal/mild respiratory distress at initial assessment 847 (64.8%), normal/mild  
16 respiratory distress at hospital arrival 1142 (87.4%),  $p < 0.0001$ ). One hundred and thirty-one  
17 (81.2%) of the 160 children with severe respiratory distress at initial assessment had  
18 improved. Of the 847 children with normal/mild respiratory distress at initial assessment, only  
19 24 (2.8%) were documented as having moderate or severe respiratory distress at hospital  
20 arrival; and only 9 (0.8%) of the 1146 children with normal/mild/moderate respiratory  
21 distress at initial assessment were documented as having severe respiratory distress at  
22 hospital arrival (Figure 2).  
23  
24  
25  
26  
27  
28  
29  
30  
31  
32  
33  
34  
35  
36  
37  
38  
39  
40  
41  
42  
43  
44  
45  
46  
47  
48  
49

## 50 **Discussion.**

51 This study provides a population-based state-wide assessment of pre-hospital asthma  
52 management in children. Most children with acute exacerbations of asthma in Victoria,  
53 Australia, did not receive escalated therapy during their pre-hospital treatment from  
54  
55  
56  
57  
58  
59  
60

1  
2  
3 ambulance paramedics. Overall, the respiratory status of children improved from ambulance  
4 arrival to hospital arrival in all severity categories.  
5  
6

7  
8 The overall rate of parenteral bronchodilator (adrenaline) administration was 1.6%. No  
9 patients received non-invasive ventilation, assisted ventilation or intubation, and most  
10 patients were treated with inhaled bronchodilators and clinically improved by the time they  
11 arrived in hospital. Those receiving escalated care were older, were more likely to have a  
12 history of asthma requiring hospital admission and/or intubation and have severe respiratory  
13 distress on ambulance arrival.  
14  
15

16  
17 A recent large study described in-hospital management of acute asthma exacerbations in  
18 Australia and New Zealand. In 14,029 children, there was a higher overall rates of escalated  
19 therapy (7.3% overall, with 4.2% receiving parenteral bronchodilators and 4.3% respiratory  
20 support).<sup>24</sup> A common indication for escalation of care is failure to adequately respond to  
21 first-line therapy. The relatively low rates of treatment escalation in the pre-hospital setting  
22 (1.6%) suggests that a small proportion of children are seriously ill, while most are early in  
23 their treatment, and may not have had sufficient time to demonstrate improvement (or lack  
24 of improvement) prior to hospital arrival.  
25  
26

27  
28 There is little evidence to guide escalated therapy for asthma. A recent Overview of Cochrane  
29 reviews of clinical trials on escalated therapy for asthma<sup>16</sup> assessed the evidence for  
30 parenteral bronchodilators, Heliox, respiratory support and inhaled magnesium. The review  
31 found that the majority of comparisons involved between one and three trials and fewer than  
32 100 participants, making it difficult to assess the balance between benefits and potential  
33 harms. The authors were unable to make firm practice recommendations.<sup>16</sup>  
34  
35

36  
37 There is little evidence to support intramuscular adrenaline as first-line treatment for  
38 seriously ill children with asthma,<sup>25</sup> although it has a number of advantages, including ease of  
39  
40  
41  
42  
43  
44  
45  
46  
47  
48  
49  
50  
51  
52  
53  
54  
55  
56  
57  
58  
59  
60

1  
2  
3 administration and paramedic familiarity. Parenteral adrenaline is also used for anaphylaxis,  
4  
5 cardiac arrest, and management of hypotension, while nebulised adrenaline is used for severe  
6  
7 upper airway obstruction in croup. In addition, it can be easily and rapidly administered as  
8  
9 there is no need for dilution prior to administration, and no requirement for a prolonged  
10  
11 infusion.<sup>22</sup>  
12  
13

14  
15 Pre-hospital treatment of asthma rarely results in escalation of therapy beyond inhaled  
16  
17 bronchodilators and systemic corticosteroids. In addition, the use of parenteral  
18  
19 bronchodilators is often reserved for those who do not improve after initial inhaled  
20  
21 bronchodilators, and is administered relatively late in the course of an ED visit.<sup>15</sup> Given that  
22  
23 most children with asthma will improve with pre-hospital treatment, and/or will not have  
24  
25 sufficient time to “fail to improve” with standard therapy, it appears that any comparative  
26  
27 clinical trials to determine the superiority of one parenteral bronchodilator over another  
28  
29 should be reserved for the in-hospital rather than pre-hospital setting.  
30  
31  
32  
33  
34  
35  
36  
37

### 38 **Limitations**

39  
40 Inclusion in the study was based on a combination of paramedic diagnosis of asthma and  
41  
42 administration of inhaled bronchodilators. While only 89% had a diagnosis of asthma  
43  
44 recorded in the ambulance notes, it seems that the cohort is reflective of the asthma  
45  
46 population as over 87% of cases had a previous diagnosis of asthma.  
47  
48

49  
50 Due to state-wide data collection and large numbers of patients, our study is likely to be  
51  
52 generalisable to other settings with similar pre-hospital care systems. However, most  
53  
54 ambulance cases within Victoria are concentrated in the metropolitan area of Melbourne (the  
55  
56 capital city), which may limit generalisability to rural and regional settings. Approximately 10%  
57  
58  
59  
60



1  
2  
3 of children were not transported to hospital; this is similar to the rate identified in a study of  
4  
5 children with seizures from the same ambulance service.<sup>26</sup>  
6  
7

8 This study is a retrospective review of a comprehensive electronic database. We optimised  
9  
10 data extraction and minimised bias through the collection of variables using a piloted data  
11  
12 collection instrument, and application of pre-defined inclusion and exclusion criteria.<sup>27,28</sup> Due  
13  
14 to the nature of record-keeping within the ambulance service (all cases are documented using  
15  
16 the electronic system), it is unlikely that any cases of escalated care were missed. As we  
17  
18 downloaded fields directly from the electronic medical record system, we did not  
19  
20 independently abstract any variables. However, we verified all instances of documented  
21  
22 escalation of care through consultation with a second (paramedic) reviewer and identified  
23  
24 four cases of misclassification. It is possible that we missed some children who were not  
25  
26 classified as asthma, were critically ill, not given inhaled bronchodilators and only given  
27  
28 parenteral adrenaline. However, this is likely to be a very small number of cases.  
29  
30  
31  
32  
33  
34  
35  
36

### 37 **Conclusions**

38  
39 Most children with acute exacerbations of asthma did not receive escalated therapy during  
40  
41 their pre-hospital treatment from ambulance paramedics. Most patients were treated with  
42  
43 inhaled bronchodilators only and clinically improved by the time they arrived in hospital. Due  
44  
45 to the very low incidence of treatment escalation or clinical deterioration, any comparative  
46  
47 clinical trials to determine the superiority of one parenteral bronchodilator over another  
48  
49 should be reserved for the in-hospital rather than pre-hospital setting.  
50  
51  
52  
53  
54  
55  
56  
57  
58  
59  
60

1  
2  
3  
4  
5  
6 Figure 1. Flow chart – pre-hospital management of acute asthma in children.  
7  
8  
9  
10  
11  
12  
13  
14  
15  
16  
17  
18  
19  
20  
21  
22  
23  
24  
25  
26  
27  
28  
29  
30  
31  
32  
33  
34  
35  
36  
37  
38  
39  
40  
41  
42  
43  
44  
45  
46  
47  
48  
49  
50  
51  
52  
53  
54  
55  
56  
57  
58  
59  
60

AV, Ambulance Victoria.

1  
2  
3  
4  
5  
6 **Box 1.** Asthma severity assessment according to Ambulance Victoria Clinical Practice  
7 Guidelines  
8  
9

10 Mild / Moderate: normal conscious state, some increased work of breathing, tachycardia,  
11 speaking in phrases / sentences  
12

13 Severe: agitated / distressed, markedly increased work of breathing, including accessory  
14 muscle use / retraction, tachycardia, speaking in words.

15 Critical: altered conscious state, maximal work of breathing, marked tachycardia, unable to  
16 talk.  
17  
18  
19  
20  
21  
22  
23  
24  
25  
26  
27  
28  
29  
30  
31  
32  
33  
34  
35  
36  
37  
38  
39  
40  
41  
42  
43  
44  
45  
46  
47  
48  
49  
50  
51  
52  
53  
54  
55  
56  
57  
58  
59  
60

**Table 1.** Demographics and clinical characteristics of children treated or assessed for asthma by AV.

|                                                    | Total<br>(n=1572)  | Escalation<br>of care<br>(n=22) | No<br>escalation<br>of care<br>(n=1550) | P value<br>(escalation<br>vs no<br>escalation) |
|----------------------------------------------------|--------------------|---------------------------------|-----------------------------------------|------------------------------------------------|
| Age, years, n (%)                                  |                    |                                 |                                         |                                                |
| 1-4                                                | 561 (36.3)         | 6 (27.3)                        | 555 (35.8)                              | 0.38                                           |
| 5-11                                               | 690 (43.9)         | 9 (40.9)                        | 681 (43.9)                              |                                                |
| 12-17                                              | 321 (20.4)         | 7 (31.8)                        | 314 (20.3)                              |                                                |
| Median age, years (IQR)                            | 6 (4-10)           | 10.5 (3.8 –<br>14.3)            | 6 (3.8 –<br>10)                         | 0.045                                          |
| Female sex, n (%)                                  | 684 (43.5)         | 11 (50)                         | 877 (43.4)                              | 0.54                                           |
| Pre-existing conditions, n (%)                     |                    |                                 |                                         |                                                |
| Asthma                                             | 1377 (87.6)        | 20 (90.9)                       | 1357<br>(87.5)                          | 0.64                                           |
| Requiring hospital admission                       | 115 (7.3)          | 5 (22.7)                        | 110 (7.1)                               | 0.005                                          |
| Requiring intensive care                           | 63 (4)             | 1 (4.5)                         | 62 (4)                                  | 0.89                                           |
| Requiring intubation                               | 19 (1.2)           | 1 (4.5)                         | 18 (1.2)                                | 0.15                                           |
| With cardiac / respiratory arrest                  | 5 (0.3)            | 0 (0)                           | 5 (0.3)                                 | 0.79                                           |
| Other respiratory illness                          |                    |                                 |                                         |                                                |
| Croup                                              | 94 (6)             | 1 (4.5)                         | 93 (6)                                  | 0.78                                           |
| Bronchiolitis                                      | 80 (5.1)           | 1 (4.5)                         | 79 (5.1)                                | 0.91                                           |
| Pneumonia                                          | 44 (2.8)           | 1 (4.5)                         | 43 (2.8)                                | 0.62                                           |
| Chest infection                                    | 32 (2)             | 1 (4.5)                         | 31 (2)                                  | 0.40                                           |
| Other                                              | 8 (0.5)            | 0 (0)                           | 8 (0.5)                                 | 0.64                                           |
| Initial physiological parameters                   |                    |                                 |                                         |                                                |
| Respiratory rate (breaths/minute),<br>median (IQR) | 32 (24 – 40)       | 35.5 (28 –<br>48.5)             | 32 (24 –<br>40)                         | 0.09                                           |
| Pulse rate (beats/minute), median<br>(IQR)         | 130 (112 –<br>146) | 134.5 (120<br>– 150.5)          | 130 (112<br>– 146)                      | 0.24                                           |
| Initial respiratory status, n (%)                  |                    |                                 |                                         |                                                |
| Normal                                             | 615 (39.1)         | 3 (13.6)                        | 612 (39.5)                              | <0.001                                         |
| Mild respiratory distress                          | 363 (23.1)         | 1 (4.5)                         | 362 (23.4)                              |                                                |
| Moderate respiratory distress                      | 315 (20)           | 2 (9.1)                         | 313 (20.2)                              |                                                |
| Severe respiratory distress                        | 166 (10.6)         | 16 (72.7)                       | 150 (9.7)                               |                                                |
| Depressed respirations                             | 1 (0.1)            | 0 (0)                           | 1 (0.1)                                 |                                                |

1  
2  
3 All P values calculated using Chi-Square tests, except for continuous variables where Mann-  
4 Whitney U tests\* were used.  
5  
6  
7  
8  
9  
10  
11  
12  
13  
14  
15  
16  
17  
18  
19  
20  
21  
22  
23  
24  
25  
26  
27  
28  
29  
30  
31  
32  
33  
34  
35  
36  
37  
38  
39  
40  
41  
42  
43  
44  
45  
46  
47  
48  
49  
50  
51  
52  
53  
54  
55  
56  
57  
58  
59  
60

For peer review only

**Table 2.** Treatment provided by AV paramedics.

|                                                                                           | Total<br>(n=1572) | Escalation of<br>care<br>(n=22) | No escalation<br>of care<br>(n=1550) | P value<br>(escalation<br>vs no<br>escalation) |
|-------------------------------------------------------------------------------------------|-------------------|---------------------------------|--------------------------------------|------------------------------------------------|
| Respiratory support, n(%)                                                                 |                   |                                 |                                      |                                                |
| Bag-valve-mask applied                                                                    | 1 (0.1)           | 1 (4.5)                         | 0 (0)                                | <0.001                                         |
| Oxygen delivery                                                                           |                   |                                 |                                      |                                                |
| Nasal cannulae                                                                            | 46 (2.9)          | 4 (18.2)                        | 42 (2.7)                             | <0.001                                         |
| Nebuliser mask                                                                            | 258 (16.4)        | 10 (45.5)                       | 248 (16)                             | <0.001                                         |
| Oxygen mask                                                                               | 48 (3.1)          | 0 (0)                           | 48 (3.1)                             | 0.40                                           |
| Non-rebreather mask                                                                       | 8 (0.5)           | 0 (0)                           | 8 (0.5)                              | 0.74                                           |
| Other oxygen therapy<br>(not otherwise specified)                                         | 2 (0.1)           | 0 (0)                           | 2 (0.1)                              | 0.87                                           |
| Parenteral bronchodilator                                                                 |                   |                                 |                                      |                                                |
| Adrenaline IM injection                                                                   | 20 (1.3)          | 20 (90.9)                       | 0 (0)                                | <0.001                                         |
| Adrenaline infusion                                                                       | 4 (0.3)           | 4 (18.2)                        | 0 (0)                                | <0.001                                         |
| Dexamethasone                                                                             |                   |                                 |                                      |                                                |
| IV injection                                                                              | 25 (1.6)          | 4 (18.2)                        | 21 (1.4)                             | <0.001                                         |
| Oral                                                                                      | 141 (9)           | 11 (50)                         | 130 (8.4)                            | <0.001                                         |
| Inhaled bronchodilator                                                                    |                   |                                 |                                      |                                                |
| Any inhaled bronchodilator                                                                | 946 (60.2)        | 21 (95.5)                       | 925 (59.7)                           | <0.001                                         |
| Any Ipratropium bromide<br>nebulisation                                                   | 453 (28.8)        | 17 (77.3)                       | 436 (28.1)                           | <0.001                                         |
| Any Salbutamol pMDI                                                                       | 465 (29.6)        | 3 (13.6)                        | 462 (29.8)                           | 0.10                                           |
| Any Salbutamol<br>nebulisation                                                            | 514 (32.6)        | 20 (90.9)                       | 493 (31.8)                           | <0.001                                         |
| Single dose of inhaled<br>salbutamol                                                      | 348 (22.1)        | 3 (13.6)                        | 345 (22.3)                           |                                                |
| Single dose of inhaled<br>ipratropium bromide                                             | 13 (0.8)          | 1 (4.5)                         | 12 (0.8)                             |                                                |
| Single dose of inhaled<br>salbutamol and single dose of<br>inhaled ipratropium<br>bromide | 280 (17.8)        | 6 (27.3)                        | 274 (17.7)                           |                                                |
| Two doses of inhaled<br>salbutamol alone                                                  | 114 (7.3)         | 1 (4.5)                         | 113 (7.3)                            |                                                |

|                                                                                        |           |             |           |        |
|----------------------------------------------------------------------------------------|-----------|-------------|-----------|--------|
| Two doses of inhaled salbutamol and at least one dose of ipratropium bromide           | 112 (7.1) | 3 (13.6)    | 109 (7)   |        |
| Three or more doses of inhaled salbutamol alone                                        | 31 (2.0)  | 0 (0)       | 31 (2)    |        |
| Three or more doses of inhaled salbutamol and at least one dose of ipratropium bromide | 49 (3.1)  | 7 (31.8)    | 41 (2.6)  |        |
| Total instances of inhaled bronchodilator administration, median (IQR)                 | 1 (0-2)   | 2 (1.8 – 4) | 1 (0 – 2) | <0.001 |
| Intravenous access                                                                     |           |             |           |        |
| Intravenous access attempt                                                             | 39 (2.5)  | 7 (31.8)    | 32 (2.1)  | <0.001 |
| Successful IV attempt                                                                  | 34 (2.2)  | 7 (31.8)    | 27 (1.7)  | <0.001 |

No patients received any of: BIPAP, manual ventilation, mechanical ventilation, IV salbutamol infusion, IM dexamethasone.

1  
2  
3 **Figure 2.** Initial and final respiratory status documented by AV paramedics.  
4  
5  
6  
7  
8  
9  
10  
11  
12  
13  
14  
15  
16  
17  
18  
19  
20  
21  
22  
23  
24  
25  
26  
27  
28  
29  
30  
31  
32  
33  
34  
35  
36  
37  
38  
39  
40  
41  
42  
43  
44  
45  
46  
47  
48  
49  
50  
51  
52  
53  
54  
55  
56  
57  
58  
59  
60

Note: 111 patients missing initial respiratory status, and 265 missing final respiratory status.



## References

1. Alpern ER, Stanley RM, Gorelick MH, et al. Epidemiology of a pediatric emergency medicine research network: the PECARN Core Data Project. *Pediatric emergency care* 2006; **22**(10): 689-99.
2. Acworth J, Babl F, Borland M, et al. Patterns of presentation to the Australian and New Zealand Paediatric Emergency Research Network. *Emerg Med Australas* 2009; **21**(1): 59-66.
3. Weiss AJ, Wier LM, Stocks C, Blanchard J. Overview of Emergency Department Visits in the United States, 2011: Statistical Brief #174. Healthcare Cost and Utilization Project (HCUP) Statistical Briefs. Rockville (MD): Agency for Healthcare Research and Quality (US); 2006.
4. Nath JB, Hsia RY. Children's emergency department use for asthma, 2001-2010. *Academic pediatrics* 2015; **15**(2): 225-30.
5. Kantor DB, Phipatanakul W. Intravenous beta agonists and severe pediatric asthma exacerbation: time for a closer look at terbutaline? *Ann Allergy Asthma Immunol* 2014; **112**(3): 187.
6. Giordano K, Rodriguez E, Green N, et al. Pulmonary Function Tests in Emergency Department Pediatric Patients with Acute Wheezing/Asthma Exacerbation. *Pulmonary Medicine* 2012; **2012**: 724139.
7. Kelly AM, Kerr D, Powell C. Is severity assessment after one hour of treatment better for predicting the need for admission in acute asthma? *Respir Med* 2004; **98**(8): 777-81.
8. Powell CV, Kelly AM, Kerr D. Lack of agreement in classification of the severity of acute asthma between emergency physician assessment and classification using the National Asthma Council Australia guidelines (1998). *Emergency medicine (Fremantle, WA)* 2003; **15**(1): 49-53.
9. O'Connor MG, Saville BR, Hartert TV, Arnold DH. Treatment Variability of Asthma Exacerbations in a Pediatric Emergency Department Using a Severity-Based Management Protocol. *Clinical pediatrics* 2014; **53**(13): 1288-90.
10. Biagini Myers JM, Simmons JM, Kercksmar CM, et al. Heterogeneity in asthma care in a statewide collaborative: the Ohio Pediatric Asthma Repository. *Pediatrics* 2015; **135**(2): 271-9.
11. Morris I, Lyttle MD, O'Sullivan R, Sargant N, Doull IJ, Powell CV. Which intravenous bronchodilators are being administered to children presenting with acute severe wheeze in the UK and Ireland? *Thorax* 2015; **70**(1): 88-91.
12. Craig S, Powell CVE, Nixon GM, et al. Treatment patterns and frequency of key outcomes in acute severe asthma in children: a Paediatric Research in Emergency Departments International Collaborative (PREDICT) multicentre cohort study. *BMJ Open Respir Res* 2022; **9**(1).
13. Monteverde-Fernandez N, Diaz-Rubio F, Vásquez-Hoyos P, Rotta AT, González-Dambruskas S. Variability in care for children with severe acute asthma in Latin America. *Pediatr Pulmonol* 2021; **56**(2): 384-91.
14. Kalburgi S, Halley T. High-Flow Nasal Cannula Use Outside of the ICU Setting. *Pediatrics* 2020; **146**(5).
15. Johnson MD, Zorc JJ, Nelson DS, et al. Intravenous Magnesium in Asthma Pharmacotherapy: Variability in Use in the PECARN Registry. *J Pediatr* 2020; **220**: 165-74.e2.

16. Craig SS, Dalziel SR, Powell CV, Graudins A, Babl FE, Lunny C. Interventions for escalation of therapy for acute exacerbations of asthma in children: an overview of Cochrane Reviews. *Cochrane Database Syst Rev* 2020; **8**: Cd012977.
17. Gray CS, Powell CVE, Babl FE, Dalziel SR, Craig S. Variability of outcome measures in trials of intravenous therapy in acute severe paediatric asthma: a systematic review. *Emerg Med J* 2019; **36**(4): 225-30.
18. Nassif A, Ostermayer DG, Hoang KB, Claiborne MK, Camp EA, Shah MI. Implementation of a Prehospital Protocol Change For Asthmatic Children. *Prehosp Emerg Care* 2018; **22**(4): 457-65.
19. Riney LC, Schwartz H, Murtagh Kurowski E, Collett L, Florin TA. Improving Administration of Prehospital Corticosteroids for Pediatric Asthma. *Pediatr Qual Saf* 2021; **6**(3): e410.
20. Cheetham AL, Navanandan N, Leonard J, Spaur K, Markowitz G, Adalgais KM. Impact of prehospital pediatric asthma management protocol adherence on clinical outcomes. *J Asthma* 2022; **59**(5): 937-45.
21. von Elm E, Altman DG, Egger M, Pocock SJ, Gøtzsche PC, Vandenbroucke JP. The Strengthening the Reporting of Observational Studies in Epidemiology (STROBE) statement: guidelines for reporting observational studies. *Ann Intern Med* 2007; **147**(8): 573-7.
22. Ambulance Victoria. Clinical Practice Guidelines for Ambulance and MICA Paramedics. January 2018. Ambulance Victoria, Doncaster.  
[Online resource: Available from: <https://www.ambulance.vic.gov.au/wp-content/uploads/2019/07/Clinical-Practice-Guidelines-2018-Edition-1.9-1.pdf> Accessed 15/9/2022].
23. Ambulance Victoria Annual report 2019-20. Ambulance Victoria, Melbourne. 2020.  
[Online resource. Available from: <https://www.ambulance.vic.gov.au/about-us/our-performance/> Accessed 15/9/2022].
24. Craig S, Powell CVE, Nixon GM, et al. Treatment patterns and frequency of key outcomes in acute severe asthma in children: a Paediatric Research in Emergency Departments International Collaborative (PREDICT) multicentre cohort study. *BMJ Open Respir Res.* 2022 Mar;9(1):e001137. .
25. Hasegawa K, Craig SS, Teach SJ, Camargo CA Jr. Management of Asthma Exacerbations in the Emergency Department. *J Allergy Clin Immunol Pract.* 2020 Dec 31:S2213-2198(20)31399-4. .
26. Pfeiffer CK, Smith K, Bernard S, et al. Prehospital benzodiazepine use and need for respiratory support in paediatric seizures. *Emerg Med J* 2022; **39**(8): 608-15.
27. Gilbert EH, Lowenstein SR, Koziol-McLain J, Barta DC, Steiner J. Chart reviews in emergency medicine research: Where are the methods? *Ann Emerg Med* 1996; **27**(3): 305-8.
28. Kaji AH, Schriger D, Green S. Looking through the retrospectroscope: reducing bias in emergency medicine chart review studies. *Ann Emerg Med* 2014; **64**(3): 292-8.

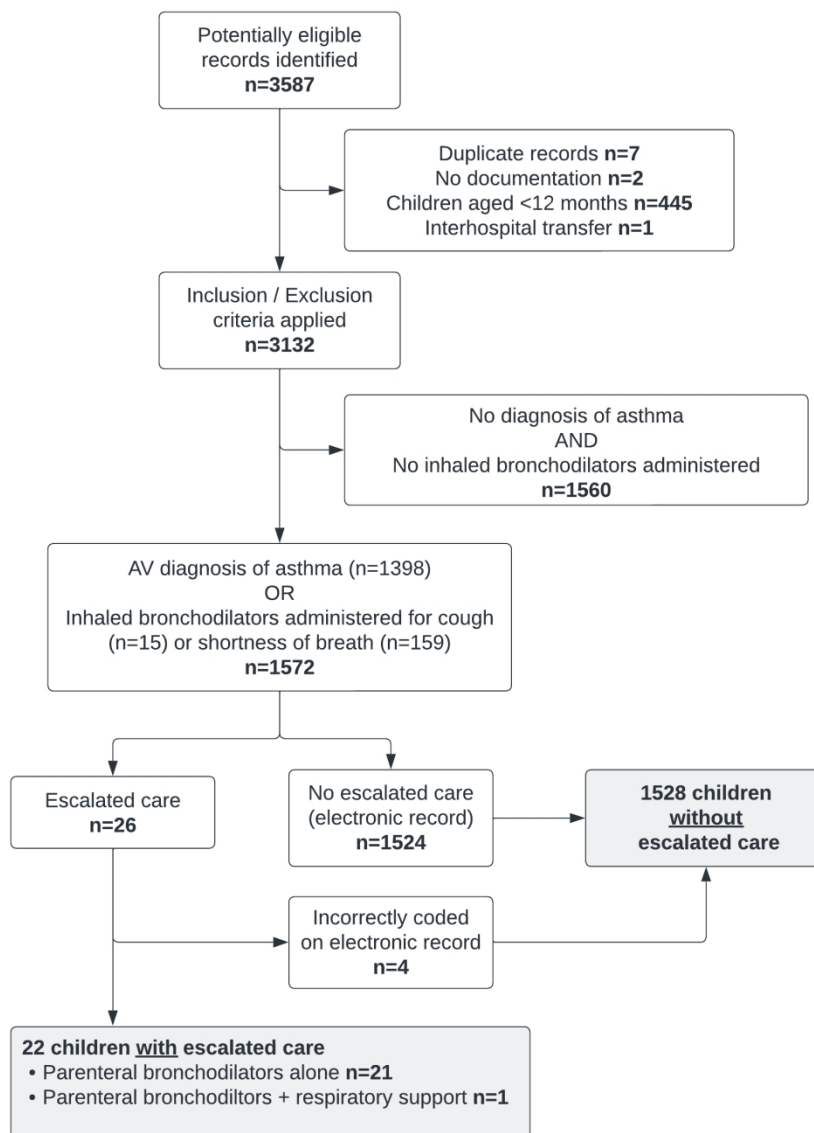

152x205mm (300 x 300 DPI)

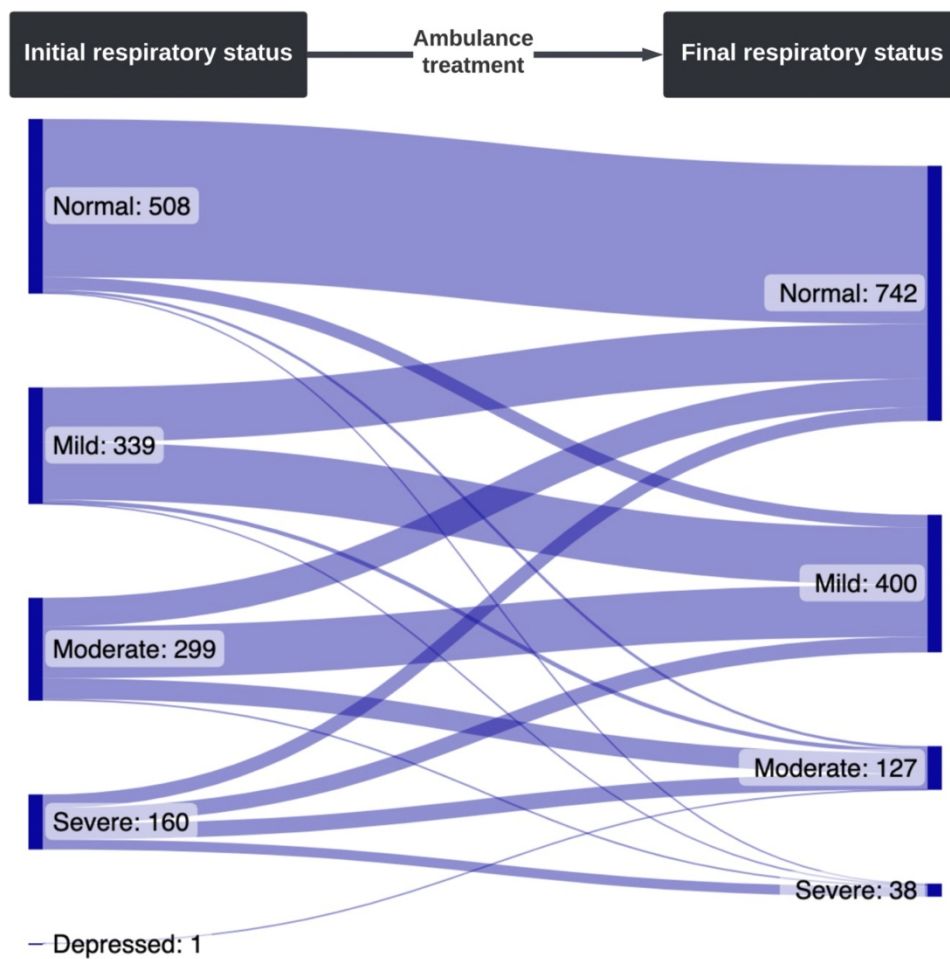

1328x1387mm (72 x 72 DPI)

## STROBE Statement—checklist of items that should be included in reports of observational studies

|                              | Item No | Recommendation                                                                                                                                                                                                                                                                                                                                                                                                                                                                                                                                                                                                                                                                                                                                          |
|------------------------------|---------|---------------------------------------------------------------------------------------------------------------------------------------------------------------------------------------------------------------------------------------------------------------------------------------------------------------------------------------------------------------------------------------------------------------------------------------------------------------------------------------------------------------------------------------------------------------------------------------------------------------------------------------------------------------------------------------------------------------------------------------------------------|
| <b>Title and abstract</b>    | 1       | (a) Indicate the study's design with a commonly used term in the title or the abstract<br><b>YES – see title.</b>                                                                                                                                                                                                                                                                                                                                                                                                                                                                                                                                                                                                                                       |
|                              |         | (b) Provide in the abstract an informative and balanced summary of what was done and what was found<br><b>Structured abstract provided</b>                                                                                                                                                                                                                                                                                                                                                                                                                                                                                                                                                                                                              |
| <b>Introduction</b>          |         |                                                                                                                                                                                                                                                                                                                                                                                                                                                                                                                                                                                                                                                                                                                                                         |
| Background/rationale         | 2       | Explain the scientific background and rationale for the investigation being reported<br><b>Page 7</b>                                                                                                                                                                                                                                                                                                                                                                                                                                                                                                                                                                                                                                                   |
| Objectives                   | 3       | State specific objectives, including any prespecified hypotheses<br><b>Page 8</b>                                                                                                                                                                                                                                                                                                                                                                                                                                                                                                                                                                                                                                                                       |
| <b>Methods</b>               |         |                                                                                                                                                                                                                                                                                                                                                                                                                                                                                                                                                                                                                                                                                                                                                         |
| Study design                 | 4       | Present key elements of study design early in the paper<br><b>Page 8 – (“study design” section)</b>                                                                                                                                                                                                                                                                                                                                                                                                                                                                                                                                                                                                                                                     |
| Setting                      | 5       | Describe the setting, locations, and relevant dates, including periods of recruitment, exposure, follow-up, and data collection<br><b>Page 8-9 (“study setting” section)</b>                                                                                                                                                                                                                                                                                                                                                                                                                                                                                                                                                                            |
| Participants                 | 6       | (a) <i>Cohort study</i> —Give the eligibility criteria, and the sources and methods of selection of participants. Describe methods of follow-up<br><i>Case-control study</i> —Give the eligibility criteria, and the sources and methods of case ascertainment and control selection. Give the rationale for the choice of cases and controls<br><i>Cross-sectional study</i> —Give the eligibility criteria, and the sources and methods of selection of participants<br>(b) <i>Cohort study</i> —For matched studies, give matching criteria and number of exposed and unexposed<br><i>Case-control study</i> —For matched studies, give matching criteria and the number of controls per case<br><b>Page 9 (“selection of participants” section)</b> |
| Variables                    | 7       | Clearly define all outcomes, exposures, predictors, potential confounders, and effect modifiers. Give diagnostic criteria, if applicable<br><b>Page 9-10 (“data collection” section)</b>                                                                                                                                                                                                                                                                                                                                                                                                                                                                                                                                                                |
| Data sources/<br>measurement | 8*      | For each variable of interest, give sources of data and details of methods of assessment (measurement). Describe comparability of assessment methods if there is more than one group<br><b>Page 9-10 (“data collection” section)</b>                                                                                                                                                                                                                                                                                                                                                                                                                                                                                                                    |
| Bias                         | 9       | Describe any efforts to address potential sources of bias<br><b>Page 10 (end of “data collection” section)</b>                                                                                                                                                                                                                                                                                                                                                                                                                                                                                                                                                                                                                                          |
| Study size                   | 10      | Explain how the study size was arrived at<br><b>Page 10 (“analysis” section)</b>                                                                                                                                                                                                                                                                                                                                                                                                                                                                                                                                                                                                                                                                        |
| Quantitative variables       | 11      | Explain how quantitative variables were handled in the analyses. If applicable, describe which groupings were chosen and why<br><b>Page 10 (“analysis” section)</b>                                                                                                                                                                                                                                                                                                                                                                                                                                                                                                                                                                                     |

|                     |     |                                                                                                                                                                                                                                                                                                                                                                                                                                                                                                                                                                                                                             |
|---------------------|-----|-----------------------------------------------------------------------------------------------------------------------------------------------------------------------------------------------------------------------------------------------------------------------------------------------------------------------------------------------------------------------------------------------------------------------------------------------------------------------------------------------------------------------------------------------------------------------------------------------------------------------------|
| Statistical methods | 12  | <p>(a) Describe all statistical methods, including those used to control for confounding</p> <p>(b) Describe any methods used to examine subgroups and interactions</p> <p>(c) Explain how missing data were addressed</p> <p>(d) <i>Cohort study</i>—If applicable, explain how loss to follow-up was addressed<br/><i>Case-control study</i>—If applicable, explain how matching of cases and controls was addressed<br/><i>Cross-sectional study</i>—If applicable, describe analytical methods taking account of sampling strategy</p> <p>(e) Describe any sensitivity analyses</p> <p>Page 10 (“analysis” section)</p> |
| <b>Results</b>      |     |                                                                                                                                                                                                                                                                                                                                                                                                                                                                                                                                                                                                                             |
| Participants        | 13* | <p>(a) Report numbers of individuals at each stage of study—eg numbers potentially eligible, examined for eligibility, confirmed eligible, included in the study, completing follow-up, and analysed Page 10-11 (“results” section)</p> <p>(b) Give reasons for non-participation at each stage Page 10-11 (“results” section)</p> <p>(c) Consider use of a flow diagram – See figure 1</p>                                                                                                                                                                                                                                 |
| Descriptive data    | 14* | <p>(a) Give characteristics of study participants (eg demographic, clinical, social) and information on exposures and potential confounders<br/>Page 10-11 (“results” section) and table 1</p> <p>(b) Indicate number of participants with missing data for each variable of interest<br/>Not applicable (no missing data)</p> <p>(c) <i>Cohort study</i>—Summarise follow-up time (eg, average and total amount)<br/>Not applicable (no patient follow-up)</p>                                                                                                                                                             |
| Outcome data        | 15* | <p><i>Cohort study</i>—Report numbers of outcome events or summary measures over time</p> <p><i>Case-control study</i>—Report numbers in each exposure category, or summary measures of exposure</p> <p><i>Cross-sectional study</i>—Report numbers of outcome events or summary measures<br/>Table 2, Figure 2 and results (page 10-12)</p>                                                                                                                                                                                                                                                                                |
| Main results        | 16  | <p>(a) Give unadjusted estimates and, if applicable, confounder-adjusted estimates and their precision (eg, 95% confidence interval). Make clear which confounders were adjusted for and why they were included</p> <p>(b) Report category boundaries when continuous variables were categorized</p> <p>(c) If relevant, consider translating estimates of relative risk into absolute risk for a meaningful time period<br/>Table 2, Figure 2 and results (page 10-12)</p>                                                                                                                                                 |
| Other analyses      | 17  | <p>Report other analyses done—eg analyses of subgroups and interactions, and sensitivity analyses</p> <p>Not applicable. No subgroup analyses performed</p>                                                                                                                                                                                                                                                                                                                                                                                                                                                                 |
| <b>Discussion</b>   |     |                                                                                                                                                                                                                                                                                                                                                                                                                                                                                                                                                                                                                             |
| Key results         | 18  | <p>Summarise key results with reference to study objectives<br/>Page 13-14</p>                                                                                                                                                                                                                                                                                                                                                                                                                                                                                                                                              |
| Limitations         | 19  | <p>Discuss limitations of the study, taking into account sources of potential bias or imprecision. Discuss both direction and magnitude of any potential bias<br/>Page 14-15</p>                                                                                                                                                                                                                                                                                                                                                                                                                                            |

1  
2  
3  
4  
5  
6  
7  
8  
9  
10  
11  
12  
13  
14  
15  
16  
17  
18  
19  
20  
21  
22  
23  
24  
25  
26  
27  
28  
29  
30  
31  
32  
33  
34  
35  
36  
37  
38  
39  
40  
41  
42  
43  
44  
45  
46  
47  
48  
49  
50  
51  
52  
53  
54  
55  
56  
57  
58  
59  
60

|                |    |                                                                                                                                                                            |
|----------------|----|----------------------------------------------------------------------------------------------------------------------------------------------------------------------------|
| Interpretation | 20 | Give a cautious overall interpretation of results considering objectives, limitations, multiplicity of analyses, results from similar studies, and other relevant evidence |
|----------------|----|----------------------------------------------------------------------------------------------------------------------------------------------------------------------------|

Page 13-15

|                  |    |                                                                       |
|------------------|----|-----------------------------------------------------------------------|
| Generalisability | 21 | Discuss the generalisability (external validity) of the study results |
|------------------|----|-----------------------------------------------------------------------|

Page 13-15

### Other information

|         |    |                                                                                                                                                               |
|---------|----|---------------------------------------------------------------------------------------------------------------------------------------------------------------|
| Funding | 22 | Give the source of funding and the role of the funders for the present study and, if applicable, for the original study on which the present article is based |
|---------|----|---------------------------------------------------------------------------------------------------------------------------------------------------------------|

Funding disclosures provided

\*Give information separately for cases and controls in case-control studies and, if applicable, for exposed and unexposed groups in cohort and cross-sectional studies.

**Note:** An Explanation and Elaboration article discusses each checklist item and gives methodological background and published examples of transparent reporting. The STROBE checklist is best used in conjunction with this article (freely available on the Web sites of PLoS Medicine at <http://www.plosmedicine.org/>, Annals of Internal Medicine at <http://www.annals.org/>, and Epidemiology at <http://www.epidem.com/>). Information on the STROBE Initiative is available at [www.strobe-statement.org](http://www.strobe-statement.org).

# BMJ Open

## Acute paediatric asthma treatment in the pre-hospital setting: a retrospective observational study.

|                                 |                                                                                                                                                                                                                                                                                                                                                                                                                                                                                                                                                                                                                                                                                                                                                                                                                                                                                                                                                                                                                                                                                                                                 |
|---------------------------------|---------------------------------------------------------------------------------------------------------------------------------------------------------------------------------------------------------------------------------------------------------------------------------------------------------------------------------------------------------------------------------------------------------------------------------------------------------------------------------------------------------------------------------------------------------------------------------------------------------------------------------------------------------------------------------------------------------------------------------------------------------------------------------------------------------------------------------------------------------------------------------------------------------------------------------------------------------------------------------------------------------------------------------------------------------------------------------------------------------------------------------|
| Journal:                        | <i>BMJ Open</i>                                                                                                                                                                                                                                                                                                                                                                                                                                                                                                                                                                                                                                                                                                                                                                                                                                                                                                                                                                                                                                                                                                                 |
| Manuscript ID                   | bmjopen-2023-073029.R1                                                                                                                                                                                                                                                                                                                                                                                                                                                                                                                                                                                                                                                                                                                                                                                                                                                                                                                                                                                                                                                                                                          |
| Article Type:                   | Original research                                                                                                                                                                                                                                                                                                                                                                                                                                                                                                                                                                                                                                                                                                                                                                                                                                                                                                                                                                                                                                                                                                               |
| Date Submitted by the Author:   | 25-Apr-2023                                                                                                                                                                                                                                                                                                                                                                                                                                                                                                                                                                                                                                                                                                                                                                                                                                                                                                                                                                                                                                                                                                                     |
| Complete List of Authors:       | Craig, Simon; Monash Medical Centre Clayton, Paediatric Emergency Department; Monash University Department of Paediatrics<br>Delardes, Belinda; Ambulance Victoria; Monash University Department of Paramedicine<br>Nehme, Ziad; Ambulance Victoria, Research & Evaluation; Monash University School of Public Health and Preventive Medicine<br>Wilson, Catherine; Murdoch Childrens Research Institute, Emergency Medicine Research Group; PREDICT, Research Group<br>Dalziel, Stuart; Starship Children's Health, Emergency Department; The University of Auckland Faculty of Medical and Health Sciences, Paediatrics and Surgery<br>Nixon, Gillian; Monash University Department of Paediatrics; Monash Children's Hospital, Respiratory Medicine<br>Powell, Colin; Sidra Medical and Research Center, Department of Emergency Medicine; Cardiff School of Health Sciences<br>Graudins, Andis; Monash Health, Dandenong Emergency Department; Monash University<br>Babl, Franz; Royal Childrens Hospital, Emergency Department; The University of Melbourne Faculty of Medicine Dentistry and Health Sciences, Paediatrics |
| <b>Primary Subject Heading</b>: | Paediatrics                                                                                                                                                                                                                                                                                                                                                                                                                                                                                                                                                                                                                                                                                                                                                                                                                                                                                                                                                                                                                                                                                                                     |
| Secondary Subject Heading:      | Emergency medicine                                                                                                                                                                                                                                                                                                                                                                                                                                                                                                                                                                                                                                                                                                                                                                                                                                                                                                                                                                                                                                                                                                              |
| Keywords:                       | Asthma < THORACIC MEDICINE, ACCIDENT & EMERGENCY MEDICINE, Paediatric A&E and ambulatory care < PAEDIATRICS                                                                                                                                                                                                                                                                                                                                                                                                                                                                                                                                                                                                                                                                                                                                                                                                                                                                                                                                                                                                                     |
|                                 |                                                                                                                                                                                                                                                                                                                                                                                                                                                                                                                                                                                                                                                                                                                                                                                                                                                                                                                                                                                                                                                                                                                                 |

SCHOLARONE™  
Manuscripts





I, the Submitting Author has the right to grant and does grant on behalf of all authors of the Work (as defined in the below author licence), an exclusive licence and/or a non-exclusive licence for contributions from authors who are: i) UK Crown employees; ii) where BMJ has agreed a CC-BY licence shall apply, and/or iii) in accordance with the terms applicable for US Federal Government officers or employees acting as part of their official duties; on a worldwide, perpetual, irrevocable, royalty-free basis to BMJ Publishing Group Ltd ("BMJ") its licensees and where the relevant Journal is co-owned by BMJ to the co-owners of the Journal, to publish the Work in this journal and any other BMJ products and to exploit all rights, as set out in our [licence](#).

The Submitting Author accepts and understands that any supply made under these terms is made by BMJ to the Submitting Author unless you are acting as an employee on behalf of your employer or a postgraduate student of an affiliated institution which is paying any applicable article publishing charge ("APC") for Open Access articles. Where the Submitting Author wishes to make the Work available on an Open Access basis (and intends to pay the relevant APC), the terms of reuse of such Open Access shall be governed by a Creative Commons licence – details of these licences and which [Creative Commons](#) licence will apply to this Work are set out in our licence referred to above.

Other than as permitted in any relevant BMJ Author's Self Archiving Policies, I confirm this Work has not been accepted for publication elsewhere, is not being considered for publication elsewhere and does not duplicate material already published. I confirm all authors consent to publication of this Work and authorise the granting of this licence.

1  
2  
3 **Acute paediatric asthma treatment in the pre-hospital setting: a retrospective**  
4 **observational study.**  
5  
6  
7  
8  
9

10 **Simon Craig**<sup>1,2,3</sup> MBBS FACEM MPH MHPE, **Belinda Delardes**<sup>4,5</sup> B Paramedic (Hons), **Ziad**  
11 **Nehme**<sup>4,5,6</sup> PhD, **Catherine L Wilson**<sup>3</sup> Dip App Sci Nurs MPH Ms Evaluation and Assessment,  
12 **Stuart R Dalziel**<sup>7,8</sup> MBChB FRACP PhD, **Gillian M Nixon**<sup>1,9</sup> MBChB MD FRACP, **Colin VE**  
13 **Powell**<sup>10,11</sup> MBChB DCH MRCP(UK) FRACP FRCPC MD, **Andis Gaudins**<sup>12,13,14</sup> MBBS PhD  
14 FACEM FACMT, **Franz E Babl**<sup>3,15,16,17</sup> MD MPH DMedSc FRACP FAAP FACEP on behalf of the  
15 PREDICT Network.  
16  
17  
18  
19  
20  
21  
22  
23  
24  
25  
26  
27  
28  
29

30 **Affiliations**

- 31  
32 1. Department of Paediatrics, School of Clinical Sciences at Monash Health, Monash  
33 University, Victoria, Australia.  
34  
35 2. Monash Emergency Program, Paediatric Emergency Department, Monash Medical  
36 Centre, Monash Health, Victoria, Australia.  
37  
38 3. Emergency Research, Clinical Sciences, Murdoch Children's Research Institute,  
39 Victoria, Australia  
40  
41 4. Ambulance Victoria, Blackburn North, Victoria, Australia  
42  
43 5. Department of Paramedicine, Monash University, Frankston, Victoria, Australia  
44  
45 6. School of Public Health and Preventive Medicine, Monash University, Melbourne,  
46 Victoria, Australia  
47  
48 7. Departments of Surgery and Paediatrics: Child and Youth Health, The University of  
49 Auckland, New Zealand.  
50  
51  
52  
53  
54  
55  
56  
57  
58  
59  
60

- 1
  - 2
  - 3
  - 4
  - 5
  - 6
  - 7
  - 8
  - 9
  - 10
  - 11
  - 12
  - 13
  - 14
  - 15
  - 16
  - 17
  - 18
  - 19
  - 20
  - 21
  - 22
  - 23
  - 24
  - 25
  - 26
  - 27
  - 28
  - 29
  - 30
  - 31
  - 32
  - 33
  - 34
  - 35
  - 36
  - 37
  - 38
  - 39
  - 40
  - 41
  - 42
  - 43
  - 44
  - 45
  - 46
  - 47
  - 48
  - 49
  - 50
  - 51
  - 52
  - 53
  - 54
  - 55
  - 56
  - 57
  - 58
  - 59
  - 60
8. Children's Emergency Department, Starship Children's Hospital, Auckland, New Zealand
9. Department of Respiratory Medicine, Monash Children's Hospital, Melbourne, Victoria, Australia.
10. Division of Population Medicine, School of Medicine, Cardiff, United Kingdom.
11. Emergency Medicine, Sidra Medicine, Doha Qatar
12. Department of Medicine, School of Clinical Sciences at Monash Health, Monash University, Victoria, Australia.
13. Monash Emergency Program, Monash Health, Dandenong Hospital, Victoria, Australia.
14. Monash Health Clinical Toxicology and Addiction Medicine Service, Monash Health, Dandenong Hospital, Victoria, Australia.
15. Department of Emergency Medicine, The Royal Children's Hospital, Victoria, Australia.
16. Department of Paediatrics, Faculty of Medicine, Dentistry and Health Sciences, University of Melbourne, Victoria, Australia.
17. Department of Critical Care, Faculty of Medicine, Dentistry and Health Sciences, University of Melbourne, Victoria, Australia.

Abstract 238 words (max 300)

Main text 2398 words (max 3000)

27 references (max 30)

2 tables, 2 figures, 1 box (up to 6 total). One supplementary online table.

1  
2  
3  
4  
5  
6  
7  
8  
9  
10 Corresponding author  
11  
12

13 Prof Simon Craig  
14

- 15 - Paediatric Emergency Department, Monash Medical Centre, Monash Health, Clayton,  
16  
17 Victoria, Australia  
18
- 19 - Department of Paediatrics, Monash University, Clayton, Victoria, Australia  
20  
21

22 [Simon.Craig@monash.edu](mailto:Simon.Craig@monash.edu)  
23  
24  
25  
26  
27  
28  
29  
30  
31  
32  
33  
34  
35  
36  
37  
38  
39  
40  
41  
42  
43  
44  
45  
46  
47  
48  
49  
50  
51  
52  
53  
54  
55  
56  
57  
58  
59  
60

1  
2  
3 **Objectives:** To describe the incidence of and patterns of “escalated care” (care in addition to  
4 standard treatment with systemic corticosteroids and inhaled bronchodilators) for children  
5 receiving pre-hospital treatment for asthma.  
6  
7  
8  
9

10  
11  
12  
13 **Design:** Retrospective observational study  
14  
15

16  
17  
18 **Setting:** State-wide ambulance service data (Ambulance Victoria in Victoria, Australia,  
19 population 6.5 million)  
20  
21  
22

23  
24  
25 **Participants:** Children aged 1-17 years and given a final diagnosis of asthma by the treating  
26 paramedics and/or treated with inhaled bronchodilators from 1 July 2019 to 30 June 2020.  
27  
28  
29

30  
31  
32 **Primary and secondary outcome measures:** We classified “escalation of care” as parenteral  
33 administration of adrenaline, or provision of respiratory support. We compared clinical,  
34 demographic and treatments administered between those receiving and not receiving  
35 escalation of care.  
36  
37  
38  
39  
40  
41  
42  
43  
44

45 **Results:** Paramedics attended 1,572 children with acute exacerbations of asthma during the  
46 1-year study period. Of these, 22 (1.4%) had escalated care, all receiving parenteral  
47 adrenaline. Patients with escalated care were more likely to be older, had previously required  
48 hospital admission for asthma and had severe respiratory distress at initial assessment.  
49  
50  
51  
52  
53  
54  
55  
56  
57  
58  
59  
60  
61  
62  
63  
64  
65  
66  
67  
68  
69  
70  
71  
72  
73  
74  
75  
76  
77  
78  
79  
80  
81  
82  
83  
84  
85  
86  
87  
88  
89  
90  
91  
92  
93  
94  
95  
96  
97  
98  
99  
100  
101  
102  
103  
104  
105  
106  
107  
108  
109  
110  
111  
112  
113  
114  
115  
116  
117  
118  
119  
120  
121  
122  
123  
124  
125  
126  
127  
128  
129  
130  
131  
132  
133  
134  
135  
136  
137  
138  
139  
140  
141  
142  
143  
144  
145  
146  
147  
148  
149  
150  
151  
152  
153  
154  
155  
156  
157  
158  
159  
160  
161  
162  
163  
164  
165  
166  
167  
168  
169  
170  
171  
172  
173  
174  
175  
176  
177  
178  
179  
180  
181  
182  
183  
184  
185  
186  
187  
188  
189  
190  
191  
192  
193  
194  
195  
196  
197  
198  
199  
200  
201  
202  
203  
204  
205  
206  
207  
208  
209  
210  
211  
212  
213  
214  
215  
216  
217  
218  
219  
220  
221  
222  
223  
224  
225  
226  
227  
228  
229  
230  
231  
232  
233  
234  
235  
236  
237  
238  
239  
240  
241  
242  
243  
244  
245  
246  
247  
248  
249  
250  
251  
252  
253  
254  
255  
256  
257  
258  
259  
260  
261  
262  
263  
264  
265  
266  
267  
268  
269  
270  
271  
272  
273  
274  
275  
276  
277  
278  
279  
280  
281  
282  
283  
284  
285  
286  
287  
288  
289  
290  
291  
292  
293  
294  
295  
296  
297  
298  
299  
300  
301  
302  
303  
304  
305  
306  
307  
308  
309  
310  
311  
312  
313  
314  
315  
316  
317  
318  
319  
320  
321  
322  
323  
324  
325  
326  
327  
328  
329  
330  
331  
332  
333  
334  
335  
336  
337  
338  
339  
340  
341  
342  
343  
344  
345  
346  
347  
348  
349  
350  
351  
352  
353  
354  
355  
356  
357  
358  
359  
360  
361  
362  
363  
364  
365  
366  
367  
368  
369  
370  
371  
372  
373  
374  
375  
376  
377  
378  
379  
380  
381  
382  
383  
384  
385  
386  
387  
388  
389  
390  
391  
392  
393  
394  
395  
396  
397  
398  
399  
400  
401  
402  
403  
404  
405  
406  
407  
408  
409  
410  
411  
412  
413  
414  
415  
416  
417  
418  
419  
420  
421  
422  
423  
424  
425  
426  
427  
428  
429  
430  
431  
432  
433  
434  
435  
436  
437  
438  
439  
440  
441  
442  
443  
444  
445  
446  
447  
448  
449  
450  
451  
452  
453  
454  
455  
456  
457  
458  
459  
460  
461  
462  
463  
464  
465  
466  
467  
468  
469  
470  
471  
472  
473  
474  
475  
476  
477  
478  
479  
480  
481  
482  
483  
484  
485  
486  
487  
488  
489  
490  
491  
492  
493  
494  
495  
496  
497  
498  
499  
500  
501  
502  
503  
504  
505  
506  
507  
508  
509  
510  
511  
512  
513  
514  
515  
516  
517  
518  
519  
520  
521  
522  
523  
524  
525  
526  
527  
528  
529  
530  
531  
532  
533  
534  
535  
536  
537  
538  
539  
540  
541  
542  
543  
544  
545  
546  
547  
548  
549  
550  
551  
552  
553  
554  
555  
556  
557  
558  
559  
560  
561  
562  
563  
564  
565  
566  
567  
568  
569  
570  
571  
572  
573  
574  
575  
576  
577  
578  
579  
580  
581  
582  
583  
584  
585  
586  
587  
588  
589  
590  
591  
592  
593  
594  
595  
596  
597  
598  
599  
600  
601  
602  
603  
604  
605  
606  
607  
608  
609  
610  
611  
612  
613  
614  
615  
616  
617  
618  
619  
620  
621  
622  
623  
624  
625  
626  
627  
628  
629  
630  
631  
632  
633  
634  
635  
636  
637  
638  
639  
640  
641  
642  
643  
644  
645  
646  
647  
648  
649  
650  
651  
652  
653  
654  
655  
656  
657  
658  
659  
660  
661  
662  
663  
664  
665  
666  
667  
668  
669  
670  
671  
672  
673  
674  
675  
676  
677  
678  
679  
680  
681  
682  
683  
684  
685  
686  
687  
688  
689  
690  
691  
692  
693  
694  
695  
696  
697  
698  
699  
700  
701  
702  
703  
704  
705  
706  
707  
708  
709  
710  
711  
712  
713  
714  
715  
716  
717  
718  
719  
720  
721  
722  
723  
724  
725  
726  
727  
728  
729  
730  
731  
732  
733  
734  
735  
736  
737  
738  
739  
740  
741  
742  
743  
744  
745  
746  
747  
748  
749  
750  
751  
752  
753  
754  
755  
756  
757  
758  
759  
760  
761  
762  
763  
764  
765  
766  
767  
768  
769  
770  
771  
772  
773  
774  
775  
776  
777  
778  
779  
780  
781  
782  
783  
784  
785  
786  
787  
788  
789  
790  
791  
792  
793  
794  
795  
796  
797  
798  
799  
800  
801  
802  
803  
804  
805  
806  
807  
808  
809  
810  
811  
812  
813  
814  
815  
816  
817  
818  
819  
820  
821  
822  
823  
824  
825  
826  
827  
828  
829  
830  
831  
832  
833  
834  
835  
836  
837  
838  
839  
840  
841  
842  
843  
844  
845  
846  
847  
848  
849  
850  
851  
852  
853  
854  
855  
856  
857  
858  
859  
860  
861  
862  
863  
864  
865  
866  
867  
868  
869  
870  
871  
872  
873  
874  
875  
876  
877  
878  
879  
880  
881  
882  
883  
884  
885  
886  
887  
888  
889  
890  
891  
892  
893  
894  
895  
896  
897  
898  
899  
900  
901  
902  
903  
904  
905  
906  
907  
908  
909  
910  
911  
912  
913  
914  
915  
916  
917  
918  
919  
920  
921  
922  
923  
924  
925  
926  
927  
928  
929  
930  
931  
932  
933  
934  
935  
936  
937  
938  
939  
940  
941  
942  
943  
944  
945  
946  
947  
948  
949  
950  
951  
952  
953  
954  
955  
956  
957  
958  
959  
960  
961  
962  
963  
964  
965  
966  
967  
968  
969  
970  
971  
972  
973  
974  
975  
976  
977  
978  
979  
980  
981  
982  
983  
984  
985  
986  
987  
988  
989  
990  
991  
992  
993  
994  
995  
996  
997  
998  
999  
1000

1  
2  
3  
4  
5  
6 **Conclusions:** Most children with acute exacerbations of asthma did not receive escalated  
7  
8 therapy during their pre-hospital treatment from ambulance paramedics. Most patients were  
9  
10 treated with inhaled bronchodilators only and clinically improved by the time they arrived in  
11  
12 hospital.  
13  
14  
15  
16  
17  
18  
19  
20  
21  
22

### 23 **Strengths and limitations of this study**

- 24 - Highly generalisable, with the use of a comprehensive electronic state-wide  
25 ambulance database.  
26
- 27 - Most ambulance cases were concentrated in metropolitan regions; this may limit  
28 generalisability to rural and regional settings.  
29
- 30 - Bias was minimised by direct download from electronic medical record, rather than  
31 abstraction by reviewers.  
32
- 33 - It is possible that a small number of critically ill cases were misclassified due to an  
34 ambulance diagnosis other than asthma.  
35  
36  
37  
38  
39  
40  
41  
42  
43  
44  
45  
46  
47  
48  
49  
50  
51  
52  
53  
54  
55  
56  
57  
58  
59  
60

## **Introduction**

Asthma is a frequent reason for children to attend the emergency department (ED),<sup>1,2</sup> and one of the most common reasons for paediatric hospitalization after an ED visit.<sup>3</sup> In the USA, the rate of paediatric ED visits for asthma increased by 13.3% between 2001 and 2010,<sup>4</sup> while in the United Kingdom, it is estimated that a child is admitted to hospital with an asthma attack every 20 minutes.<sup>5</sup>

Most children with asthma have mild or moderate exacerbations, and respond to first-line treatment with inhaled bronchodilator therapy and systemic steroids.<sup>6-9</sup> However, some children with severe asthma require more intensive therapies including intravenous (IV) medications, endotracheal intubation and/or admission to intensive care.<sup>9-11</sup> Management of acute severe asthma is complicated by a number of problems, including a large number of treatment options, wide variation in self-reported and actual physician practice,<sup>12-15</sup> and a weak evidence base.<sup>16,17</sup>

Early initiation of therapy in the pre-hospital setting may abort an asthma attack and prevent further escalation on arrival to the ED. This in turn may prevent the need for more invasive treatment and potential complications or side effects of medications used in escalation. The introduction of a new treatment protocol emphasizing early use of systemic corticosteroids in a large Emergency Medical Services system was associated with reduced rates of hospitalization, less need for critical care and shortened hospital length of stay.<sup>18</sup> Systemic corticosteroid administration has been the subject of successful improvement projects in the pre-hospital setting.<sup>19</sup> However, a separate study identified high rates of paramedic non-compliance with pre-hospital treatment protocols recommending parenteral adrenaline for children with high-severity respiratory distress.<sup>20</sup>

1  
2  
3 There are little data available on treatment patterns or pre-hospital outcomes for children  
4 with acute asthma in the Australian setting. This study aimed to extract information from the  
5 electronic medical records of Ambulance Victoria (AV), Australia, on all children treated for  
6 asthma to understand the incidence of and patterns of “escalated” care (care in addition to  
7 standard treatment with systemic corticosteroids and inhaled bronchodilators).  
8  
9  
10  
11  
12  
13  
14  
15  
16  
17

## 18 **Methods**

### 19 ***Study design***

20  
21 This was a retrospective cohort study of all children who were either given a final diagnosis  
22 of asthma by the treating AV paramedics or treated with inhaled bronchodilators from 1 July  
23 2019 to 30 June 2020. The project is reported according to the Strengthening the Reporting  
24 of Observational Studies in Epidemiology (STROBE) statement.<sup>21</sup> The study was approved by  
25 the Royal Children’s Hospital Research Ethics and Governance Office, Melbourne, Australia  
26 (60707) and the Ambulance Victoria Research Governance Committee, Melbourne, Australia.  
27  
28  
29  
30  
31  
32  
33  
34  
35  
36  
37  
38  
39

### 40 ***Study setting***

41  
42 AV is the single public emergency medical service for the state of Victoria, Australia  
43 (population of 6.5 million over 227,000 square kilometres).  
44  
45

46  
47 AV clinical practice guidelines<sup>22</sup> provide recommendations for asthma management according  
48 to severity (Box 1), which include: inhaled salbutamol via a pressurised metered dose inhaler  
49 (pMDI) as initial treatment for mild / moderate asthma; nebulised salbutamol and  
50 ipratropium reserved for severe or critical illness, or failure of moderate asthma to respond  
51 to treatment after 20 minutes; corticosteroids (intravenous or oral dexamethasone) for  
52 critical asthma in children and for severe and critical asthma in adults; parenteral adrenaline  
53  
54  
55  
56  
57  
58  
59  
60



1  
2  
3 (intramuscular, intravenous infusion or titrated boluses) for critical asthma; and assisted  
4  
5 ventilation and/or intubation for unconsciousness or respiratory arrest. Children aged 12  
6  
7 years or more are managed according to an “adult” algorithm, which has a lower threshold  
8  
9 for corticosteroids compared to the paediatric algorithm (recommended for all severe cases,  
10  
11 rather than only in critical illness) .<sup>22</sup>  
12  
13  
14  
15  
16  
17

### 18 ***Selection of participants.***

19  
20 We searched the AV electronic patient care system for presentations of children aged more  
21  
22 than one year and less than 18 years matching the following criteria: final primary assessment  
23  
24 of asthma or cough or shortness of breath. We excluded children with a paramedic diagnosis  
25  
26 of cough or shortness of breath if they were not administered any inhaled bronchodilator  
27  
28 (salbutamol or ipratropium). Records of cases assessed by multiple ambulance teams during  
29  
30 the same incident were unified as a single paramedic attendance. Interhospital transports  
31  
32 and patients managed for cardiac arrest were excluded.  
33  
34  
35  
36  
37  
38  
39

### 40 ***Data collection***

41  
42 Data were extracted directly from the AV medical record database into a purpose-designed  
43  
44 spreadsheet and analysed. Exact medication doses were not extracted, as treatment is highly  
45  
46 protocolised (Box 1).  
47  
48

49 We defined “respiratory support” as the use of continuous positive airway pressure (CPAP),  
50  
51 bi-level positive airway pressure (BiPAP), assisted ventilation, intubation and mechanical  
52  
53 ventilation, or application of a bag-valve-mask device.  
54  
55

56 We defined “escalation” of care as parenteral administration of adrenaline, or provision of  
57  
58 respiratory support. Although AV protocols recommend oral (or parenteral) corticosteroids  
59  
60

1  
2  
3 for severe and critical asthma, corticosteroids are usually considered part of routine asthma  
4 care (rather than reserved for critical illness). We did not include nebulised adrenaline for  
5 suspected croup / upper airway obstruction. The case notes were reviewed and verified by a  
6 second paramedic abstractor (BD) for all patients where escalation was identified through  
7 electronic medical record data.  
8  
9  
10  
11  
12  
13  
14  
15  
16  
17

### 18 ***Analysis***

19  
20 Descriptive statistics were used to summarise patient characteristics, clinical features and  
21 treatments administered. Non-parametric data is reported using median and interquartile  
22 range (IQR), while categorical data is presented as count and percentage. We did not impute  
23 any missing data.  
24  
25  
26  
27  
28

29  
30 Comparisons were made between those requiring escalation of care to those not requiring  
31 escalation of care. Categorical data is compared using Chi-square test or Fisher's exact test as  
32 appropriate. Non-parametric data is compared using Mann-Whitney U test.  
33  
34  
35  
36

37 All analyses were performed using SPSS for Windows (IBM Corp. Released 2021. IBM SPSS  
38 Statistics for Windows, Version 28.0. Armonk, NY: IBM Corp.).  
39  
40  
41  
42  
43  
44

### 45 ***Patient and public involvement***

46  
47 Patients were not involved in the design of this study.  
48  
49  
50  
51

### 52 **Results**

53  
54 Over the study period, the service responded to 633,950 on-road emergency cases,<sup>23</sup> mainly  
55 using advanced life support (ALS) or mobile intensive care ambulance (MICA) paramedics. We  
56 identified 3,587 children who had been assessed by AV with a primary assessment diagnosis  
57  
58  
59  
60

1  
2  
3 of asthma, cough, or shortness of breath, 1,520 were excluded, leaving 1,572 children  
4 managed by AV with asthma (figure 1).  
5  
6

7  
8 The median age of the cohort was 6 years (IQR 4-10 years) and 888 (56.5%) were male. Most  
9  
10 (87.6%) patients had a documented past history of asthma, 115 (7.3%) had been hospitalised,  
11  
12 63 (4%) had required intensive care admission, and 19 (1.2%) had been intubated for a  
13  
14 previous asthma exacerbation. Information on usual asthma medications was not available.  
15  
16 The median initial respiratory rate was 32 breaths/minute (IQR 24 – 40 breaths/minute). Of  
17  
18 the 1,460 patients who had initial work of breathing documented, 978 (67.0%) had normal or  
19  
20 mild work of breathing, and 166 (7.7%) had severe work of breathing.  
21  
22  
23

24  
25 Ambulance response time was a median of 11.9 minutes (IQR 8.2 to 15.2 minutes);  
26  
27 paramedics were on the scene with the patient for a median of 17 minutes (IQR 12.7 to 25.1  
28  
29 minutes). Patients were transported by ambulance in 90% (n=1419) of attendances.  
30  
31

32  
33 Paramedics administered inhaled bronchodilators in 946 (60.2%) of cases. Of those, 493  
34  
35 (52.1%) received salbutamol alone, 13 (1.4%) received ipratropium alone, and 440 (46.5%)  
36  
37 received salbutamol and ipratropium. For those receiving bronchodilators, a median (IQR) of  
38  
39 1 (1-2) administrations were recorded. Oxygen administration was documented in 306  
40  
41 (19.4%) patients, most commonly by nebuliser mask, nasal cannulae, or an oxygen mask;  
42  
43 however, 514 (32.6%) received nebulised medication, driven by oxygen. Oral corticosteroids  
44  
45 were administered to 141 (9.0%) patients.  
46  
47  
48

49  
50 Twenty-six records were reviewed for escalation of care; in four patients the electronic record  
51  
52 was incorrectly coded, due to inadvertent selection of intravenous salbutamol (used by AV  
53  
54 for pre-term labour) instead of nebulised salbutamol, leaving 22 (1.4%) patients with  
55  
56 escalated care (figure 1). Patients with escalated care were more likely to be older, had  
57  
58 previously required hospital admission for asthma and had severe respiratory distress at  
59  
60

1  
2  
3 initial assessment (Table 1). Those receiving escalated care were more likely to be treated  
4  
5 with inhaled bronchodilators, corticosteroids and oxygen (Table 2). With increasing severity  
6  
7 of illness, children were more likely to be administered nebulised salbutamol, less likely to be  
8  
9 administered salbutamol by a pMDI, more likely to receive ipratropium and more likely to  
10  
11 receive systemic corticosteroids (Supplementary Online Table).  
12  
13

14  
15 All patients who received escalated care received parenteral adrenaline. No patients received  
16  
17 non-invasive ventilation, assisted ventilation or intubation. Four children (aged two, fourteen,  
18  
19 sixteen and seventeen years) received an adrenaline infusion. One patient who received IM  
20  
21 adrenaline also had a bag-valve-mask applied, however, did not receive positive pressure  
22  
23 ventilation. They were a two-year-old child who had difficulty breathing and cough that was  
24  
25 not improving with salbutamol administered at home. They became unresponsive after a  
26  
27 coughing episode and bystander cardiopulmonary resuscitation was initiated. They were  
28  
29 breathing spontaneously and responsive upon initial paramedic assessment.  
30  
31  
32  
33

34  
35 Reports of respiratory status at initial assessment and hospital arrival were available for 1307  
36  
37 (85.5%) of the cohort. On arrival to hospital the respiratory status of children had improved  
38  
39 overall (normal/mild respiratory distress at initial assessment 847 (64.8%), normal/mild  
40  
41 respiratory distress at hospital arrival 1142 (87.4%),  $p < 0.0001$ ). One hundred and thirty-one  
42  
43 (81.2%) of the 160 children with severe respiratory distress at initial assessment had  
44  
45 improved. Of the 847 children with normal/mild respiratory distress at initial assessment, only  
46  
47 24 (2.8%) were documented as having moderate or severe respiratory distress at hospital  
48  
49 arrival; and only 9 (0.8%) of the 1146 children with normal/mild/moderate respiratory  
50  
51 distress at initial assessment were documented as having severe respiratory distress at  
52  
53 hospital arrival (Figure 2).  
54  
55  
56  
57  
58  
59  
60

## **Discussion.**

This study provides a population-based state-wide assessment of pre-hospital asthma management in children. Most children with acute exacerbations of asthma in Victoria, Australia, did not receive escalated therapy during their pre-hospital treatment from ambulance paramedics. Although more than 60% had either mild or no respiratory distress, over 90% of all patients were transported to hospital. Overall, the respiratory status of children improved from ambulance arrival to hospital arrival in all severity categories.

The overall rate of parenteral bronchodilator (adrenaline) administration was 1.6%. No patients received non-invasive ventilation, assisted ventilation or intubation, and most patients were treated with inhaled bronchodilators and clinically improved by the time they arrived in hospital. Those receiving escalated care were older, were more likely to have a history of asthma requiring hospital admission and/or intubation and have severe respiratory distress on ambulance arrival.

A recent large study described in-hospital management of acute asthma exacerbations in Australia and New Zealand. In 14,029 children, there was a higher overall rates of escalated therapy (7.3% overall, with 4.2% receiving parenteral bronchodilators and 4.3% respiratory support).<sup>24</sup> A common indication for escalation of care is failure to adequately respond to first-line therapy. The relatively low rates of treatment escalation in the pre-hospital setting (1.6%) suggests that a small proportion of children are seriously ill, while most are early in their treatment, and may not have had sufficient time to demonstrate improvement (or lack of improvement) prior to hospital arrival.

There is little evidence to guide escalated therapy for asthma. A recent Overview of Cochrane reviews of clinical trials on escalated therapy for asthma<sup>16</sup> assessed the evidence for parenteral bronchodilators, Heliox, respiratory support and inhaled magnesium. The review

1  
2  
3 found that the majority of comparisons involved between one and three trials and fewer than  
4  
5 100 participants, making it difficult to assess the balance between benefits and potential  
6  
7 harms. The authors were unable to make firm practice recommendations.<sup>16</sup>  
8  
9

10 There is little evidence to support intramuscular adrenaline as first-line treatment for  
11  
12 seriously ill children with asthma,<sup>25</sup> although it has a number of advantages, including ease of  
13  
14 administration and paramedic familiarity. Parenteral adrenaline is also used for anaphylaxis,  
15  
16 cardiac arrest, and management of hypotension, while nebulised adrenaline is used for severe  
17  
18 upper airway obstruction in croup. In addition, it can be easily and rapidly administered as  
19  
20 there is no need for dilution prior to administration, and no requirement for a prolonged  
21  
22 infusion.<sup>22</sup>  
23  
24  
25  
26

27 Pre-hospital treatment of asthma rarely results in escalation of therapy beyond inhaled  
28  
29 bronchodilators and systemic corticosteroids. In addition, the use of parenteral  
30  
31 bronchodilators is often reserved for those who do not improve after initial inhaled  
32  
33 bronchodilators, and is administered relatively late in the course of an ED visit.<sup>15</sup> Given that  
34  
35 most children with asthma will improve with pre-hospital treatment, and/or will not have  
36  
37 sufficient time to “fail to improve” with standard therapy, it appears that any comparative  
38  
39 clinical trials to determine the superiority of one parenteral bronchodilator over another  
40  
41 should be reserved for the in-hospital rather than pre-hospital setting.  
42  
43  
44  
45  
46  
47  
48  
49

### 50 **Limitations**

51  
52 Inclusion in the study was based on a combination of paramedic diagnosis of asthma and  
53  
54 administration of inhaled bronchodilators. While only 89% had a diagnosis of asthma  
55  
56 recorded in the ambulance notes, it seems that the cohort is reflective of the asthma  
57  
58 population as over 87% of cases had a previous diagnosis of asthma.  
59  
60

1  
2  
3 Due to state-wide data collection and large numbers of patients, our study is likely to be  
4 generalisable to other settings with similar pre-hospital care systems. However, most  
5  
6 generalisable to other settings with similar pre-hospital care systems. However, most  
7  
8 ambulance cases within Victoria are concentrated in the metropolitan area of Melbourne (the  
9  
10 capital city), which may limit generalisability to rural and regional settings. Approximately 10%  
11  
12 of children were not transported to hospital; this is similar to the rate identified in a study of  
13  
14 children with seizures from the same ambulance service.<sup>26</sup>  
15  
16

17  
18 This study is a retrospective review of a comprehensive electronic database. We optimised  
19  
20 data extraction and minimised bias through the collection of variables using a piloted data  
21  
22 collection instrument, and application of pre-defined inclusion and exclusion criteria.<sup>27,28</sup> Due  
23  
24 to the nature of record-keeping within the ambulance service (all cases are documented using  
25  
26 the electronic system), it is unlikely that any cases of escalated care were missed. As we  
27  
28 downloaded fields directly from the electronic medical record system, we did not  
29  
30 independently abstract any variables. However, we verified all instances of documented  
31  
32 escalation of care through consultation with a second (paramedic) reviewer and identified  
33  
34 four cases of misclassification. It is possible that we missed some children who were not  
35  
36 classified as asthma, were critically ill, not given inhaled bronchodilators and only given  
37  
38 parenteral adrenaline. However, this is likely to be a very small number of cases. There was  
39  
40 some missing data on final observations on arrival to hospital, however, this was not a primary  
41  
42 objective of our study.  
43  
44  
45  
46  
47  
48  
49  
50  
51

## 52 **Conclusions**

53  
54 Most children with acute exacerbations of asthma did not receive escalated therapy during  
55  
56 their pre-hospital treatment from ambulance paramedics. Most patients were treated with  
57  
58 inhaled bronchodilators only and clinically improved by the time they arrived in hospital. Due  
59  
60

1  
2  
3 to the very low incidence of treatment escalation or clinical deterioration, any comparative  
4  
5 clinical trials to determine the superiority of one parenteral bronchodilator over another  
6  
7  
8 should be reserved for the in-hospital rather than pre-hospital setting.  
9  
10  
11  
12  
13  
14

### 15 **Funding**

16  
17  
18 This work is supported by the NHMRC Centre of Research Excellence in Paediatric Emergency  
19  
20 Medicine (GNT1171228), Canberra, Australia. SC's contribution was funded by the Thoracic  
21  
22 Society of Australia and New Zealand and National Asthma Council Fellowship, 2020 and the  
23  
24 Australasian College for Emergency Medicine Foundation Al Spilman Early Career Research  
25  
26 Grant 2017. SRDs time was in part funded by Cure Kids New Zealand. FEB's time was funded  
27  
28 by an NHMRC Investigator Leadership grant and the Royal Children's Hospital Foundation,  
29  
30 Parkville, Australia.  
31  
32  
33  
34  
35  
36  
37  
38  
39  
40  
41  
42  
43  
44  
45  
46

47 Figure 1. Flow chart – pre-hospital management of acute asthma in children.  
48  
49  
50  
51  
52  
53  
54  
55  
56  
57  
58  
59  
60



1  
2  
3  
4  
5  
6  
7  
8  
9  
10  
11  
12  
13  
14  
15  
16  
17  
18  
19  
20  
21  
22  
23  
24  
25  
26  
27  
28  
29  
30  
31  
32  
33  
34  
35  
36  
37  
38  
39  
40  
41  
42  
43  
44  
45  
46  
47  
48  
49  
50  
51  
52  
53  
54  
55  
56  
57  
58  
59  
60

AV, Ambulance Victoria.

For peer review only

1  
2  
3  
4  
5  
6 **Box 1.** Asthma severity assessment and treatment according to Ambulance Victoria Clinical  
7 Practice Guidelines  
8  
9

10 **Mild / Moderate:** normal conscious state, some increased work of breathing, tachycardia,  
11 speaking in phrases / sentences  
12

- 13 - Salbutamol pMDI and spacer:
  - 14 ○ 6 or more years: 4-12 doses
  - 15 ○ 2-5 years: 2-6 doses

16  
17  
18 **Severe:** agitated / distressed, markedly increased work of breathing, including accessory  
19 muscle use / retraction, tachycardia, speaking in words.  
20

- 21 - Salbutamol nebulised (repeated at 20 minutes if required)
  - 22 ○ 2-4 years: 2.5 mg
  - 23 ○ 5-11 years: 2.5 - 5 mg
- 24 - Ipratropium bromide nebulised 250 mcg

25  
26  
27  
28 **Critical:** altered conscious state, maximal work of breathing, marked tachycardia, unable to  
29 talk.  
30

- 31 - Salbutamol nebulised 10 mg (repeated at 5 minutes if required)
  - 32 - Ipratropium bromide nebulised 250 mcg
  - 33 - Adrenaline 10 mcg/kg IM (repeated at 5 minutes if required)
  - 34 - Dexamethasone 0.6 mg/kg IV or oral (max 12 mg)
  - 35 - Adrenaline IV boluses and infusion (for Mobile Intensive Care Paramedics)
- 36  
37  
38  
39  
40  
41  
42  
43  
44  
45  
46  
47  
48  
49  
50  
51  
52  
53  
54  
55  
56  
57  
58  
59  
60

**Table 1.** Demographics and clinical characteristics of children treated or assessed for asthma by AV.

|                                                    | Total<br>(n=1572)  | Escalation<br>of care<br>(n=22) | No<br>escalation<br>of care<br>(n=1550) | P value<br>(escalation<br>vs no<br>escalation) |
|----------------------------------------------------|--------------------|---------------------------------|-----------------------------------------|------------------------------------------------|
| Age, years, n (%)                                  |                    |                                 |                                         |                                                |
| 1-4                                                | 561 (36.3)         | 6 (27.3)                        | 555 (35.8)                              | 0.38                                           |
| 5-11                                               | 690 (43.9)         | 9 (40.9)                        | 681 (43.9)                              |                                                |
| 12-17                                              | 321 (20.4)         | 7 (31.8)                        | 314 (20.3)                              |                                                |
| Median age, years (IQR)                            | 6 (4-10)           | 10.5 (3.8 –<br>14.3)            | 6 (3.8 –<br>10)                         | 0.045                                          |
| Female sex, n (%)                                  | 684 (43.5)         | 11 (50)                         | 877 (43.4)                              | 0.54                                           |
| Pre-existing conditions, n (%)                     |                    |                                 |                                         |                                                |
| Asthma                                             | 1377 (87.6)        | 20 (90.9)                       | 1357<br>(87.5)                          | 0.64                                           |
| Requiring hospital admission                       | 115 (7.3)          | 5 (22.7)                        | 110 (7.1)                               | 0.005                                          |
| Requiring intensive care                           | 63 (4)             | 1 (4.5)                         | 62 (4)                                  | 0.89                                           |
| Requiring intubation                               | 19 (1.2)           | 1 (4.5)                         | 18 (1.2)                                | 0.15                                           |
| With cardiac / respiratory arrest                  | 5 (0.3)            | 0 (0)                           | 5 (0.3)                                 | 0.79                                           |
| Other respiratory illness                          |                    |                                 |                                         |                                                |
| Croup                                              | 94 (6)             | 1 (4.5)                         | 93 (6)                                  | 0.78                                           |
| Bronchiolitis                                      | 80 (5.1)           | 1 (4.5)                         | 79 (5.1)                                | 0.91                                           |
| Pneumonia                                          | 44 (2.8)           | 1 (4.5)                         | 43 (2.8)                                | 0.62                                           |
| Chest infection                                    | 32 (2)             | 1 (4.5)                         | 31 (2)                                  | 0.40                                           |
| Other                                              | 8 (0.5)            | 0 (0)                           | 8 (0.5)                                 | 0.64                                           |
| Initial physiological parameters                   |                    |                                 |                                         |                                                |
| Respiratory rate (breaths/minute),<br>median (IQR) | 32 (24 – 40)       | 35.5 (28 –<br>48.5)             | 32 (24 –<br>40)                         | 0.09                                           |
| Pulse rate (beats/minute), median<br>(IQR)         | 130 (112 –<br>146) | 134.5 (120<br>– 150.5)          | 130 (112<br>– 146)                      | 0.24                                           |
| Initial respiratory status, n (%)                  |                    |                                 |                                         |                                                |
| Normal                                             | 615 (39.1)         | 3 (13.6)                        | 612 (39.5)                              | <0.001                                         |
| Mild respiratory distress                          | 363 (23.1)         | 1 (4.5)                         | 362 (23.4)                              |                                                |
| Moderate respiratory distress                      | 315 (20)           | 2 (9.1)                         | 313 (20.2)                              |                                                |
| Severe respiratory distress                        | 166 (10.6)         | 16 (72.7)                       | 150 (9.7)                               |                                                |
| Depressed respirations                             | 1 (0.1)            | 0 (0)                           | 1 (0.1)                                 |                                                |
| Final physiological parameters                     |                    |                                 |                                         |                                                |

|                                                   |                 |                 |               |        |
|---------------------------------------------------|-----------------|-----------------|---------------|--------|
| Respiratory rate (breaths/minute), median (IQR) † | 28 (22 – 36)    | 28 (22 – 36)    | 30 (27 – 40)  | 0.06   |
| Pulse rate (beats/minute), median (IQR) †         | 126 (108 – 142) | 126 (108 – 142) | 126 (112-162) | 0.29   |
| Final respiratory status, n (%)‡                  |                 |                 |               |        |
| Normal                                            | 742 (56.8)      | 4 (18.2)        | 738 (57.4)    | <0.001 |
| Mild respiratory distress                         | 400 (30.6)      | 4 (18.2)        | 396 (30.8)    |        |
| Moderate respiratory distress                     | 127 (9.7)       | 6 (27.3)        | 121 (9.4)     |        |
| Severe respiratory distress                       | 38 (2.9)        | 8 (36.4)        | 30 (2.4)      |        |

All P values calculated using Chi-Square tests, except for continuous variables where Mann-Whitney U tests\* were used.

† Data was not available for final pulse rate and respiratory rate for 54 patients in the “No escalation of care” group

‡ Data was not available for final respiratory status for 265 patients in the “No escalation of care” group

**Table 2.** Treatment provided by AV paramedics.

|                                                                                                               | Total<br>(n=1572) | Escalation of<br>care<br>(n=22) | No escalation<br>of care<br>(n=1550) | P value<br>(escalation<br>vs no<br>escalation) |
|---------------------------------------------------------------------------------------------------------------|-------------------|---------------------------------|--------------------------------------|------------------------------------------------|
| Respiratory support, n(%)                                                                                     |                   |                                 |                                      |                                                |
| Bag-valve-mask applied                                                                                        | 1 (0.1)           | 1 (4.5)                         | 0 (0)                                | <0.001                                         |
| Oxygen delivery                                                                                               |                   |                                 |                                      |                                                |
| Nasal cannulae                                                                                                | 46 (2.9)          | 4 (18.2)                        | 42 (2.7)                             | <0.001                                         |
| Nebuliser mask                                                                                                | 258 (16.4)        | 10 (45.5)                       | 248 (16)                             | <0.001                                         |
| Oxygen mask                                                                                                   | 48 (3.1)          | 0 (0)                           | 48 (3.1)                             | 0.40                                           |
| Non-rebreather mask                                                                                           | 8 (0.5)           | 0 (0)                           | 8 (0.5)                              | 0.74                                           |
| Other oxygen therapy<br>(not otherwise specified)                                                             | 2 (0.1)           | 0 (0)                           | 2 (0.1)                              | 0.87                                           |
| Parenteral bronchodilator                                                                                     |                   |                                 |                                      |                                                |
| Adrenaline IM injection                                                                                       | 20 (1.3)          | 20 (90.9)                       | 0 (0)                                | <0.001                                         |
| Adrenaline infusion                                                                                           | 4 (0.3)           | 4 (18.2)                        | 0 (0)                                | <0.001                                         |
| Dexamethasone                                                                                                 |                   |                                 |                                      |                                                |
| IV injection                                                                                                  | 25 (1.6)          | 4 (18.2)                        | 21 (1.4)                             | <0.001                                         |
| Oral                                                                                                          | 141 (9)           | 11 (50)                         | 130 (8.4)                            | <0.001                                         |
| Inhaled bronchodilator                                                                                        |                   |                                 |                                      |                                                |
| Any inhaled bronchodilator                                                                                    | 946 (60.2)        | 21 (95.5)                       | 925 (59.7)                           | <0.001                                         |
| Any Ipratropium bromide<br>nebulisation                                                                       | 453 (28.8)        | 17 (77.3)                       | 436 (28.1)                           | <0.001                                         |
| Any Salbutamol pMDI                                                                                           | 465 (29.6)        | 3 (13.6)                        | 462 (29.8)                           | 0.10                                           |
| Any Salbutamol<br>nebulisation                                                                                | 513 (32.6)        | 20 (90.9)                       | 493 (31.8)                           | <0.001                                         |
| Single administration of<br>inhaled salbutamol                                                                | 348 (22.1)        | 3 (13.6)                        | 345 (22.3)                           |                                                |
| Single administration of<br>inhaled ipratropium bromide                                                       | 13 (0.8)          | 1 (4.5)                         | 12 (0.8)                             |                                                |
| Single administration of<br>inhaled salbutamol and single<br>administration of inhaled<br>ipratropium bromide | 280 (17.8)        | 6 (27.3)                        | 274 (17.7)                           |                                                |
| Two administrations of<br>inhaled salbutamol alone                                                            | 114 (7.3)         | 1 (4.5)                         | 113 (7.3)                            |                                                |
| Two administrations of<br>inhaled salbutamol and at                                                           | 112 (7.1)         | 3 (13.6)                        | 109 (7)                              |                                                |

|                                                                                                            |          |             |           |        |
|------------------------------------------------------------------------------------------------------------|----------|-------------|-----------|--------|
| least one administration of ipratropium bromide                                                            |          |             |           |        |
| Three or more administrations of inhaled salbutamol alone                                                  | 31 (2.0) | 0 (0)       | 31 (2)    |        |
| Three or more administrations of inhaled salbutamol and at least one administration of ipratropium bromide | 48 (3.1) | 7 (31.8)    | 41 (2.6)  |        |
| Total instances of inhaled bronchodilator administration, median (IQR)                                     | 1 (0-2)  | 2 (1.8 – 4) | 1 (0 – 2) | <0.001 |
| Intravenous access                                                                                         |          |             |           |        |
| Intravenous access attempt                                                                                 | 39 (2.5) | 7 (31.8)    | 32 (2.1)  | <0.001 |
| Successful IV attempt                                                                                      | 34 (2.2) | 7 (31.8)    | 27 (1.7)  | <0.001 |

No patients received any of: BIPAP, manual ventilation, mechanical ventilation, IV salbutamol infusion, IM dexamethasone.

**Figure 2.** Initial and final respiratory status documented by AV paramedics.

For peer review only

Note: 111 patients missing initial respiratory status, and 265 missing final respiratory status.

### **Contributorship statement**

SC, CW and FEB identified the research question. SC and CLW were responsible for the study design and research protocol. BD and ZN obtained data and input into data cleaning and analysis. SC was responsible for statistical analysis. SC drafted the initial manuscript. SC, BD, ZN, CLW, SRD, GMN, CVEP, AG and FEB contributed equally to writing, reviewing and editing the manuscript.

All authors provided comments on the drafts and have read and approved the final version of the article. All authors has full access to all of the data (including statistical reports and tables) at the conclusion of the study and take responsibility for the integrity of the data and the accuracy of the data analysis.

SC is the guarantor for the paper, accepts full responsibility for the work and/or the conduct of the study, had access to the data and controlled the decision to publish.

### **Competing interests**

There are no competing interests for any author.

### **Funding**

SC has received funding from a Thoracic Society of Australia and New Zealand / National Asthma Council Fellowship and the ACEM Foundation Al Spilman Early Career Research Grant 2017.

SRD's time is funded in part by Cure Kids New Zealand

FEB's time was part funded by a grant from the Royal Children's Hospital Foundation, Melbourne, Victoria, Australia; an NHMRC (National Health and Medical Research Council) Practitioner Fellowship; and an NHMRC Investigator Leadership Grant (GNT1171228).

ZN's time is part funded by a grant from the National Heart Foundation of Australia.

### **Data sharing statement**

Data are available on reasonable request. De-identified participant data will be available for sharing from 1 July 2024. Any data access requests should be sent to SC (simon.craig@monash.edu), and should include a proposal from the individual or organisation regarding their plan for use of the data.

The study team will review the request and consider the scientific merit of the proposed use of the data, and the legal, regulatory and ethical issues pertinent to the request. Presuming all constraints are addressed, the data will be shared using a secure file transfer platform.

### **Ethical statement.**

The project was approved by the Royal Children's Hospital Research Ethics and Governance Office, Melbourne, Australia (60707), and the Ambulance Victoria Research Governance Committee, Melbourne, Australia.



## References

1. Alpern ER, Stanley RM, Gorelick MH, et al. Epidemiology of a pediatric emergency medicine research network: the PECARN Core Data Project. *Pediatric emergency care* 2006; **22**(10): 689-99.
2. Acworth J, Babl F, Borland M, et al. Patterns of presentation to the Australian and New Zealand Paediatric Emergency Research Network. *Emerg Med Australas* 2009; **21**(1): 59-66.
3. Weiss AJ, Wier LM, Stocks C, Blanchard J. Overview of Emergency Department Visits in the United States, 2011: Statistical Brief #174. Healthcare Cost and Utilization Project (HCUP) Statistical Briefs. Rockville (MD): Agency for Healthcare Research and Quality (US); 2006.
4. Nath JB, Hsia RY. Children's emergency department use for asthma, 2001-2010. *Academic pediatrics* 2015; **15**(2): 225-30.
5. Kantor DB, Phipatanakul W. Intravenous beta agonists and severe pediatric asthma exacerbation: time for a closer look at terbutaline? *Ann Allergy Asthma Immunol* 2014; **112**(3): 187.
6. Giordano K, Rodriguez E, Green N, et al. Pulmonary Function Tests in Emergency Department Pediatric Patients with Acute Wheezing/Asthma Exacerbation. *Pulmonary Medicine* 2012; **2012**: 724139.
7. Kelly AM, Kerr D, Powell C. Is severity assessment after one hour of treatment better for predicting the need for admission in acute asthma? *Respir Med* 2004; **98**(8): 777-81.
8. Powell CV, Kelly AM, Kerr D. Lack of agreement in classification of the severity of acute asthma between emergency physician assessment and classification using the National Asthma Council Australia guidelines (1998). *Emergency medicine (Fremantle, WA)* 2003; **15**(1): 49-53.
9. O'Connor MG, Saville BR, Hartert TV, Arnold DH. Treatment Variability of Asthma Exacerbations in a Pediatric Emergency Department Using a Severity-Based Management Protocol. *Clinical pediatrics* 2014; **53**(13): 1288-90.
10. Biagini Myers JM, Simmons JM, Kercksmar CM, et al. Heterogeneity in asthma care in a statewide collaborative: the Ohio Pediatric Asthma Repository. *Pediatrics* 2015; **135**(2): 271-9.
11. Morris I, Lyttle MD, O'Sullivan R, Sargant N, Doull IJ, Powell CV. Which intravenous bronchodilators are being administered to children presenting with acute severe wheeze in the UK and Ireland? *Thorax* 2015; **70**(1): 88-91.
12. Craig S, Powell CVE, Nixon GM, et al. Treatment patterns and frequency of key outcomes in acute severe asthma in children: a Paediatric Research in Emergency Departments International Collaborative (PREDICT) multicentre cohort study. *BMJ Open Respir Res* 2022; **9**(1).
13. Monteverde-Fernandez N, Diaz-Rubio F, Vásquez-Hoyos P, Rotta AT, González-Dambrasuskas S. Variability in care for children with severe acute asthma in Latin America. *Pediatr Pulmonol* 2021; **56**(2): 384-91.
14. Kalburgi S, Halley T. High-Flow Nasal Cannula Use Outside of the ICU Setting. *Pediatrics* 2020; **146**(5).
15. Johnson MD, Zorc JJ, Nelson DS, et al. Intravenous Magnesium in Asthma Pharmacotherapy: Variability in Use in the PECARN Registry. *J Pediatr* 2020; **220**: 165-74.e2.

16. Craig SS, Dalziel SR, Powell CV, Graudins A, Babl FE, Lunny C. Interventions for escalation of therapy for acute exacerbations of asthma in children: an overview of Cochrane Reviews. *Cochrane Database Syst Rev* 2020; **8**: Cd012977.
17. Gray CS, Powell CVE, Babl FE, Dalziel SR, Craig S. Variability of outcome measures in trials of intravenous therapy in acute severe paediatric asthma: a systematic review. *Emerg Med J* 2019; **36**(4): 225-30.
18. Nassif A, Ostermayer DG, Hoang KB, Claiborne MK, Camp EA, Shah MI. Implementation of a Prehospital Protocol Change For Asthmatic Children. *Prehosp Emerg Care* 2018; **22**(4): 457-65.
19. Riney LC, Schwartz H, Murtagh Kurowski E, Collett L, Florin TA. Improving Administration of Prehospital Corticosteroids for Pediatric Asthma. *Pediatr Qual Saf* 2021; **6**(3): e410.
20. Cheetham AL, Navanandan N, Leonard J, Spaur K, Markowitz G, Adalgais KM. Impact of prehospital pediatric asthma management protocol adherence on clinical outcomes. *J Asthma* 2022; **59**(5): 937-45.
21. von Elm E, Altman DG, Egger M, Pocock SJ, Gøtzsche PC, Vandenbroucke JP. The Strengthening the Reporting of Observational Studies in Epidemiology (STROBE) statement: guidelines for reporting observational studies. *Ann Intern Med* 2007; **147**(8): 573-7.
22. Ambulance Victoria. Clinical Practice Guidelines for Ambulance and MICA Paramedics. January 2018. Ambulance Victoria, Doncaster.  
[Online resource: Available from: <https://www.ambulance.vic.gov.au/wp-content/uploads/2019/07/Clinical-Practice-Guidelines-2018-Edition-1.9-1.pdf> Accessed 15/9/2022].
23. Ambulance Victoria Annual report 2019-20. Ambulance Victoria, Melbourne. 2020.  
[Online resource. Available from: <https://www.ambulance.vic.gov.au/about-us/our-performance/> Accessed 15/9/2022].
24. Craig S, Powell CVE, Nixon GM, et al. Treatment patterns and frequency of key outcomes in acute severe asthma in children: a Paediatric Research in Emergency Departments International Collaborative (PREDICT) multicentre cohort study. *BMJ Open Respir Res.* 2022 Mar;9(1):e001137. .
25. Hasegawa K, Craig SS, Teach SJ, Camargo CA Jr. Management of Asthma Exacerbations in the Emergency Department. *J Allergy Clin Immunol Pract.* 2020 Dec 31:S2213-2198(20)31399-4. .
26. Pfeiffer CK, Smith K, Bernard S, et al. Prehospital benzodiazepine use and need for respiratory support in paediatric seizures. *Emerg Med J* 2022; **39**(8): 608-15.
27. Gilbert EH, Lowenstein SR, Koziol-McLain J, Barta DC, Steiner J. Chart reviews in emergency medicine research: Where are the methods? *Ann Emerg Med* 1996; **27**(3): 305-8.
28. Kaji AH, Schriger D, Green S. Looking through the retrospectroscope: reducing bias in emergency medicine chart review studies. *Ann Emerg Med* 2014; **64**(3): 292-8.

**Supplementary Online Table**

## Administration of asthma treatment according to initial respiratory status

|                           | Normal respiratory status or mild respiratory distress (n=978) | Moderate respiratory distress (n=315) | Severe respiratory distress or Depressed respirations (n=167) |
|---------------------------|----------------------------------------------------------------|---------------------------------------|---------------------------------------------------------------|
| Salbutamol (pMDI)         |                                                                |                                       |                                                               |
| n (%)                     | 314 (32.1)                                                     | 111 (35.2)                            | 15 (9.0)                                                      |
| Median (IQR)              | 0 (0 – 1)                                                      | 0 (0 – 1)                             | 0 (0 – 0)                                                     |
| Salbutamol (nebuliser)    |                                                                |                                       |                                                               |
| n (%)                     | 155 (15.8)                                                     | 182 (57.8)                            | 151 (90.4)                                                    |
| Median (IQR)              | 0 (0 – 0)                                                      | 1 (0 – 1)                             | 1 (1 – 2)                                                     |
| Any salbutamol            |                                                                |                                       |                                                               |
| n (%)                     | 455 (46.5)                                                     | 274 (87.0)                            | 157 (94.0)                                                    |
| Median (IQR)              | 0 (0 – 0)                                                      | 1 (0 – 1)                             | 1 (1 – 2)                                                     |
| Ipratropium, n (%)        |                                                                |                                       |                                                               |
| n (%)                     | 125 (12.8)                                                     | 164 (52.1)                            | 144 (86.2)                                                    |
| Median (IQR)              | 0 (0 – 0)                                                      | 1 (0 – 1)                             | 1 (1 – 1)                                                     |
| Dexamethasone (any route) |                                                                |                                       |                                                               |
| Any route, n (%)          | 41 (4.2)                                                       | 56 (17.8)                             | 58 (34.8)                                                     |

1  
2  
3  
4  
5  
6  
7  
8  
9  
10  
11  
12  
13  
14  
15  
16  
17  
18  
19  
20  
21  
22  
23  
24  
25  
26  
27  
28  
29  
30  
31  
32  
33  
34  
35  
36  
37  
38  
39  
40  
41  
42  
43  
44  
45  
46  
47  
48  
49  
50  
51  
52  
53  
54  
55  
56  
57  
58  
59  
60

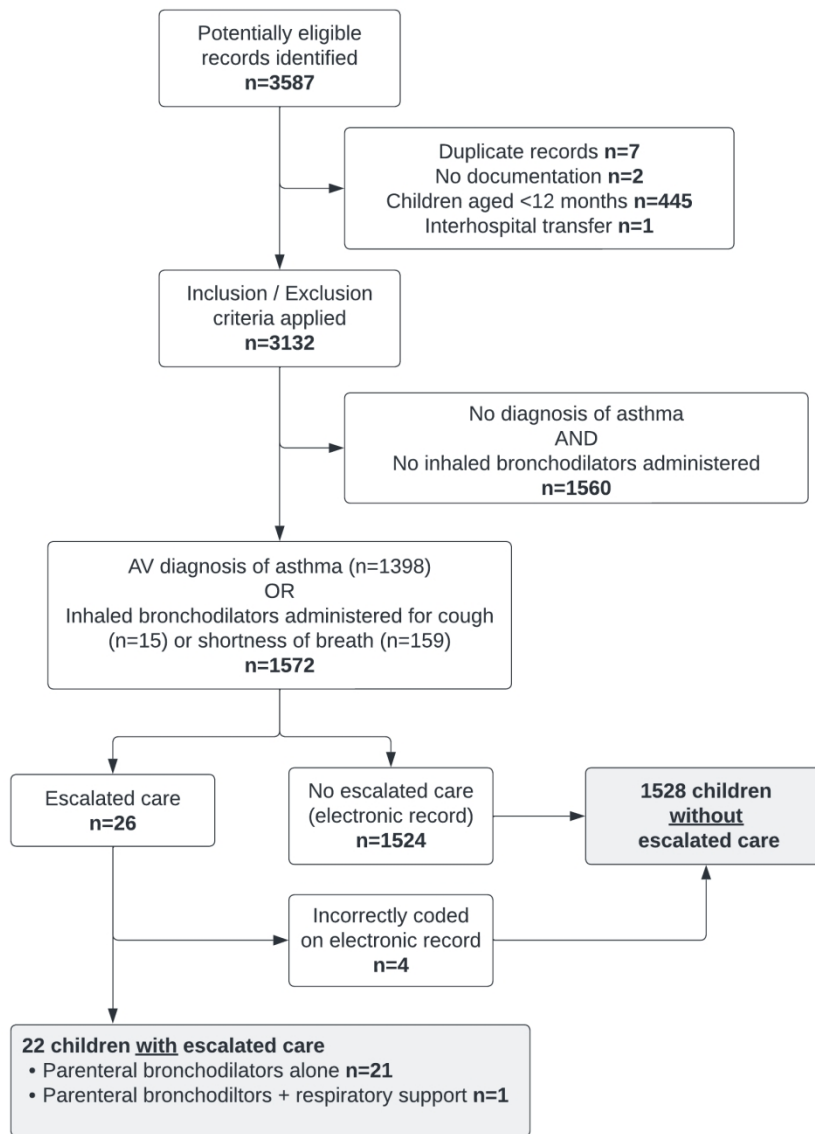

152x205mm (300 x 300 DPI)

1  
2  
3  
4  
5  
6  
7  
8  
9  
10  
11  
12  
13  
14  
15  
16  
17  
18  
19  
20  
21  
22  
23  
24  
25  
26  
27  
28  
29  
30  
31  
32  
33  
34  
35  
36  
37  
38  
39  
40  
41  
42  
43  
44  
45  
46  
47  
48  
49  
50  
51  
52  
53  
54  
55  
56  
57  
58  
59  
60

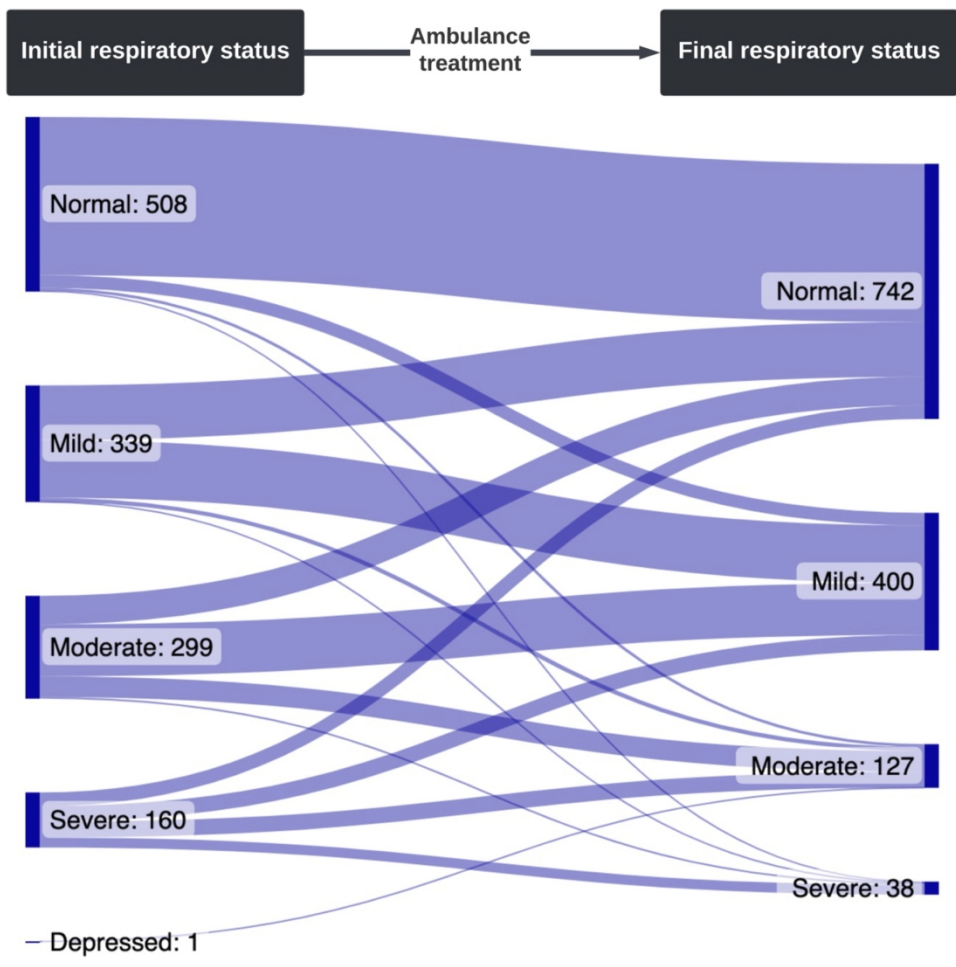

1328x1387mm (72 x 72 DPI)

## STROBE Statement—checklist of items that should be included in reports of observational studies

|                              | Item No | Recommendation                                                                                                                                                                                                                                                                                                                                                                                                                                                                                                                                                                                                                                                                                                                                          |
|------------------------------|---------|---------------------------------------------------------------------------------------------------------------------------------------------------------------------------------------------------------------------------------------------------------------------------------------------------------------------------------------------------------------------------------------------------------------------------------------------------------------------------------------------------------------------------------------------------------------------------------------------------------------------------------------------------------------------------------------------------------------------------------------------------------|
| <b>Title and abstract</b>    | 1       | (a) Indicate the study's design with a commonly used term in the title or the abstract<br><b>YES – see title.</b>                                                                                                                                                                                                                                                                                                                                                                                                                                                                                                                                                                                                                                       |
|                              |         | (b) Provide in the abstract an informative and balanced summary of what was done and what was found<br><b>Structured abstract provided</b>                                                                                                                                                                                                                                                                                                                                                                                                                                                                                                                                                                                                              |
| <b>Introduction</b>          |         |                                                                                                                                                                                                                                                                                                                                                                                                                                                                                                                                                                                                                                                                                                                                                         |
| Background/rationale         | 2       | Explain the scientific background and rationale for the investigation being reported<br><b>Page 7</b>                                                                                                                                                                                                                                                                                                                                                                                                                                                                                                                                                                                                                                                   |
| Objectives                   | 3       | State specific objectives, including any prespecified hypotheses<br><b>Page 8</b>                                                                                                                                                                                                                                                                                                                                                                                                                                                                                                                                                                                                                                                                       |
| <b>Methods</b>               |         |                                                                                                                                                                                                                                                                                                                                                                                                                                                                                                                                                                                                                                                                                                                                                         |
| Study design                 | 4       | Present key elements of study design early in the paper<br><b>Page 8 – (“study design” section)</b>                                                                                                                                                                                                                                                                                                                                                                                                                                                                                                                                                                                                                                                     |
| Setting                      | 5       | Describe the setting, locations, and relevant dates, including periods of recruitment, exposure, follow-up, and data collection<br><b>Page 8-9 (“study setting” section)</b>                                                                                                                                                                                                                                                                                                                                                                                                                                                                                                                                                                            |
| Participants                 | 6       | (a) <i>Cohort study</i> —Give the eligibility criteria, and the sources and methods of selection of participants. Describe methods of follow-up<br><i>Case-control study</i> —Give the eligibility criteria, and the sources and methods of case ascertainment and control selection. Give the rationale for the choice of cases and controls<br><i>Cross-sectional study</i> —Give the eligibility criteria, and the sources and methods of selection of participants<br>(b) <i>Cohort study</i> —For matched studies, give matching criteria and number of exposed and unexposed<br><i>Case-control study</i> —For matched studies, give matching criteria and the number of controls per case<br><b>Page 9 (“selection of participants” section)</b> |
| Variables                    | 7       | Clearly define all outcomes, exposures, predictors, potential confounders, and effect modifiers. Give diagnostic criteria, if applicable<br><b>Page 9-10 (“data collection” section)</b>                                                                                                                                                                                                                                                                                                                                                                                                                                                                                                                                                                |
| Data sources/<br>measurement | 8*      | For each variable of interest, give sources of data and details of methods of assessment (measurement). Describe comparability of assessment methods if there is more than one group<br><b>Page 9-10 (“data collection” section)</b>                                                                                                                                                                                                                                                                                                                                                                                                                                                                                                                    |
| Bias                         | 9       | Describe any efforts to address potential sources of bias<br><b>Page 10 (end of “data collection” section)</b>                                                                                                                                                                                                                                                                                                                                                                                                                                                                                                                                                                                                                                          |
| Study size                   | 10      | Explain how the study size was arrived at<br><b>Page 10 (“analysis” section)</b>                                                                                                                                                                                                                                                                                                                                                                                                                                                                                                                                                                                                                                                                        |
| Quantitative variables       | 11      | Explain how quantitative variables were handled in the analyses. If applicable, describe which groupings were chosen and why<br><b>Page 10 (“analysis” section)</b>                                                                                                                                                                                                                                                                                                                                                                                                                                                                                                                                                                                     |

1  
2  
3  
4  
5  
6  
7  
8  
9  
10  
11  
12  
13  
14  
15  
16  
17  
18  
19  
20  
21  
22  
23  
24  
25  
26  
27  
28  
29  
30  
31  
32  
33  
34  
35  
36  
37  
38  
39  
40  
41  
42  
43  
44  
45  
46  
47  
48  
49  
50  
51  
52  
53  
54  
55  
56  
57  
58  
59  
60

|                     |     |                                                                                                                                                                                                                                                                                                                                                                                                                                                                                                                                                                                                                             |
|---------------------|-----|-----------------------------------------------------------------------------------------------------------------------------------------------------------------------------------------------------------------------------------------------------------------------------------------------------------------------------------------------------------------------------------------------------------------------------------------------------------------------------------------------------------------------------------------------------------------------------------------------------------------------------|
| Statistical methods | 12  | <p>(a) Describe all statistical methods, including those used to control for confounding</p> <p>(b) Describe any methods used to examine subgroups and interactions</p> <p>(c) Explain how missing data were addressed</p> <p>(d) <i>Cohort study</i>—If applicable, explain how loss to follow-up was addressed<br/><i>Case-control study</i>—If applicable, explain how matching of cases and controls was addressed<br/><i>Cross-sectional study</i>—If applicable, describe analytical methods taking account of sampling strategy</p> <p>(e) Describe any sensitivity analyses</p> <p>Page 10 (“analysis” section)</p> |
| <b>Results</b>      |     |                                                                                                                                                                                                                                                                                                                                                                                                                                                                                                                                                                                                                             |
| Participants        | 13* | <p>(a) Report numbers of individuals at each stage of study—eg numbers potentially eligible, examined for eligibility, confirmed eligible, included in the study, completing follow-up, and analysed Page 10-11 (“results” section)</p> <p>(b) Give reasons for non-participation at each stage Page 10-11 (“results” section)</p> <p>(c) Consider use of a flow diagram – See figure 1</p>                                                                                                                                                                                                                                 |
| Descriptive data    | 14* | <p>(a) Give characteristics of study participants (eg demographic, clinical, social) and information on exposures and potential confounders<br/>Page 10-11 (“results” section) and table 1</p> <p>(b) Indicate number of participants with missing data for each variable of interest<br/>Not applicable (no missing data) Missing data indicated in Table 1, and mentioned in limitations section</p> <p>(c) <i>Cohort study</i>—Summarise follow-up time (eg, average and total amount)<br/>Not applicable (no patient follow-up)</p>                                                                                     |
| Outcome data        | 15* | <p><i>Cohort study</i>—Report numbers of outcome events or summary measures over time</p> <p><i>Case-control study</i>—Report numbers in each exposure category, or summary measures of exposure</p> <p><i>Cross-sectional study</i>—Report numbers of outcome events or summary measures<br/>Table 2, Figure 2 and results (page 10-12)</p>                                                                                                                                                                                                                                                                                |
| Main results        | 16  | <p>(a) Give unadjusted estimates and, if applicable, confounder-adjusted estimates and their precision (eg, 95% confidence interval). Make clear which confounders were adjusted for and why they were included</p> <p>(b) Report category boundaries when continuous variables were categorized</p> <p>(c) If relevant, consider translating estimates of relative risk into absolute risk for a meaningful time period<br/>Table 2, Figure 2 and results (page 10-12)</p>                                                                                                                                                 |
| Other analyses      | 17  | <p>Report other analyses done—eg analyses of subgroups and interactions, and sensitivity analyses</p> <p>Not applicable. No subgroup analyses performed</p>                                                                                                                                                                                                                                                                                                                                                                                                                                                                 |
| <b>Discussion</b>   |     |                                                                                                                                                                                                                                                                                                                                                                                                                                                                                                                                                                                                                             |
| Key results         | 18  | <p>Summarise key results with reference to study objectives<br/>Page 13-14</p>                                                                                                                                                                                                                                                                                                                                                                                                                                                                                                                                              |
| Limitations         | 19  | <p>Discuss limitations of the study, taking into account sources of potential bias or imprecision. Discuss both direction and magnitude of any potential bias<br/>Page 14-15</p>                                                                                                                                                                                                                                                                                                                                                                                                                                            |

|    |                          |    |
|----|--------------------------|----|
| 1  |                          |    |
| 2  |                          |    |
| 3  |                          |    |
| 4  | Interpretation           | 20 |
| 5  |                          |    |
| 6  |                          |    |
| 7  | Generalisability         | 21 |
| 8  |                          |    |
| 9  |                          |    |
| 10 | <b>Other information</b> |    |
| 11 | Funding                  | 22 |
| 12 |                          |    |
| 13 |                          |    |
| 14 |                          |    |
| 15 |                          |    |
| 16 |                          |    |
| 17 |                          |    |
| 18 |                          |    |
| 19 |                          |    |
| 20 |                          |    |
| 21 |                          |    |
| 22 |                          |    |
| 23 |                          |    |
| 24 |                          |    |
| 25 |                          |    |
| 26 |                          |    |
| 27 |                          |    |
| 28 |                          |    |
| 29 |                          |    |
| 30 |                          |    |
| 31 |                          |    |
| 32 |                          |    |
| 33 |                          |    |
| 34 |                          |    |
| 35 |                          |    |
| 36 |                          |    |
| 37 |                          |    |
| 38 |                          |    |
| 39 |                          |    |
| 40 |                          |    |
| 41 |                          |    |
| 42 |                          |    |
| 43 |                          |    |
| 44 |                          |    |
| 45 |                          |    |
| 46 |                          |    |
| 47 |                          |    |
| 48 |                          |    |
| 49 |                          |    |
| 50 |                          |    |
| 51 |                          |    |
| 52 |                          |    |
| 53 |                          |    |
| 54 |                          |    |
| 55 |                          |    |
| 56 |                          |    |
| 57 |                          |    |
| 58 |                          |    |
| 59 |                          |    |
| 60 |                          |    |

\*Give information separately for cases and controls in case-control studies and, if applicable, for exposed and unexposed groups in cohort and cross-sectional studies.

**Note:** An Explanation and Elaboration article discusses each checklist item and gives methodological background and published examples of transparent reporting. The STROBE checklist is best used in conjunction with this article (freely available on the Web sites of PLoS Medicine at <http://www.plosmedicine.org/>, Annals of Internal Medicine at <http://www.annals.org/>, and Epidemiology at <http://www.epidem.com/>). Information on the STROBE Initiative is available at [www.strobe-statement.org](http://www.strobe-statement.org).



## STROBE Statement—checklist of items that should be included in reports of observational studies

|                              | Item No | Recommendation                                                                                                                                                                                                                                                                                                                                                                                                                                                                                                                                                                                                                                                                                                                                          |
|------------------------------|---------|---------------------------------------------------------------------------------------------------------------------------------------------------------------------------------------------------------------------------------------------------------------------------------------------------------------------------------------------------------------------------------------------------------------------------------------------------------------------------------------------------------------------------------------------------------------------------------------------------------------------------------------------------------------------------------------------------------------------------------------------------------|
| <b>Title and abstract</b>    | 1       | (a) Indicate the study's design with a commonly used term in the title or the abstract<br><b>YES – see title.</b>                                                                                                                                                                                                                                                                                                                                                                                                                                                                                                                                                                                                                                       |
|                              |         | (b) Provide in the abstract an informative and balanced summary of what was done and what was found<br><b>Structured abstract provided</b>                                                                                                                                                                                                                                                                                                                                                                                                                                                                                                                                                                                                              |
| <b>Introduction</b>          |         |                                                                                                                                                                                                                                                                                                                                                                                                                                                                                                                                                                                                                                                                                                                                                         |
| Background/rationale         | 2       | Explain the scientific background and rationale for the investigation being reported<br><b>Page 7</b>                                                                                                                                                                                                                                                                                                                                                                                                                                                                                                                                                                                                                                                   |
| Objectives                   | 3       | State specific objectives, including any prespecified hypotheses<br><b>Page 8</b>                                                                                                                                                                                                                                                                                                                                                                                                                                                                                                                                                                                                                                                                       |
| <b>Methods</b>               |         |                                                                                                                                                                                                                                                                                                                                                                                                                                                                                                                                                                                                                                                                                                                                                         |
| Study design                 | 4       | Present key elements of study design early in the paper<br><b>Page 8 – (“study design” section)</b>                                                                                                                                                                                                                                                                                                                                                                                                                                                                                                                                                                                                                                                     |
| Setting                      | 5       | Describe the setting, locations, and relevant dates, including periods of recruitment, exposure, follow-up, and data collection<br><b>Page 8-9 (“study setting” section)</b>                                                                                                                                                                                                                                                                                                                                                                                                                                                                                                                                                                            |
| Participants                 | 6       | (a) <i>Cohort study</i> —Give the eligibility criteria, and the sources and methods of selection of participants. Describe methods of follow-up<br><i>Case-control study</i> —Give the eligibility criteria, and the sources and methods of case ascertainment and control selection. Give the rationale for the choice of cases and controls<br><i>Cross-sectional study</i> —Give the eligibility criteria, and the sources and methods of selection of participants<br>(b) <i>Cohort study</i> —For matched studies, give matching criteria and number of exposed and unexposed<br><i>Case-control study</i> —For matched studies, give matching criteria and the number of controls per case<br><b>Page 9 (“selection of participants” section)</b> |
| Variables                    | 7       | Clearly define all outcomes, exposures, predictors, potential confounders, and effect modifiers. Give diagnostic criteria, if applicable<br><b>Page 9-10 (“data collection” section)</b>                                                                                                                                                                                                                                                                                                                                                                                                                                                                                                                                                                |
| Data sources/<br>measurement | 8*      | For each variable of interest, give sources of data and details of methods of assessment (measurement). Describe comparability of assessment methods if there is more than one group<br><b>Page 9-10 (“data collection” section)</b>                                                                                                                                                                                                                                                                                                                                                                                                                                                                                                                    |
| Bias                         | 9       | Describe any efforts to address potential sources of bias<br><b>Page 10 (end of “data collection” section)</b>                                                                                                                                                                                                                                                                                                                                                                                                                                                                                                                                                                                                                                          |
| Study size                   | 10      | Explain how the study size was arrived at<br><b>Page 10 (“analysis” section)</b>                                                                                                                                                                                                                                                                                                                                                                                                                                                                                                                                                                                                                                                                        |
| Quantitative variables       | 11      | Explain how quantitative variables were handled in the analyses. If applicable, describe which groupings were chosen and why<br><b>Page 10 (“analysis” section)</b>                                                                                                                                                                                                                                                                                                                                                                                                                                                                                                                                                                                     |

|                     |     |                                                                                                                                                                                                                                                                                                                                                                                                                                                                                                                                                                                                                                   |
|---------------------|-----|-----------------------------------------------------------------------------------------------------------------------------------------------------------------------------------------------------------------------------------------------------------------------------------------------------------------------------------------------------------------------------------------------------------------------------------------------------------------------------------------------------------------------------------------------------------------------------------------------------------------------------------|
| Statistical methods | 12  | <p>(a) Describe all statistical methods, including those used to control for confounding</p> <p>(b) Describe any methods used to examine subgroups and interactions</p> <p>(c) Explain how missing data were addressed</p> <p>(d) <i>Cohort study</i>—If applicable, explain how loss to follow-up was addressed</p> <p><i>Case-control study</i>—If applicable, explain how matching of cases and controls was addressed</p> <p><i>Cross-sectional study</i>—If applicable, describe analytical methods taking account of sampling strategy</p> <p>(e) Describe any sensitivity analyses</p> <p>Page 10 (“analysis” section)</p> |
| <b>Results</b>      |     |                                                                                                                                                                                                                                                                                                                                                                                                                                                                                                                                                                                                                                   |
| Participants        | 13* | <p>(a) Report numbers of individuals at each stage of study—eg numbers potentially eligible, examined for eligibility, confirmed eligible, included in the study, completing follow-up, and analysed Page 10-11 (“results” section)</p> <p>(b) Give reasons for non-participation at each stage Page 10-11 (“results” section)</p> <p>(c) Consider use of a flow diagram – See figure 1</p>                                                                                                                                                                                                                                       |
| Descriptive data    | 14* | <p>(a) Give characteristics of study participants (eg demographic, clinical, social) and information on exposures and potential confounders</p> <p>Page 10-11 (“results” section) and table 1</p> <p>(b) Indicate number of participants with missing data for each variable of interest</p> <p>Missing data indicated in Table 1, and mentioned in limitations section</p> <p>(c) <i>Cohort study</i>—Summarise follow-up time (eg, average and total amount)</p> <p>Not applicable (no patient follow-up)</p>                                                                                                                   |
| Outcome data        | 15* | <p><i>Cohort study</i>—Report numbers of outcome events or summary measures over time</p> <p><i>Case-control study</i>—Report numbers in each exposure category, or summary measures of exposure</p> <p><i>Cross-sectional study</i>—Report numbers of outcome events or summary measures</p> <p>Table 2, Figure 2 and results (page 10-12)</p>                                                                                                                                                                                                                                                                                   |
| Main results        | 16  | <p>(a) Give unadjusted estimates and, if applicable, confounder-adjusted estimates and their precision (eg, 95% confidence interval). Make clear which confounders were adjusted for and why they were included</p> <p>(b) Report category boundaries when continuous variables were categorized</p> <p>(c) If relevant, consider translating estimates of relative risk into absolute risk for a meaningful time period</p> <p>Table 2, Figure 2 and results (page 10-12)</p>                                                                                                                                                    |
| Other analyses      | 17  | <p>Report other analyses done—eg analyses of subgroups and interactions, and sensitivity analyses</p> <p>Not applicable. No subgroup analyses performed</p>                                                                                                                                                                                                                                                                                                                                                                                                                                                                       |
| <b>Discussion</b>   |     |                                                                                                                                                                                                                                                                                                                                                                                                                                                                                                                                                                                                                                   |
| Key results         | 18  | <p>Summarise key results with reference to study objectives</p> <p>Page 13-14</p>                                                                                                                                                                                                                                                                                                                                                                                                                                                                                                                                                 |
| Limitations         | 19  | <p>Discuss limitations of the study, taking into account sources of potential bias or imprecision. Discuss both direction and magnitude of any potential bias</p> <p>Page 14-15</p>                                                                                                                                                                                                                                                                                                                                                                                                                                               |

1  
2  
3  
4  
5  
6  
7  
8  
9  
10  
11  
12  
13  
14  
15  
16  
17  
18  
19  
20  
21  
22  
23  
24  
25  
26  
27  
28  
29  
30  
31  
32  
33  
34  
35  
36  
37  
38  
39  
40  
41  
42  
43  
44  
45  
46  
47  
48  
49  
50  
51  
52  
53  
54  
55  
56  
57  
58  
59  
60

|                |    |                                                                                                                                                                            |
|----------------|----|----------------------------------------------------------------------------------------------------------------------------------------------------------------------------|
| Interpretation | 20 | Give a cautious overall interpretation of results considering objectives, limitations, multiplicity of analyses, results from similar studies, and other relevant evidence |
|----------------|----|----------------------------------------------------------------------------------------------------------------------------------------------------------------------------|

Page 13-15

|                  |    |                                                                       |
|------------------|----|-----------------------------------------------------------------------|
| Generalisability | 21 | Discuss the generalisability (external validity) of the study results |
|------------------|----|-----------------------------------------------------------------------|

Page 13-15

#### Other information

|         |    |                                                                                                                                                               |
|---------|----|---------------------------------------------------------------------------------------------------------------------------------------------------------------|
| Funding | 22 | Give the source of funding and the role of the funders for the present study and, if applicable, for the original study on which the present article is based |
|---------|----|---------------------------------------------------------------------------------------------------------------------------------------------------------------|

Funding disclosures provided

\*Give information separately for cases and controls in case-control studies and, if applicable, for exposed and unexposed groups in cohort and cross-sectional studies.

**Note:** An Explanation and Elaboration article discusses each checklist item and gives methodological background and published examples of transparent reporting. The STROBE checklist is best used in conjunction with this article (freely available on the Web sites of PLoS Medicine at <http://www.plosmedicine.org/>, Annals of Internal Medicine at <http://www.annals.org/>, and Epidemiology at <http://www.epidem.com/>). Information on the STROBE Initiative is available at [www.strobe-statement.org](http://www.strobe-statement.org).

# BMJ Open

## Acute paediatric asthma treatment in the pre-hospital setting: a retrospective observational study.

|                                 |                                                                                                                                                                                                                                                                                                                                                                                                                                                                                                                                                                                                                                                                                                                                                                                                                                                                                                                                                                                                                                                                                                                                 |
|---------------------------------|---------------------------------------------------------------------------------------------------------------------------------------------------------------------------------------------------------------------------------------------------------------------------------------------------------------------------------------------------------------------------------------------------------------------------------------------------------------------------------------------------------------------------------------------------------------------------------------------------------------------------------------------------------------------------------------------------------------------------------------------------------------------------------------------------------------------------------------------------------------------------------------------------------------------------------------------------------------------------------------------------------------------------------------------------------------------------------------------------------------------------------|
| Journal:                        | <i>BMJ Open</i>                                                                                                                                                                                                                                                                                                                                                                                                                                                                                                                                                                                                                                                                                                                                                                                                                                                                                                                                                                                                                                                                                                                 |
| Manuscript ID                   | bmjopen-2023-073029.R2                                                                                                                                                                                                                                                                                                                                                                                                                                                                                                                                                                                                                                                                                                                                                                                                                                                                                                                                                                                                                                                                                                          |
| Article Type:                   | Original research                                                                                                                                                                                                                                                                                                                                                                                                                                                                                                                                                                                                                                                                                                                                                                                                                                                                                                                                                                                                                                                                                                               |
| Date Submitted by the Author:   | 25-May-2023                                                                                                                                                                                                                                                                                                                                                                                                                                                                                                                                                                                                                                                                                                                                                                                                                                                                                                                                                                                                                                                                                                                     |
| Complete List of Authors:       | Craig, Simon; Monash Medical Centre Clayton, Paediatric Emergency Department; Monash University Department of Paediatrics<br>Delardes, Belinda; Ambulance Victoria; Monash University Department of Paramedicine<br>Nehme, Ziad; Ambulance Victoria, Research & Evaluation; Monash University School of Public Health and Preventive Medicine<br>Wilson, Catherine; Murdoch Childrens Research Institute, Emergency Medicine Research Group; PREDICT, Research Group<br>Dalziel, Stuart; Starship Children's Health, Emergency Department; The University of Auckland Faculty of Medical and Health Sciences, Paediatrics and Surgery<br>Nixon, Gillian; Monash University Department of Paediatrics; Monash Children's Hospital, Respiratory Medicine<br>Powell, Colin; Sidra Medical and Research Center, Department of Emergency Medicine; Cardiff School of Health Sciences<br>Graudins, Andis; Monash Health, Dandenong Emergency Department; Monash University<br>Babl, Franz; Royal Childrens Hospital, Emergency Department; The University of Melbourne Faculty of Medicine Dentistry and Health Sciences, Paediatrics |
| <b>Primary Subject Heading</b>: | Paediatrics                                                                                                                                                                                                                                                                                                                                                                                                                                                                                                                                                                                                                                                                                                                                                                                                                                                                                                                                                                                                                                                                                                                     |
| Secondary Subject Heading:      | Emergency medicine                                                                                                                                                                                                                                                                                                                                                                                                                                                                                                                                                                                                                                                                                                                                                                                                                                                                                                                                                                                                                                                                                                              |
| Keywords:                       | Asthma < THORACIC MEDICINE, ACCIDENT & EMERGENCY MEDICINE, Paediatric A&E and ambulatory care < PAEDIATRICS                                                                                                                                                                                                                                                                                                                                                                                                                                                                                                                                                                                                                                                                                                                                                                                                                                                                                                                                                                                                                     |
|                                 |                                                                                                                                                                                                                                                                                                                                                                                                                                                                                                                                                                                                                                                                                                                                                                                                                                                                                                                                                                                                                                                                                                                                 |

SCHOLARONE™  
Manuscripts

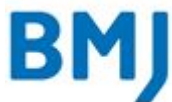

I, the Submitting Author has the right to grant and does grant on behalf of all authors of the Work (as defined in the below author licence), an exclusive licence and/or a non-exclusive licence for contributions from authors who are: i) UK Crown employees; ii) where BMJ has agreed a CC-BY licence shall apply, and/or iii) in accordance with the terms applicable for US Federal Government officers or employees acting as part of their official duties; on a worldwide, perpetual, irrevocable, royalty-free basis to BMJ Publishing Group Ltd ("BMJ") its licensees and where the relevant Journal is co-owned by BMJ to the co-owners of the Journal, to publish the Work in this journal and any other BMJ products and to exploit all rights, as set out in our [licence](#).

The Submitting Author accepts and understands that any supply made under these terms is made by BMJ to the Submitting Author unless you are acting as an employee on behalf of your employer or a postgraduate student of an affiliated institution which is paying any applicable article publishing charge ("APC") for Open Access articles. Where the Submitting Author wishes to make the Work available on an Open Access basis (and intends to pay the relevant APC), the terms of reuse of such Open Access shall be governed by a Creative Commons licence – details of these licences and which [Creative Commons](#) licence will apply to this Work are set out in our licence referred to above.

Other than as permitted in any relevant BMJ Author's Self Archiving Policies, I confirm this Work has not been accepted for publication elsewhere, is not being considered for publication elsewhere and does not duplicate material already published. I confirm all authors consent to publication of this Work and authorise the granting of this licence.

1  
2  
3 **Acute paediatric asthma treatment in the pre-hospital setting: a retrospective**  
4 **observational study.**  
5  
6  
7  
8  
9

10 **Simon Craig**<sup>1,2,3</sup> MBBS FACEM MPH MHPE, **Belinda Delardes**<sup>4,5</sup> B Paramedic (Hons), **Ziad**  
11 **Nehme**<sup>4,5,6</sup> PhD, **Catherine L Wilson**<sup>3</sup> Dip App Sci Nurs MPH Ms Evaluation and Assessment,  
12 **Stuart R Dalziel**<sup>7,8</sup> MBChB FRACP PhD, **Gillian M Nixon**<sup>1,9</sup> MBChB MD FRACP, **Colin VE**  
13 **Powell**<sup>10,11</sup> MBChB DCH MRCP(UK) FRACP FRCPC MD, **Andis Gaudins**<sup>12,13,14</sup> MBBS PhD  
14 FACEM FACMT, **Franz E Babi**<sup>3,15,16,17</sup> MD MPH DMedSc FRACP FAAP FACEP on behalf of the  
15 PREDICT Network.  
16  
17  
18  
19  
20  
21  
22  
23  
24  
25  
26  
27  
28  
29

30 **Affiliations**  
31

- 32 1. Department of Paediatrics, School of Clinical Sciences at Monash Health, Monash  
33 University, Victoria, Australia.
- 34 2. Monash Emergency Program, Paediatric Emergency Department, Monash Medical  
35 Centre, Monash Health, Victoria, Australia.
- 36 3. Emergency Research, Clinical Sciences, Murdoch Children's Research Institute,  
37 Victoria, Australia
- 38 4. Ambulance Victoria, Blackburn North, Victoria, Australia
- 39 5. Department of Paramedicine, Monash University, Frankston, Victoria, Australia
- 40 6. School of Public Health and Preventive Medicine, Monash University, Melbourne,  
41 Victoria, Australia
- 42 7. Departments of Surgery and Paediatrics: Child and Youth Health, The University of  
43 Auckland, New Zealand.
- 44  
45  
46  
47  
48  
49  
50  
51  
52  
53  
54  
55  
56  
57  
58  
59  
60

- 1
  - 2
  - 3
  - 4
  - 5
  - 6
  - 7
  - 8
  - 9
  - 10
  - 11
  - 12
  - 13
  - 14
  - 15
  - 16
  - 17
  - 18
  - 19
  - 20
  - 21
  - 22
  - 23
  - 24
  - 25
  - 26
  - 27
  - 28
  - 29
  - 30
  - 31
  - 32
  - 33
  - 34
  - 35
  - 36
  - 37
  - 38
  - 39
  - 40
  - 41
  - 42
  - 43
  - 44
  - 45
  - 46
  - 47
  - 48
  - 49
  - 50
  - 51
  - 52
  - 53
  - 54
  - 55
  - 56
  - 57
  - 58
  - 59
  - 60
8. Children's Emergency Department, Starship Children's Hospital, Auckland, New Zealand
9. Department of Respiratory Medicine, Monash Children's Hospital, Melbourne, Victoria, Australia.
10. Division of Population Medicine, School of Medicine, Cardiff, United Kingdom.
11. Emergency Medicine, Sidra Medicine, Doha Qatar
12. Department of Medicine, School of Clinical Sciences at Monash Health, Monash University, Victoria, Australia.
13. Monash Emergency Program, Monash Health, Dandenong Hospital, Victoria, Australia.
14. Monash Health Clinical Toxicology and Addiction Medicine Service, Monash Health, Dandenong Hospital, Victoria, Australia.
15. Department of Emergency Medicine, The Royal Children's Hospital, Victoria, Australia.
16. Department of Paediatrics, Faculty of Medicine, Dentistry and Health Sciences, University of Melbourne, Victoria, Australia.
17. Department of Critical Care, Faculty of Medicine, Dentistry and Health Sciences, University of Melbourne, Victoria, Australia.

Abstract 238 words (max 300)

Main text 2398 words (max 3000)

27 references (max 30)

2 tables, 2 figures, 1 box (up to 6 total). One supplementary online table.

1  
2  
3  
4  
5  
6  
7  
8  
9  
10 Corresponding author  
11  
12

13 Prof Simon Craig  
14

- 15 - Paediatric Emergency Department, Monash Medical Centre, Monash Health, Clayton,  
16  
17 Victoria, Australia  
18
- 19 - Department of Paediatrics, Monash University, Clayton, Victoria, Australia  
20  
21

22 [Simon.Craig@monash.edu](mailto:Simon.Craig@monash.edu)  
23  
24  
25  
26  
27  
28  
29  
30  
31  
32  
33  
34  
35  
36  
37  
38  
39  
40  
41  
42  
43  
44  
45  
46  
47  
48  
49  
50  
51  
52  
53  
54  
55  
56  
57  
58  
59  
60



1  
2  
3 **Objectives:** To describe the incidence of and patterns of “escalated care” (care in addition to  
4 standard treatment with systemic corticosteroids and inhaled bronchodilators) for children  
5 receiving pre-hospital treatment for asthma.  
6  
7  
8  
9

10  
11  
12  
13 **Design:** Retrospective observational study  
14  
15  
16

17  
18 **Setting:** State-wide ambulance service data (Ambulance Victoria in Victoria, Australia,  
19 population 6.5 million)  
20  
21  
22

23  
24  
25 **Participants:** Children aged 1-17 years and given a final diagnosis of asthma by the treating  
26 paramedics and/or treated with inhaled bronchodilators from 1 July 2019 to 30 June 2020.  
27  
28  
29

30  
31  
32 **Primary and secondary outcome measures:** We classified “escalation of care” as parenteral  
33 administration of adrenaline, or provision of respiratory support. We compared clinical,  
34 demographic and treatments administered between those receiving and not receiving  
35 escalation of care.  
36  
37  
38  
39  
40  
41  
42  
43  
44

45 **Results:** Paramedics attended 1,572 children with acute exacerbations of asthma during the  
46 1-year study period. Of these, 22 (1.4%) had escalated care, all receiving parenteral  
47 adrenaline. Patients with escalated care were more likely to be older, had previously required  
48 hospital admission for asthma and had severe respiratory distress at initial assessment.  
49  
50  
51  
52  
53  
54  
55  
56  
57  
58  
59  
60  
61  
62  
63  
64  
65  
66  
67  
68  
69  
70  
71  
72  
73  
74  
75  
76  
77  
78  
79  
80  
81  
82  
83  
84  
85  
86  
87  
88  
89  
90  
91  
92  
93  
94  
95  
96  
97  
98  
99  
100  
101  
102  
103  
104  
105  
106  
107  
108  
109  
110  
111  
112  
113  
114  
115  
116  
117  
118  
119  
120  
121  
122  
123  
124  
125  
126  
127  
128  
129  
130  
131  
132  
133  
134  
135  
136  
137  
138  
139  
140  
141  
142  
143  
144  
145  
146  
147  
148  
149  
150  
151  
152  
153  
154  
155  
156  
157  
158  
159  
160  
161  
162  
163  
164  
165  
166  
167  
168  
169  
170  
171  
172  
173  
174  
175  
176  
177  
178  
179  
180  
181  
182  
183  
184  
185  
186  
187  
188  
189  
190  
191  
192  
193  
194  
195  
196  
197  
198  
199  
200  
201  
202  
203  
204  
205  
206  
207  
208  
209  
210  
211  
212  
213  
214  
215  
216  
217  
218  
219  
220  
221  
222  
223  
224  
225  
226  
227  
228  
229  
230  
231  
232  
233  
234  
235  
236  
237  
238  
239  
240  
241  
242  
243  
244  
245  
246  
247  
248  
249  
250  
251  
252  
253  
254  
255  
256  
257  
258  
259  
260  
261  
262  
263  
264  
265  
266  
267  
268  
269  
270  
271  
272  
273  
274  
275  
276  
277  
278  
279  
280  
281  
282  
283  
284  
285  
286  
287  
288  
289  
290  
291  
292  
293  
294  
295  
296  
297  
298  
299  
300  
301  
302  
303  
304  
305  
306  
307  
308  
309  
310  
311  
312  
313  
314  
315  
316  
317  
318  
319  
320  
321  
322  
323  
324  
325  
326  
327  
328  
329  
330  
331  
332  
333  
334  
335  
336  
337  
338  
339  
340  
341  
342  
343  
344  
345  
346  
347  
348  
349  
350  
351  
352  
353  
354  
355  
356  
357  
358  
359  
360  
361  
362  
363  
364  
365  
366  
367  
368  
369  
370  
371  
372  
373  
374  
375  
376  
377  
378  
379  
380  
381  
382  
383  
384  
385  
386  
387  
388  
389  
390  
391  
392  
393  
394  
395  
396  
397  
398  
399  
400  
401  
402  
403  
404  
405  
406  
407  
408  
409  
410  
411  
412  
413  
414  
415  
416  
417  
418  
419  
420  
421  
422  
423  
424  
425  
426  
427  
428  
429  
430  
431  
432  
433  
434  
435  
436  
437  
438  
439  
440  
441  
442  
443  
444  
445  
446  
447  
448  
449  
450  
451  
452  
453  
454  
455  
456  
457  
458  
459  
460  
461  
462  
463  
464  
465  
466  
467  
468  
469  
470  
471  
472  
473  
474  
475  
476  
477  
478  
479  
480  
481  
482  
483  
484  
485  
486  
487  
488  
489  
490  
491  
492  
493  
494  
495  
496  
497  
498  
499  
500  
501  
502  
503  
504  
505  
506  
507  
508  
509  
510  
511  
512  
513  
514  
515  
516  
517  
518  
519  
520  
521  
522  
523  
524  
525  
526  
527  
528  
529  
530  
531  
532  
533  
534  
535  
536  
537  
538  
539  
540  
541  
542  
543  
544  
545  
546  
547  
548  
549  
550  
551  
552  
553  
554  
555  
556  
557  
558  
559  
560  
561  
562  
563  
564  
565  
566  
567  
568  
569  
570  
571  
572  
573  
574  
575  
576  
577  
578  
579  
580  
581  
582  
583  
584  
585  
586  
587  
588  
589  
590  
591  
592  
593  
594  
595  
596  
597  
598  
599  
600  
601  
602  
603  
604  
605  
606  
607  
608  
609  
610  
611  
612  
613  
614  
615  
616  
617  
618  
619  
620  
621  
622  
623  
624  
625  
626  
627  
628  
629  
630  
631  
632  
633  
634  
635  
636  
637  
638  
639  
640  
641  
642  
643  
644  
645  
646  
647  
648  
649  
650  
651  
652  
653  
654  
655  
656  
657  
658  
659  
660  
661  
662  
663  
664  
665  
666  
667  
668  
669  
670  
671  
672  
673  
674  
675  
676  
677  
678  
679  
680  
681  
682  
683  
684  
685  
686  
687  
688  
689  
690  
691  
692  
693  
694  
695  
696  
697  
698  
699  
700  
701  
702  
703  
704  
705  
706  
707  
708  
709  
710  
711  
712  
713  
714  
715  
716  
717  
718  
719  
720  
721  
722  
723  
724  
725  
726  
727  
728  
729  
730  
731  
732  
733  
734  
735  
736  
737  
738  
739  
740  
741  
742  
743  
744  
745  
746  
747  
748  
749  
750  
751  
752  
753  
754  
755  
756  
757  
758  
759  
760  
761  
762  
763  
764  
765  
766  
767  
768  
769  
770  
771  
772  
773  
774  
775  
776  
777  
778  
779  
780  
781  
782  
783  
784  
785  
786  
787  
788  
789  
790  
791  
792  
793  
794  
795  
796  
797  
798  
799  
800  
801  
802  
803  
804  
805  
806  
807  
808  
809  
810  
811  
812  
813  
814  
815  
816  
817  
818  
819  
820  
821  
822  
823  
824  
825  
826  
827  
828  
829  
830  
831  
832  
833  
834  
835  
836  
837  
838  
839  
840  
841  
842  
843  
844  
845  
846  
847  
848  
849  
850  
851  
852  
853  
854  
855  
856  
857  
858  
859  
860  
861  
862  
863  
864  
865  
866  
867  
868  
869  
870  
871  
872  
873  
874  
875  
876  
877  
878  
879  
880  
881  
882  
883  
884  
885  
886  
887  
888  
889  
890  
891  
892  
893  
894  
895  
896  
897  
898  
899  
900  
901  
902  
903  
904  
905  
906  
907  
908  
909  
910  
911  
912  
913  
914  
915  
916  
917  
918  
919  
920  
921  
922  
923  
924  
925  
926  
927  
928  
929  
930  
931  
932  
933  
934  
935  
936  
937  
938  
939  
940  
941  
942  
943  
944  
945  
946  
947  
948  
949  
950  
951  
952  
953  
954  
955  
956  
957  
958  
959  
960  
961  
962  
963  
964  
965  
966  
967  
968  
969  
970  
971  
972  
973  
974  
975  
976  
977  
978  
979  
980  
981  
982  
983  
984  
985  
986  
987  
988  
989  
990  
991  
992  
993  
994  
995  
996  
997  
998  
999  
1000

Of 1307 children with respiratory status data available, at arrival to hospital the respiratory status of children had improved overall (normal/mild respiratory distress at initial assessment 847 (64.8%), normal/mild respiratory distress at hospital arrival 1142 (87.4%),  $p < 0.0001$ ).

1  
2  
3  
4  
5  
6 **Conclusions:** Most children with acute exacerbations of asthma did not receive escalated  
7  
8 therapy during their pre-hospital treatment from ambulance paramedics. Most patients were  
9  
10 treated with inhaled bronchodilators only and clinically improved by the time they arrived in  
11  
12 hospital.  
13  
14  
15  
16  
17  
18  
19  
20  
21  
22

### 23 **Strengths and limitations of this study**

- 24 - Highly generalisable, with the use of a comprehensive electronic state-wide  
25 ambulance database.  
26
- 27 - Most ambulance cases were concentrated in metropolitan regions; this may limit  
28 generalisability to rural and regional settings.  
29
- 30 - Bias was minimised by direct download from electronic medical record, rather than  
31 abstraction by reviewers.  
32
- 33 - It is possible that a small number of critically ill cases were misclassified due to an  
34 ambulance diagnosis other than asthma.  
35  
36  
37  
38  
39  
40  
41  
42  
43  
44  
45  
46  
47  
48  
49  
50  
51  
52  
53  
54  
55  
56  
57  
58  
59  
60

## **Introduction**

Asthma is a frequent reason for children to attend the emergency department (ED),<sup>1,2</sup> and one of the most common reasons for paediatric hospitalization after an ED visit.<sup>3</sup> In the USA, the rate of paediatric ED visits for asthma increased by 13.3% between 2001 and 2010,<sup>4</sup> while in the United Kingdom, it is estimated that a child is admitted to hospital with an asthma attack every 20 minutes.<sup>5</sup>

Most children with asthma have mild or moderate exacerbations, and respond to first-line treatment with inhaled bronchodilator therapy and systemic steroids.<sup>6-9</sup> However, some children with severe asthma require more intensive therapies including intravenous (IV) medications, endotracheal intubation and/or admission to intensive care.<sup>9-11</sup> Management of acute severe asthma is complicated by a number of problems, including a large number of treatment options, wide variation in self-reported and actual physician practice,<sup>12-15</sup> and a weak evidence base.<sup>16,17</sup>

Early initiation of therapy in the pre-hospital setting may abort an asthma attack and prevent further escalation on arrival to the ED. This in turn may prevent the need for more invasive treatment and potential complications or side effects of medications used in escalation. The introduction of a new treatment protocol emphasizing early use of systemic corticosteroids in a large Emergency Medical Services system was associated with reduced rates of hospitalization, less need for critical care and shortened hospital length of stay.<sup>18</sup> Systemic corticosteroid administration has been the subject of successful improvement projects in the pre-hospital setting.<sup>19</sup> However, a separate study identified high rates of paramedic non-compliance with pre-hospital treatment protocols recommending parenteral adrenaline for children with high-severity respiratory distress.<sup>20</sup>

1  
2  
3 There are little data available on treatment patterns or pre-hospital outcomes for children  
4 with acute asthma in the Australian setting. This study aimed to extract information from the  
5 electronic medical records of Ambulance Victoria (AV), Australia, on all children treated for  
6 asthma to understand the incidence of and patterns of “escalated” care (care in addition to  
7 standard treatment with systemic corticosteroids and inhaled bronchodilators).  
8  
9  
10  
11  
12  
13  
14  
15  
16  
17

## 18 **Methods**

### 19 ***Study design***

20 This was a retrospective cohort study of all children who were either given a final diagnosis  
21 of asthma by the treating AV paramedics or treated with inhaled bronchodilators from 1 July  
22 2019 to 30 June 2020. The project is reported according to the Strengthening the Reporting  
23 of Observational Studies in Epidemiology (STROBE) statement.<sup>21</sup> The study was approved by  
24 the Royal Children’s Hospital Research Ethics and Governance Office, Melbourne, Australia  
25 (60707) and the Ambulance Victoria Research Governance Committee, Melbourne, Australia.  
26  
27  
28  
29  
30  
31  
32  
33  
34  
35  
36  
37  
38  
39

### 40 ***Study setting***

41 AV is the single public emergency medical service for the state of Victoria, Australia  
42 (population of 6.5 million over 227,000 square kilometres).  
43  
44

45 AV clinical practice guidelines<sup>22</sup> provide recommendations for asthma management according  
46 to severity (Box 1), which include: inhaled salbutamol via a pressurised metered dose inhaler  
47 (pMDI) as initial treatment for mild / moderate asthma; nebulised salbutamol and  
48 ipratropium reserved for severe or critical illness, or failure of moderate asthma to respond  
49 to treatment after 20 minutes; corticosteroids (intravenous or oral dexamethasone) for  
50 critical asthma in children and for severe and critical asthma in adults; parenteral adrenaline  
51  
52  
53  
54  
55  
56  
57  
58  
59  
60

1  
2  
3 (intramuscular, intravenous infusion or titrated boluses) for critical asthma; and assisted  
4  
5 ventilation and/or intubation for unconsciousness or respiratory arrest. Children aged 12  
6  
7 years or more are managed according to an “adult” algorithm, which has a lower threshold  
8  
9 for corticosteroids compared to the paediatric algorithm (recommended for all severe cases,  
10  
11 rather than only in critical illness) .<sup>22</sup>  
12  
13  
14  
15  
16  
17

### 18 ***Selection of participants.***

19  
20 We searched the AV electronic patient care system for presentations of children aged more  
21  
22 than one year and less than 18 years matching the following criteria: final primary assessment  
23  
24 of asthma or cough or shortness of breath. We excluded children with a paramedic diagnosis  
25  
26 of cough or shortness of breath if they were not administered any inhaled bronchodilator  
27  
28 (salbutamol or ipratropium). Records of cases assessed by multiple ambulance teams during  
29  
30 the same incident were unified as a single paramedic attendance. Interhospital transports  
31  
32 and patients managed for cardiac arrest were excluded.  
33  
34  
35  
36  
37  
38  
39

### 40 ***Data collection***

41  
42 Data were extracted directly from the AV medical record database into a purpose-designed  
43  
44 spreadsheet and analysed. Exact medication doses were not extracted, as treatment is highly  
45  
46 protocolised (Box 1).  
47  
48

49 We defined “respiratory support” as the use of continuous positive airway pressure (CPAP),  
50  
51 bi-level positive airway pressure (BiPAP), assisted ventilation, intubation and mechanical  
52  
53 ventilation, or application of a bag-valve-mask device.  
54  
55

56 We defined “escalation” of care as parenteral administration of adrenaline, or provision of  
57  
58 respiratory support. Although AV protocols recommend oral (or parenteral) corticosteroids  
59  
60

1  
2  
3 for severe and critical asthma, corticosteroids are usually considered part of routine asthma  
4 care (rather than reserved for critical illness). We did not include nebulised adrenaline for  
5 suspected croup / upper airway obstruction. The case notes were reviewed and verified by a  
6 second paramedic abstractor (BD) for all patients where escalation was identified through  
7 electronic medical record data.  
8  
9  
10  
11  
12  
13  
14  
15  
16  
17

### 18 ***Analysis***

19  
20 Descriptive statistics were used to summarise patient characteristics, clinical features and  
21 treatments administered. Non-parametric data is reported using median and interquartile  
22 range (IQR), while categorical data is presented as count and percentage. We did not impute  
23 any missing data.  
24  
25  
26  
27  
28

29  
30 Comparisons were made between those requiring escalation of care to those not requiring  
31 escalation of care. Categorical data is compared using Chi-square test or Fisher's exact test as  
32 appropriate. Non-parametric data is compared using Mann-Whitney U test.  
33  
34  
35  
36

37 All analyses were performed using SPSS for Windows (IBM Corp. Released 2021. IBM SPSS  
38 Statistics for Windows, Version 28.0. Armonk, NY: IBM Corp.).  
39  
40  
41  
42  
43  
44

### 45 ***Patient and public involvement***

46  
47 Patients were not involved in the design of this study.  
48  
49  
50  
51

### 52 **Results**

53  
54 Over the study period, the service responded to 633,950 on-road emergency cases,<sup>23</sup> mainly  
55 using advanced life support (ALS) or mobile intensive care ambulance (MICA) paramedics. We  
56 identified 3,587 children who had been assessed by AV with a primary assessment diagnosis  
57  
58  
59  
60

1  
2  
3 of asthma, cough, or shortness of breath, 1,520 were excluded, leaving 1,572 children  
4 managed by AV with asthma (figure 1).  
5  
6

7  
8 The median age of the cohort was 6 years (IQR 4-10 years) and 888 (56.5%) were male. Most  
9  
10 (87.6%) patients had a documented past history of asthma, 115 (7.3%) had been hospitalised,  
11  
12 63 (4%) had required intensive care admission, and 19 (1.2%) had been intubated for a  
13  
14 previous asthma exacerbation. Information on usual asthma medications was not available.  
15  
16 The median initial respiratory rate was 32 breaths/minute (IQR 24 – 40 breaths/minute). Of  
17  
18 the 1,460 patients who had initial work of breathing documented, 978 (67.0%) had normal or  
19  
20 mild work of breathing, and 166 (7.7%) had severe work of breathing.  
21  
22  
23

24  
25 Ambulance response time was a median of 11.9 minutes (IQR 8.2 to 15.2 minutes);  
26  
27 paramedics were on the scene with the patient for a median of 17 minutes (IQR 12.7 to 25.1  
28  
29 minutes). Patients were transported by ambulance in 90% (n=1419) of attendances.  
30  
31

32  
33 Paramedics administered inhaled bronchodilators in 946 (60.2%) of cases. Of those, 493  
34  
35 (52.1%) received salbutamol alone, 13 (1.4%) received ipratropium alone, and 440 (46.5%)  
36  
37 received salbutamol and ipratropium. For those receiving bronchodilators, a median (IQR) of  
38  
39 1 (1-2) administrations were recorded. Oxygen administration was documented in 306  
40  
41 (19.4%) patients, most commonly by nebuliser mask, nasal cannulae, or an oxygen mask;  
42  
43 however, 514 (32.6%) received nebulised medication, driven by oxygen. Oral corticosteroids  
44  
45 were administered to 141 (9.0%) patients.  
46  
47  
48

49  
50 Twenty-six records were reviewed for escalation of care; in four patients the electronic record  
51  
52 was incorrectly coded, due to inadvertent selection of intravenous salbutamol (used by AV  
53  
54 for pre-term labour) instead of nebulised salbutamol, leaving 22 (1.4%) patients with  
55  
56 escalated care (figure 1). Patients with escalated care were more likely to be older, had  
57  
58 previously required hospital admission for asthma and had severe respiratory distress at  
59  
60

1  
2  
3 initial assessment (Table 1). Those receiving escalated care were more likely to be treated  
4  
5 with inhaled bronchodilators, corticosteroids and oxygen (Table 2). With increasing severity  
6  
7 of illness, children were more likely to be administered nebulised salbutamol, less likely to be  
8  
9 administered salbutamol by a pMDI, more likely to receive ipratropium and more likely to  
10  
11 receive systemic corticosteroids (Supplementary Online Table).  
12  
13

14  
15 All patients who received escalated care received parenteral adrenaline. No patients received  
16  
17 non-invasive ventilation, assisted ventilation or intubation. Four children (aged two, fourteen,  
18  
19 sixteen and seventeen years) received an adrenaline infusion. One patient who received IM  
20  
21 adrenaline also had a bag-valve-mask applied, however, did not receive positive pressure  
22  
23 ventilation. They were a two-year-old child who had difficulty breathing and cough that was  
24  
25 not improving with salbutamol administered at home. They became unresponsive after a  
26  
27 coughing episode and bystander cardiopulmonary resuscitation was initiated. They were  
28  
29 breathing spontaneously and responsive upon initial paramedic assessment.  
30  
31  
32  
33

34  
35 Reports of respiratory status at initial assessment and hospital arrival were available for 1307  
36  
37 (85.5%) of the cohort. On arrival to hospital the respiratory status of children had improved  
38  
39 overall (normal/mild respiratory distress at initial assessment 847 (64.8%), normal/mild  
40  
41 respiratory distress at hospital arrival 1142 (87.4%),  $p < 0.0001$ ). One hundred and thirty-one  
42  
43 (81.2%) of the 160 children with severe respiratory distress at initial assessment had  
44  
45 improved. Of the 847 children with normal/mild respiratory distress at initial assessment, only  
46  
47 24 (2.8%) were documented as having moderate or severe respiratory distress at hospital  
48  
49 arrival; and only 9 (0.8%) of the 1146 children with normal/mild/moderate respiratory  
50  
51 distress at initial assessment were documented as having severe respiratory distress at  
52  
53 hospital arrival (Figure 2).  
54  
55  
56  
57  
58  
59  
60



## **Discussion.**

This study provides a population-based state-wide assessment of pre-hospital asthma management in children. Most children with acute exacerbations of asthma in Victoria, Australia, did not receive escalated therapy during their pre-hospital treatment from ambulance paramedics. Although more than 60% had either mild or no respiratory distress, over 90% of all patients were transported to hospital. Overall, the respiratory status of children improved from ambulance arrival to hospital arrival in all severity categories.

The overall rate of parenteral bronchodilator (adrenaline) administration was 1.6%. No patients received non-invasive ventilation, assisted ventilation or intubation, and most patients were treated with inhaled bronchodilators and clinically improved by the time they arrived in hospital. Those receiving escalated care were older, were more likely to have a history of asthma requiring hospital admission and/or intubation and have severe respiratory distress on ambulance arrival.

A recent large study described in-hospital management of acute asthma exacerbations in Australia and New Zealand. In 14,029 children, there was a higher overall rates of escalated therapy (7.3% overall, with 4.2% receiving parenteral bronchodilators and 4.3% respiratory support).<sup>24</sup> A common indication for escalation of care is failure to adequately respond to first-line therapy. The relatively low rates of treatment escalation in the pre-hospital setting (1.6%) suggests that a small proportion of children are seriously ill, while most are early in their treatment, and may not have had sufficient time to demonstrate improvement (or lack of improvement) prior to hospital arrival.

There is little evidence to guide escalated therapy for asthma. A recent Overview of Cochrane reviews of clinical trials on escalated therapy for asthma<sup>16</sup> assessed the evidence for parenteral bronchodilators, Heliox, respiratory support and inhaled magnesium. The review

1  
2  
3 found that the majority of comparisons involved between one and three trials and fewer than  
4  
5 100 participants, making it difficult to assess the balance between benefits and potential  
6  
7 harms. The authors were unable to make firm practice recommendations.<sup>16</sup>  
8  
9

10 There is little evidence to support intramuscular adrenaline as first-line treatment for  
11  
12 seriously ill children with asthma,<sup>25</sup> although it has a number of advantages, including ease of  
13  
14 administration and paramedic familiarity. Parenteral adrenaline is also used for anaphylaxis,  
15  
16 cardiac arrest, and management of hypotension, while nebulised adrenaline is used for severe  
17  
18 upper airway obstruction in croup. In addition, it can be easily and rapidly administered as  
19  
20 there is no need for dilution prior to administration, and no requirement for a prolonged  
21  
22 infusion.<sup>22</sup>  
23  
24  
25  
26

27 Pre-hospital treatment of asthma rarely results in escalation of therapy beyond inhaled  
28  
29 bronchodilators and systemic corticosteroids. In addition, the use of parenteral  
30  
31 bronchodilators is often reserved for those who do not improve after initial inhaled  
32  
33 bronchodilators, and is administered relatively late in the course of an ED visit.<sup>15</sup> Given that  
34  
35 most children with asthma will improve with pre-hospital treatment, and/or will not have  
36  
37 sufficient time to “fail to improve” with standard therapy, it appears that any comparative  
38  
39 clinical trials to determine the superiority of one parenteral bronchodilator over another  
40  
41 should be reserved for the in-hospital rather than pre-hospital setting.  
42  
43  
44  
45  
46  
47  
48  
49

### 50 **Limitations**

51  
52 Inclusion in the study was based on a combination of paramedic diagnosis of asthma and  
53  
54 administration of inhaled bronchodilators. While only 89% had a diagnosis of asthma  
55  
56 recorded in the ambulance notes, it seems that the cohort is reflective of the asthma  
57  
58 population as over 87% of cases had a previous diagnosis of asthma.  
59  
60

1  
2  
3 Due to state-wide data collection and large numbers of patients, our study is likely to be  
4 generalisable to other settings with similar pre-hospital care systems. However, most  
5  
6 ambulance cases within Victoria are concentrated in the metropolitan area of Melbourne (the  
7  
8 capital city), which may limit generalisability to rural and regional settings. Approximately 10%  
9  
10 of children were not transported to hospital; this is similar to the rate identified in a study of  
11  
12 children with seizures from the same ambulance service.<sup>26</sup>  
13  
14  
15  
16

17  
18 This study is a retrospective review of a comprehensive electronic database. We optimised  
19  
20 data extraction and minimised bias through the collection of variables using a piloted data  
21  
22 collection instrument, and application of pre-defined inclusion and exclusion criteria.<sup>27,28</sup> Due  
23  
24 to the nature of record-keeping within the ambulance service (all cases are documented using  
25  
26 the electronic system), it is unlikely that any cases of escalated care were missed. As we  
27  
28 downloaded fields directly from the electronic medical record system, we did not  
29  
30 independently abstract any variables. However, we verified all instances of documented  
31  
32 escalation of care through consultation with a second (paramedic) reviewer and identified  
33  
34 four cases of misclassification. It is possible that we missed some children who were not  
35  
36 classified as asthma, were critically ill, not given inhaled bronchodilators and only given  
37  
38 parenteral adrenaline. However, this is likely to be a very small number of cases. There was  
39  
40 some missing data on final observations on arrival to hospital, however, this was not a primary  
41  
42 objective of our study.  
43  
44  
45  
46  
47  
48  
49  
50  
51

## 52 **Conclusions**

53  
54 Most children with acute exacerbations of asthma did not receive escalated therapy during  
55  
56 their pre-hospital treatment from ambulance paramedics. Most patients were treated with  
57  
58 inhaled bronchodilators only and clinically improved by the time they arrived in hospital. Due  
59  
60

1  
2  
3 to the very low incidence of treatment escalation or clinical deterioration, any comparative  
4  
5 clinical trials to determine the superiority of one parenteral bronchodilator over another  
6  
7  
8 should be reserved for the in-hospital rather than pre-hospital setting.  
9  
10  
11  
12  
13  
14

### 15 **Funding**

16  
17  
18 This work is supported by the NHMRC Centre of Research Excellence in Paediatric Emergency  
19  
20 Medicine (GNT1171228), Canberra, Australia. SC's contribution was funded by the Thoracic  
21  
22 Society of Australia and New Zealand and National Asthma Council Fellowship, 2020 and the  
23  
24 Australasian College for Emergency Medicine Foundation Al Spilman Early Career Research  
25  
26 Grant 2017. SRDs time was in part funded by Cure Kids New Zealand. FEB's time was funded  
27  
28 by an NHMRC Investigator Leadership grant and the Royal Children's Hospital Foundation,  
29  
30 Parkville, Australia.  
31  
32  
33  
34  
35  
36  
37  
38  
39  
40  
41  
42  
43  
44  
45  
46

47 Figure 1. Flow chart – pre-hospital management of acute asthma in children.  
48  
49  
50  
51  
52  
53  
54  
55  
56  
57  
58  
59  
60

1  
2  
3  
4  
5  
6  
7  
8  
9  
10  
11  
12  
13  
14  
15  
16  
17  
18  
19  
20  
21  
22  
23  
24  
25  
26  
27  
28  
29  
30  
31  
32  
33  
34  
35  
36  
37  
38  
39  
40  
41  
42  
43  
44  
45  
46  
47  
48  
49  
50  
51  
52  
53  
54  
55  
56  
57  
58  
59  
60

AV, Ambulance Victoria.

For peer review only

1  
2  
3  
4  
5  
6  
7  
8 **Box 1.** Asthma severity assessment and treatment according to Ambulance Victoria Clinical  
9 Practice Guidelines  
10

11  
12 **Mild / Moderate:** normal conscious state, some increased work of breathing, tachycardia,  
13 speaking in phrases / sentences  
14

- 15 - Salbutamol pMDI and spacer:  
16     ○ 6 or more years: 4-12 doses  
17     ○ 2-5 years: 2-6 doses  
18  
19

20  
21 **Severe:** agitated / distressed, markedly increased work of breathing, including accessory  
22 muscle use / retraction, tachycardia, speaking in words.  
23

- 24 - Salbutamol nebulised (repeated at 20 minutes if required)  
25     ○ 2-4 years: 2.5 mg  
26     ○ 5-11 years: 2.5 - 5 mg  
27  
28 - Ipratropium bromide nebulised 250 mcg  
29

30  
31 **Critical:** altered conscious state, maximal work of breathing, marked tachycardia, unable to  
32 talk.  
33

- 34 - Salbutamol nebulised 10 mg (repeated at 5 minutes if required)  
35 - Ipratropium bromide nebulised 250 mcg  
36 - Adrenaline 10 mcg/kg IM (repeated at 5 minutes if required)  
37 - Dexamethasone 0.6 mg/kg IV or oral (max 12 mg)  
38 - Adrenaline IV boluses and infusion (for Mobile Intensive Care Paramedics)  
39  
40  
41  
42  
43  
44  
45  
46  
47  
48  
49  
50  
51  
52  
53  
54  
55  
56  
57  
58  
59  
60

**Table 1.** Demographics and clinical characteristics of children treated or assessed for asthma by AV.

|                                                    | Total<br>(n=1572)  | Escalation<br>of care<br>(n=22) | No<br>escalation<br>of care<br>(n=1550) | P value<br>(escalation<br>vs no<br>escalation) |
|----------------------------------------------------|--------------------|---------------------------------|-----------------------------------------|------------------------------------------------|
| Age, years, n (%)                                  |                    |                                 |                                         |                                                |
| 1-4                                                | 561 (36.3)         | 6 (27.3)                        | 555 (35.8)                              | 0.38                                           |
| 5-11                                               | 690 (43.9)         | 9 (40.9)                        | 681 (43.9)                              |                                                |
| 12-17                                              | 321 (20.4)         | 7 (31.8)                        | 314 (20.3)                              |                                                |
| Median age, years (IQR)                            | 6 (4-10)           | 10.5 (3.8 –<br>14.3)            | 6 (3.8 –<br>10)                         | 0.045                                          |
| Female sex, n (%)                                  | 684 (43.5)         | 11 (50)                         | 877 (43.4)                              | 0.54                                           |
| Pre-existing conditions, n (%)                     |                    |                                 |                                         |                                                |
| Asthma                                             | 1377 (87.6)        | 20 (90.9)                       | 1357<br>(87.5)                          | 0.64                                           |
| Requiring hospital admission                       | 115 (7.3)          | 5 (22.7)                        | 110 (7.1)                               | 0.005                                          |
| Requiring intensive care                           | 63 (4)             | 1 (4.5)                         | 62 (4)                                  | 0.89                                           |
| Requiring intubation                               | 19 (1.2)           | 1 (4.5)                         | 18 (1.2)                                | 0.15                                           |
| With cardiac / respiratory arrest                  | 5 (0.3)            | 0 (0)                           | 5 (0.3)                                 | 0.79                                           |
| Other respiratory illness                          |                    |                                 |                                         |                                                |
| Croup                                              | 94 (6)             | 1 (4.5)                         | 93 (6)                                  | 0.78                                           |
| Bronchiolitis                                      | 80 (5.1)           | 1 (4.5)                         | 79 (5.1)                                | 0.91                                           |
| Pneumonia                                          | 44 (2.8)           | 1 (4.5)                         | 43 (2.8)                                | 0.62                                           |
| Chest infection                                    | 32 (2)             | 1 (4.5)                         | 31 (2)                                  | 0.40                                           |
| Other                                              | 8 (0.5)            | 0 (0)                           | 8 (0.5)                                 | 0.64                                           |
| Initial physiological parameters                   |                    |                                 |                                         |                                                |
| Respiratory rate (breaths/minute),<br>median (IQR) | 32 (24 – 40)       | 35.5 (28 –<br>48.5)             | 32 (24 –<br>40)                         | 0.09                                           |
| Pulse rate (beats/minute), median<br>(IQR)         | 130 (112 –<br>146) | 134.5 (120<br>– 150.5)          | 130 (112<br>– 146)                      | 0.24                                           |
| Initial respiratory status, n (%)                  |                    |                                 |                                         |                                                |
| Normal                                             | 615 (39.1)         | 3 (13.6)                        | 612 (39.5)                              | <0.001                                         |
| Mild respiratory distress                          | 363 (23.1)         | 1 (4.5)                         | 362 (23.4)                              |                                                |
| Moderate respiratory distress                      | 315 (20)           | 2 (9.1)                         | 313 (20.2)                              |                                                |
| Severe respiratory distress                        | 166 (10.6)         | 16 (72.7)                       | 150 (9.7)                               |                                                |
| Depressed respirations                             | 1 (0.1)            | 0 (0)                           | 1 (0.1)                                 |                                                |
| Final physiological parameters                     |                    |                                 |                                         |                                                |

|                                                   |                 |                 |                |        |
|---------------------------------------------------|-----------------|-----------------|----------------|--------|
| Respiratory rate (breaths/minute), median (IQR) † | 28 (22 – 36)    | 28 (22 – 36)    | 30 (27 – 40)   | 0.06   |
| Pulse rate (beats/minute), median (IQR) †         | 126 (108 – 142) | 126 (108 – 142) | 126 (112– 162) | 0.29   |
| Final respiratory status, n (%)‡                  |                 |                 |                |        |
| Normal                                            | 742 (56.8)      | 4 (18.2)        | 738 (57.4)     | <0.001 |
| Mild respiratory distress                         | 400 (30.6)      | 4 (18.2)        | 396 (30.8)     |        |
| Moderate respiratory distress                     | 127 (9.7)       | 6 (27.3)        | 121 (9.4)      |        |
| Severe respiratory distress                       | 38 (2.9)        | 8 (36.4)        | 30 (2.4)       |        |

All P values calculated using Chi-Square tests, except for continuous variables where Mann-Whitney U tests\* were used.

† Data was not available for final pulse rate and respiratory rate for 54 patients in the “No escalation of care” group

‡ Data was not available for final respiratory status for 265 patients in the “No escalation of care” group



**Table 2.** Treatment provided by AV paramedics.

|                                                                                                               | Total<br>(n=1572) | Escalation of<br>care<br>(n=22) | No escalation<br>of care<br>(n=1550) | P value<br>(escalation<br>vs no<br>escalation) |
|---------------------------------------------------------------------------------------------------------------|-------------------|---------------------------------|--------------------------------------|------------------------------------------------|
| Respiratory support, n(%)                                                                                     |                   |                                 |                                      |                                                |
| Bag-valve-mask applied                                                                                        | 1 (0.1)           | 1 (4.5)                         | 0 (0)                                | <0.001                                         |
| Oxygen delivery                                                                                               |                   |                                 |                                      |                                                |
| Nasal cannulae                                                                                                | 46 (2.9)          | 4 (18.2)                        | 42 (2.7)                             | <0.001                                         |
| Nebuliser mask                                                                                                | 258 (16.4)        | 10 (45.5)                       | 248 (16)                             | <0.001                                         |
| Oxygen mask                                                                                                   | 48 (3.1)          | 0 (0)                           | 48 (3.1)                             | 0.40                                           |
| Non-rebreather mask                                                                                           | 8 (0.5)           | 0 (0)                           | 8 (0.5)                              | 0.74                                           |
| Other oxygen therapy<br>(not otherwise specified)                                                             | 2 (0.1)           | 0 (0)                           | 2 (0.1)                              | 0.87                                           |
| Parenteral bronchodilator                                                                                     |                   |                                 |                                      |                                                |
| Adrenaline IM injection                                                                                       | 20 (1.3)          | 20 (90.9)                       | 0 (0)                                | <0.001                                         |
| Adrenaline infusion                                                                                           | 4 (0.3)           | 4 (18.2)                        | 0 (0)                                | <0.001                                         |
| Dexamethasone                                                                                                 |                   |                                 |                                      |                                                |
| IV injection                                                                                                  | 25 (1.6)          | 4 (18.2)                        | 21 (1.4)                             | <0.001                                         |
| Oral                                                                                                          | 141 (9)           | 11 (50)                         | 130 (8.4)                            | <0.001                                         |
| Inhaled bronchodilator                                                                                        |                   |                                 |                                      |                                                |
| Any inhaled bronchodilator                                                                                    | 946 (60.2)        | 21 (95.5)                       | 925 (59.7)                           | <0.001                                         |
| Any Ipratropium bromide<br>nebulisation                                                                       | 453 (28.8)        | 17 (77.3)                       | 436 (28.1)                           | <0.001                                         |
| Any Salbutamol pMDI                                                                                           | 465 (29.6)        | 3 (13.6)                        | 462 (29.8)                           | 0.10                                           |
| Any Salbutamol<br>nebulisation                                                                                | 513 (32.6)        | 20 (90.9)                       | 493 (31.8)                           | <0.001                                         |
| Single administration of<br>inhaled salbutamol                                                                | 348 (22.1)        | 3 (13.6)                        | 345 (22.3)                           |                                                |
| Single administration of<br>inhaled ipratropium bromide                                                       | 13 (0.8)          | 1 (4.5)                         | 12 (0.8)                             |                                                |
| Single administration of<br>inhaled salbutamol and single<br>administration of inhaled<br>ipratropium bromide | 280 (17.8)        | 6 (27.3)                        | 274 (17.7)                           |                                                |
| Two administrations of<br>inhaled salbutamol alone                                                            | 114 (7.3)         | 1 (4.5)                         | 113 (7.3)                            |                                                |
| Two administrations of<br>inhaled salbutamol and at                                                           | 112 (7.1)         | 3 (13.6)                        | 109 (7)                              |                                                |

|                                                                                                            |          |             |           |        |
|------------------------------------------------------------------------------------------------------------|----------|-------------|-----------|--------|
| least one administration of ipratropium bromide                                                            |          |             |           |        |
| Three or more administrations of inhaled salbutamol alone                                                  | 31 (2.0) | 0 (0)       | 31 (2)    |        |
| Three or more administrations of inhaled salbutamol and at least one administration of ipratropium bromide | 48 (3.1) | 7 (31.8)    | 41 (2.6)  |        |
| Total instances of inhaled bronchodilator administration, median (IQR)                                     | 1 (0-2)  | 2 (1.8 – 4) | 1 (0 – 2) | <0.001 |
| Intravenous access                                                                                         |          |             |           |        |
| Intravenous access attempt                                                                                 | 39 (2.5) | 7 (31.8)    | 32 (2.1)  | <0.001 |
| Successful IV attempt                                                                                      | 34 (2.2) | 7 (31.8)    | 27 (1.7)  | <0.001 |

No patients received any of: BIPAP, manual ventilation, mechanical ventilation, IV salbutamol infusion, IM dexamethasone.

**Figure 2.** Initial and final respiratory status documented by AV paramedics.

For peer review only

Note: 111 patients missing initial respiratory status, and 265 missing final respiratory status.

### **Contributorship statement**

SC, CW and FEB identified the research question. SC and CW were responsible for the study design and research protocol. BD and ZN obtained data and input into data cleaning and analysis. SC was responsible for statistical analysis. SC drafted the initial manuscript. SC, BD, ZN, CW, SRD, GMN, CVEP, AG and FEB contributed equally to writing, reviewing and editing the manuscript.

All authors provided comments on the drafts and have read and approved the final version of the article. All authors has full access to all of the data (including statistical reports and tables) at the conclusion of the study and take responsibility for the integrity of the data and the accuracy of the data analysis.

SC is the guarantor for the paper, accepts full responsibility for the work and/or the conduct of the study, had access to the data and controlled the decision to publish.

### **Competing interests**

There are no competing interests for any author.

### **Funding**

SC has received funding from a Thoracic Society of Australia and New Zealand / National Asthma Council Fellowship and the ACEM Foundation Al Spilman Early Career Research Grant 2017.

SRD's time is funded in part by Cure Kids New Zealand

FEB's time was part funded by a grant from the Royal Children's Hospital Foundation, Melbourne, Victoria, Australia; an NHMRC (National Health and Medical Research Council) Practitioner Fellowship; and an NHMRC Investigator Leadership Grant (GNT1171228).

ZN's time is part funded by a grant from the National Heart Foundation of Australia.

### **Data sharing statement**

Data are available on reasonable request. De-identified participant data will be available for sharing from 1 July 2024. Any data access requests should be sent to SC (simon.craig@monash.edu), and should include a proposal from the individual or organisation regarding their plan for use of the data.

The study team will review the request and consider the scientific merit of the proposed use of the data, and the legal, regulatory and ethical issues pertinent to the request. Presuming all constraints are addressed, the data will be shared using a secure file transfer platform.

### **Ethical statement.**

The project was approved by the Royal Children's Hospital Research Ethics and Governance Office, Melbourne, Australia (60707), and the Ambulance Victoria Research Governance Committee, Melbourne, Australia.

## References

1. Alpern ER, Stanley RM, Gorelick MH, et al. Epidemiology of a pediatric emergency medicine research network: the PECARN Core Data Project. *Pediatric emergency care* 2006; **22**(10): 689-99.
2. Acworth J, Babl F, Borland M, et al. Patterns of presentation to the Australian and New Zealand Paediatric Emergency Research Network. *Emerg Med Australas* 2009; **21**(1): 59-66.
3. Weiss AJ, Wier LM, Stocks C, Blanchard J. Overview of Emergency Department Visits in the United States, 2011: Statistical Brief #174. Healthcare Cost and Utilization Project (HCUP) Statistical Briefs. Rockville (MD): Agency for Healthcare Research and Quality (US); 2006.
4. Nath JB, Hsia RY. Children's emergency department use for asthma, 2001-2010. *Academic pediatrics* 2015; **15**(2): 225-30.
5. Kantor DB, Phipatanakul W. Intravenous beta agonists and severe pediatric asthma exacerbation: time for a closer look at terbutaline? *Ann Allergy Asthma Immunol* 2014; **112**(3): 187.
6. Giordano K, Rodriguez E, Green N, et al. Pulmonary Function Tests in Emergency Department Pediatric Patients with Acute Wheezing/Asthma Exacerbation. *Pulmonary Medicine* 2012; **2012**: 724139.
7. Kelly AM, Kerr D, Powell C. Is severity assessment after one hour of treatment better for predicting the need for admission in acute asthma? *Respir Med* 2004; **98**(8): 777-81.
8. Powell CV, Kelly AM, Kerr D. Lack of agreement in classification of the severity of acute asthma between emergency physician assessment and classification using the National Asthma Council Australia guidelines (1998). *Emergency medicine (Fremantle, WA)* 2003; **15**(1): 49-53.
9. O'Connor MG, Saville BR, Hartert TV, Arnold DH. Treatment Variability of Asthma Exacerbations in a Pediatric Emergency Department Using a Severity-Based Management Protocol. *Clinical pediatrics* 2014; **53**(13): 1288-90.
10. Biagini Myers JM, Simmons JM, Kercksmar CM, et al. Heterogeneity in asthma care in a statewide collaborative: the Ohio Pediatric Asthma Repository. *Pediatrics* 2015; **135**(2): 271-9.
11. Morris I, Lyttle MD, O'Sullivan R, Sargant N, Doull IJ, Powell CV. Which intravenous bronchodilators are being administered to children presenting with acute severe wheeze in the UK and Ireland? *Thorax* 2015; **70**(1): 88-91.
12. Craig S, Powell CVE, Nixon GM, et al. Treatment patterns and frequency of key outcomes in acute severe asthma in children: a Paediatric Research in Emergency Departments International Collaborative (PREDICT) multicentre cohort study. *BMJ Open Respir Res* 2022; **9**(1).
13. Monteverde-Fernandez N, Diaz-Rubio F, Vásquez-Hoyos P, Rotta AT, González-Dambruskas S. Variability in care for children with severe acute asthma in Latin America. *Pediatr Pulmonol* 2021; **56**(2): 384-91.
14. Kalburgi S, Halley T. High-Flow Nasal Cannula Use Outside of the ICU Setting. *Pediatrics* 2020; **146**(5).
15. Johnson MD, Zorc JJ, Nelson DS, et al. Intravenous Magnesium in Asthma Pharmacotherapy: Variability in Use in the PECARN Registry. *J Pediatr* 2020; **220**: 165-74.e2.

16. Craig SS, Dalziel SR, Powell CV, Graudins A, Babl FE, Lunny C. Interventions for escalation of therapy for acute exacerbations of asthma in children: an overview of Cochrane Reviews. *Cochrane Database Syst Rev* 2020; **8**: Cd012977.
17. Gray CS, Powell CVE, Babl FE, Dalziel SR, Craig S. Variability of outcome measures in trials of intravenous therapy in acute severe paediatric asthma: a systematic review. *Emerg Med J* 2019; **36**(4): 225-30.
18. Nassif A, Ostermayer DG, Hoang KB, Claiborne MK, Camp EA, Shah MI. Implementation of a Prehospital Protocol Change For Asthmatic Children. *Prehosp Emerg Care* 2018; **22**(4): 457-65.
19. Riney LC, Schwartz H, Murtagh Kurowski E, Collett L, Florin TA. Improving Administration of Prehospital Corticosteroids for Pediatric Asthma. *Pediatr Qual Saf* 2021; **6**(3): e410.
20. Cheetham AL, Navanandan N, Leonard J, Spaur K, Markowitz G, Adalgais KM. Impact of prehospital pediatric asthma management protocol adherence on clinical outcomes. *J Asthma* 2022; **59**(5): 937-45.
21. von Elm E, Altman DG, Egger M, Pocock SJ, Gøtzsche PC, Vandenbroucke JP. The Strengthening the Reporting of Observational Studies in Epidemiology (STROBE) statement: guidelines for reporting observational studies. *Ann Intern Med* 2007; **147**(8): 573-7.
22. Ambulance Victoria. Clinical Practice Guidelines for Ambulance and MICA Paramedics. January 2018. Ambulance Victoria, Doncaster.  
[Online resource: Available from: <https://www.ambulance.vic.gov.au/wp-content/uploads/2019/07/Clinical-Practice-Guidelines-2018-Edition-1.9-1.pdf> Accessed 15/9/2022].
23. Ambulance Victoria Annual report 2019-20. Ambulance Victoria, Melbourne. 2020.  
[Online resource. Available from: <https://www.ambulance.vic.gov.au/about-us/our-performance/> Accessed 15/9/2022].
24. Craig S, Powell CVE, Nixon GM, et al. Treatment patterns and frequency of key outcomes in acute severe asthma in children: a Paediatric Research in Emergency Departments International Collaborative (PREDICT) multicentre cohort study. *BMJ Open Respir Res.* 2022 Mar;9(1):e001137. .
25. Hasegawa K, Craig SS, Teach SJ, Camargo CA Jr. Management of Asthma Exacerbations in the Emergency Department. *J Allergy Clin Immunol Pract.* 2020 Dec 31:S2213-2198(20)31399-4. .
26. Pfeiffer CK, Smith K, Bernard S, et al. Prehospital benzodiazepine use and need for respiratory support in paediatric seizures. *Emerg Med J* 2022; **39**(8): 608-15.
27. Gilbert EH, Lowenstein SR, Koziol-McLain J, Barta DC, Steiner J. Chart reviews in emergency medicine research: Where are the methods? *Ann Emerg Med* 1996; **27**(3): 305-8.
28. Kaji AH, Schriger D, Green S. Looking through the retrospectroscope: reducing bias in emergency medicine chart review studies. *Ann Emerg Med* 2014; **64**(3): 292-8.

1  
2  
3  
4  
5  
6  
7  
8  
9  
10  
11  
12  
13  
14  
15  
16  
17  
18  
19  
20  
21  
22  
23  
24  
25  
26  
27  
28  
29  
30  
31  
32  
33  
34  
35  
36  
37  
38  
39  
40  
41  
42  
43  
44  
45  
46  
47  
48  
49  
50  
51  
52  
53  
54  
55  
56  
57  
58  
59  
60

For peer review only

1  
2  
3  
4  
5  
6  
7  
8  
9  
10  
11  
12  
13  
14  
15  
16  
17  
18  
19  
20  
21  
22  
23  
24  
25  
26  
27  
28  
29  
30  
31  
32  
33  
34  
35  
36  
37  
38  
39  
40  
41  
42  
43  
44  
45  
46  
47  
48  
49  
50  
51  
52  
53  
54  
55  
56  
57  
58  
59  
60

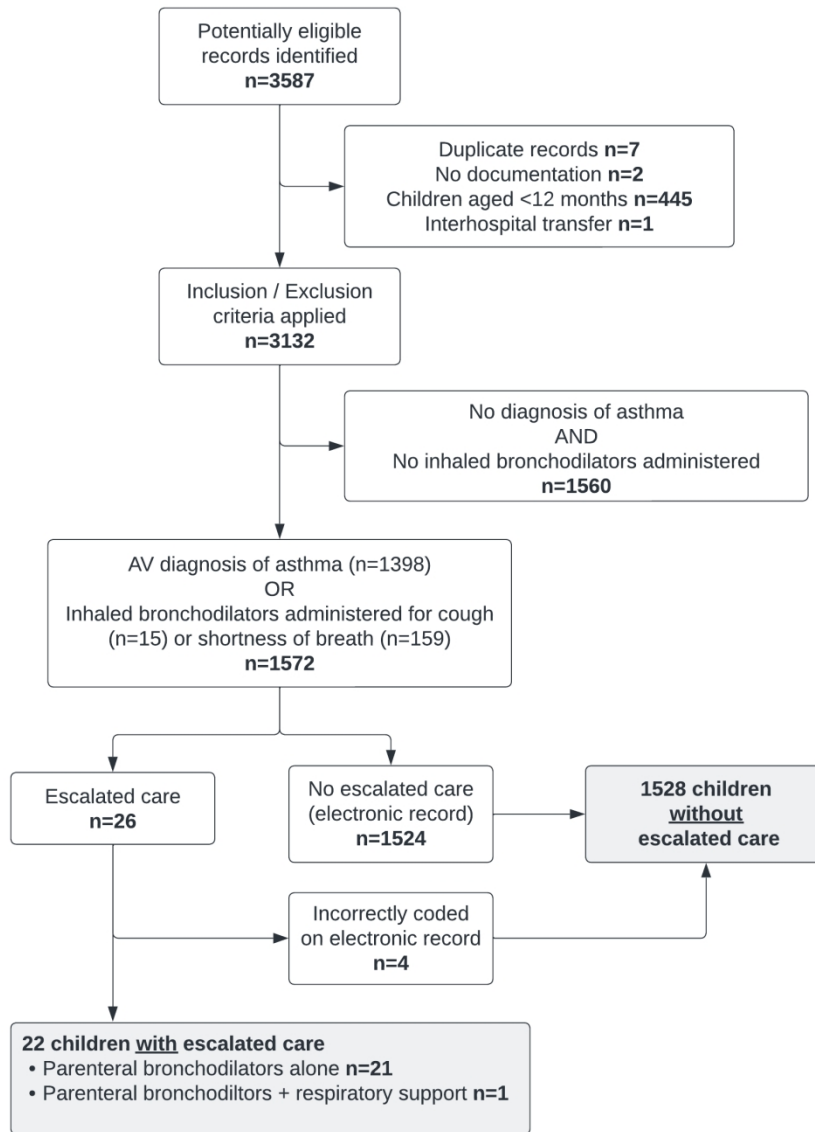

152x205mm (300 x 300 DPI)



1  
2  
3  
4  
5  
6  
7  
8  
9  
10  
11  
12  
13  
14  
15  
16  
17  
18  
19  
20  
21  
22  
23  
24  
25  
26  
27  
28  
29  
30  
31  
32  
33  
34  
35  
36  
37  
38  
39  
40  
41  
42  
43  
44  
45  
46  
47  
48  
49  
50  
51  
52  
53  
54  
55  
56  
57  
58  
59  
60



1328x1387mm (72 x 72 DPI)

**Supplementary Online Table**

## Administration of asthma treatment according to initial respiratory status

|                           | Normal respiratory status or mild respiratory distress (n=978) | Moderate respiratory distress (n=315) | Severe respiratory distress or Depressed respirations (n=167) |
|---------------------------|----------------------------------------------------------------|---------------------------------------|---------------------------------------------------------------|
| Salbutamol (pMDI)         |                                                                |                                       |                                                               |
| n (%)                     | 314 (32.1)                                                     | 111 (35.2)                            | 15 (9.0)                                                      |
| Median (IQR)              | 0 (0 – 1)                                                      | 0 (0 – 1)                             | 0 (0 – 0)                                                     |
| Salbutamol (nebuliser)    |                                                                |                                       |                                                               |
| n (%)                     | 155 (15.8)                                                     | 182 (57.8)                            | 151 (90.4)                                                    |
| Median (IQR)              | 0 (0 – 0)                                                      | 1 (0 – 1)                             | 1 (1 – 2)                                                     |
| Any salbutamol            |                                                                |                                       |                                                               |
| n (%)                     | 455 (46.5)                                                     | 274 (87.0)                            | 157 (94.0)                                                    |
| Median (IQR)              | 0 (0 – 0)                                                      | 1 (0 – 1)                             | 1 (1 – 2)                                                     |
| Ipratropium, n (%)        |                                                                |                                       |                                                               |
| n (%)                     | 125 (12.8)                                                     | 164 (52.1)                            | 144 (86.2)                                                    |
| Median (IQR)              | 0 (0 – 0)                                                      | 1 (0 – 1)                             | 1 (1 – 1)                                                     |
| Dexamethasone (any route) |                                                                |                                       |                                                               |
| Any route, n (%)          | 41 (4.2)                                                       | 56 (17.8)                             | 58 (34.8)                                                     |

## STROBE Statement—checklist of items that should be included in reports of observational studies

|                              | Item No | Recommendation                                                                                                                                                                                                                                                                                                                                                                                                                                                                                                                                                                                                                                                                                                                                          |
|------------------------------|---------|---------------------------------------------------------------------------------------------------------------------------------------------------------------------------------------------------------------------------------------------------------------------------------------------------------------------------------------------------------------------------------------------------------------------------------------------------------------------------------------------------------------------------------------------------------------------------------------------------------------------------------------------------------------------------------------------------------------------------------------------------------|
| <b>Title and abstract</b>    | 1       | (a) Indicate the study's design with a commonly used term in the title or the abstract<br><b>YES – see title.</b>                                                                                                                                                                                                                                                                                                                                                                                                                                                                                                                                                                                                                                       |
|                              |         | (b) Provide in the abstract an informative and balanced summary of what was done and what was found<br><b>Structured abstract provided</b>                                                                                                                                                                                                                                                                                                                                                                                                                                                                                                                                                                                                              |
| <b>Introduction</b>          |         |                                                                                                                                                                                                                                                                                                                                                                                                                                                                                                                                                                                                                                                                                                                                                         |
| Background/rationale         | 2       | Explain the scientific background and rationale for the investigation being reported<br><b>Page 7</b>                                                                                                                                                                                                                                                                                                                                                                                                                                                                                                                                                                                                                                                   |
| Objectives                   | 3       | State specific objectives, including any prespecified hypotheses<br><b>Page 8</b>                                                                                                                                                                                                                                                                                                                                                                                                                                                                                                                                                                                                                                                                       |
| <b>Methods</b>               |         |                                                                                                                                                                                                                                                                                                                                                                                                                                                                                                                                                                                                                                                                                                                                                         |
| Study design                 | 4       | Present key elements of study design early in the paper<br><b>Page 8 – (“study design” section)</b>                                                                                                                                                                                                                                                                                                                                                                                                                                                                                                                                                                                                                                                     |
| Setting                      | 5       | Describe the setting, locations, and relevant dates, including periods of recruitment, exposure, follow-up, and data collection<br><b>Page 8-9 (“study setting” section)</b>                                                                                                                                                                                                                                                                                                                                                                                                                                                                                                                                                                            |
| Participants                 | 6       | (a) <i>Cohort study</i> —Give the eligibility criteria, and the sources and methods of selection of participants. Describe methods of follow-up<br><i>Case-control study</i> —Give the eligibility criteria, and the sources and methods of case ascertainment and control selection. Give the rationale for the choice of cases and controls<br><i>Cross-sectional study</i> —Give the eligibility criteria, and the sources and methods of selection of participants<br>(b) <i>Cohort study</i> —For matched studies, give matching criteria and number of exposed and unexposed<br><i>Case-control study</i> —For matched studies, give matching criteria and the number of controls per case<br><b>Page 9 (“selection of participants” section)</b> |
| Variables                    | 7       | Clearly define all outcomes, exposures, predictors, potential confounders, and effect modifiers. Give diagnostic criteria, if applicable<br><b>Page 9-10 (“data collection” section)</b>                                                                                                                                                                                                                                                                                                                                                                                                                                                                                                                                                                |
| Data sources/<br>measurement | 8*      | For each variable of interest, give sources of data and details of methods of assessment (measurement). Describe comparability of assessment methods if there is more than one group<br><b>Page 9-10 (“data collection” section)</b>                                                                                                                                                                                                                                                                                                                                                                                                                                                                                                                    |
| Bias                         | 9       | Describe any efforts to address potential sources of bias<br><b>Page 10 (end of “data collection” section)</b>                                                                                                                                                                                                                                                                                                                                                                                                                                                                                                                                                                                                                                          |
| Study size                   | 10      | Explain how the study size was arrived at<br><b>Page 10 (“analysis” section)</b>                                                                                                                                                                                                                                                                                                                                                                                                                                                                                                                                                                                                                                                                        |
| Quantitative variables       | 11      | Explain how quantitative variables were handled in the analyses. If applicable, describe which groupings were chosen and why<br><b>Page 10 (“analysis” section)</b>                                                                                                                                                                                                                                                                                                                                                                                                                                                                                                                                                                                     |

|                     |     |                                                                                                                                                                                                                                                                                                                                                                                                                                                                                                                                                                                                                                   |
|---------------------|-----|-----------------------------------------------------------------------------------------------------------------------------------------------------------------------------------------------------------------------------------------------------------------------------------------------------------------------------------------------------------------------------------------------------------------------------------------------------------------------------------------------------------------------------------------------------------------------------------------------------------------------------------|
| Statistical methods | 12  | <p>(a) Describe all statistical methods, including those used to control for confounding</p> <p>(b) Describe any methods used to examine subgroups and interactions</p> <p>(c) Explain how missing data were addressed</p> <p>(d) <i>Cohort study</i>—If applicable, explain how loss to follow-up was addressed</p> <p><i>Case-control study</i>—If applicable, explain how matching of cases and controls was addressed</p> <p><i>Cross-sectional study</i>—If applicable, describe analytical methods taking account of sampling strategy</p> <p>(e) Describe any sensitivity analyses</p> <p>Page 10 (“analysis” section)</p> |
| <b>Results</b>      |     |                                                                                                                                                                                                                                                                                                                                                                                                                                                                                                                                                                                                                                   |
| Participants        | 13* | <p>(a) Report numbers of individuals at each stage of study—eg numbers potentially eligible, examined for eligibility, confirmed eligible, included in the study, completing follow-up, and analysed Page 10-11 (“results” section)</p> <p>(b) Give reasons for non-participation at each stage Page 10-11 (“results” section)</p> <p>(c) Consider use of a flow diagram – See figure 1</p>                                                                                                                                                                                                                                       |
| Descriptive data    | 14* | <p>(a) Give characteristics of study participants (eg demographic, clinical, social) and information on exposures and potential confounders</p> <p>Page 10-11 (“results” section) and table 1</p> <p>(b) Indicate number of participants with missing data for each variable of interest</p> <p>Missing data indicated in Table 1, and mentioned in limitations section</p> <p>(c) <i>Cohort study</i>—Summarise follow-up time (eg, average and total amount)</p> <p>Not applicable (no patient follow-up)</p>                                                                                                                   |
| Outcome data        | 15* | <p><i>Cohort study</i>—Report numbers of outcome events or summary measures over time</p> <p><i>Case-control study</i>—Report numbers in each exposure category, or summary measures of exposure</p> <p><i>Cross-sectional study</i>—Report numbers of outcome events or summary measures</p> <p>Table 2, Figure 2 and results (page 10-12)</p>                                                                                                                                                                                                                                                                                   |
| Main results        | 16  | <p>(a) Give unadjusted estimates and, if applicable, confounder-adjusted estimates and their precision (eg, 95% confidence interval). Make clear which confounders were adjusted for and why they were included</p> <p>(b) Report category boundaries when continuous variables were categorized</p> <p>(c) If relevant, consider translating estimates of relative risk into absolute risk for a meaningful time period</p> <p>Table 2, Figure 2 and results (page 10-12)</p>                                                                                                                                                    |
| Other analyses      | 17  | <p>Report other analyses done—eg analyses of subgroups and interactions, and sensitivity analyses</p> <p>Not applicable. No subgroup analyses performed</p>                                                                                                                                                                                                                                                                                                                                                                                                                                                                       |
| <b>Discussion</b>   |     |                                                                                                                                                                                                                                                                                                                                                                                                                                                                                                                                                                                                                                   |
| Key results         | 18  | <p>Summarise key results with reference to study objectives</p> <p>Page 13-14</p>                                                                                                                                                                                                                                                                                                                                                                                                                                                                                                                                                 |
| Limitations         | 19  | <p>Discuss limitations of the study, taking into account sources of potential bias or imprecision. Discuss both direction and magnitude of any potential bias</p> <p>Page 14-15</p>                                                                                                                                                                                                                                                                                                                                                                                                                                               |

1  
2  
3  
4  
5  
6  
7  
8  
9  
10  
11  
12  
13  
14  
15  
16  
17  
18  
19  
20  
21  
22  
23  
24  
25  
26  
27  
28  
29  
30  
31  
32  
33  
34  
35  
36  
37  
38  
39  
40  
41  
42  
43  
44  
45  
46  
47  
48  
49  
50  
51  
52  
53  
54  
55  
56  
57  
58  
59  
60

|                |    |                                                                                                                                                                                                 |
|----------------|----|-------------------------------------------------------------------------------------------------------------------------------------------------------------------------------------------------|
| Interpretation | 20 | Give a cautious overall interpretation of results considering objectives, limitations, multiplicity of analyses, results from similar studies, and other relevant evidence<br><b>Page 13-15</b> |
|----------------|----|-------------------------------------------------------------------------------------------------------------------------------------------------------------------------------------------------|

|                  |    |                                                                                            |
|------------------|----|--------------------------------------------------------------------------------------------|
| Generalisability | 21 | Discuss the generalisability (external validity) of the study results<br><b>Page 13-15</b> |
|------------------|----|--------------------------------------------------------------------------------------------|

---

#### **Other information**

---

|         |    |                                                                                                                                                                                                      |
|---------|----|------------------------------------------------------------------------------------------------------------------------------------------------------------------------------------------------------|
| Funding | 22 | Give the source of funding and the role of the funders for the present study and, if applicable, for the original study on which the present article is based<br><b>Funding disclosures provided</b> |
|---------|----|------------------------------------------------------------------------------------------------------------------------------------------------------------------------------------------------------|

\*Give information separately for cases and controls in case-control studies and, if applicable, for exposed and unexposed groups in cohort and cross-sectional studies.

**Note:** An Explanation and Elaboration article discusses each checklist item and gives methodological background and published examples of transparent reporting. The STROBE checklist is best used in conjunction with this article (freely available on the Web sites of PLoS Medicine at <http://www.plosmedicine.org/>, Annals of Internal Medicine at <http://www.annals.org/>, and Epidemiology at <http://www.epidem.com/>). Information on the STROBE Initiative is available at [www.strobe-statement.org](http://www.strobe-statement.org).

## STROBE Statement—checklist of items that should be included in reports of observational studies

|                              | Item No | Recommendation                                                                                                                                                                                                                                                                                                                                                                                                                                                                                                                                                                                                                                                                                                                                          |
|------------------------------|---------|---------------------------------------------------------------------------------------------------------------------------------------------------------------------------------------------------------------------------------------------------------------------------------------------------------------------------------------------------------------------------------------------------------------------------------------------------------------------------------------------------------------------------------------------------------------------------------------------------------------------------------------------------------------------------------------------------------------------------------------------------------|
| <b>Title and abstract</b>    | 1       | (a) Indicate the study's design with a commonly used term in the title or the abstract<br><b>YES – see title.</b>                                                                                                                                                                                                                                                                                                                                                                                                                                                                                                                                                                                                                                       |
|                              |         | (b) Provide in the abstract an informative and balanced summary of what was done and what was found<br><b>Structured abstract provided</b>                                                                                                                                                                                                                                                                                                                                                                                                                                                                                                                                                                                                              |
| <b>Introduction</b>          |         |                                                                                                                                                                                                                                                                                                                                                                                                                                                                                                                                                                                                                                                                                                                                                         |
| Background/rationale         | 2       | Explain the scientific background and rationale for the investigation being reported<br><b>Page 7</b>                                                                                                                                                                                                                                                                                                                                                                                                                                                                                                                                                                                                                                                   |
| Objectives                   | 3       | State specific objectives, including any prespecified hypotheses<br><b>Page 8</b>                                                                                                                                                                                                                                                                                                                                                                                                                                                                                                                                                                                                                                                                       |
| <b>Methods</b>               |         |                                                                                                                                                                                                                                                                                                                                                                                                                                                                                                                                                                                                                                                                                                                                                         |
| Study design                 | 4       | Present key elements of study design early in the paper<br><b>Page 8 – (“study design” section)</b>                                                                                                                                                                                                                                                                                                                                                                                                                                                                                                                                                                                                                                                     |
| Setting                      | 5       | Describe the setting, locations, and relevant dates, including periods of recruitment, exposure, follow-up, and data collection<br><b>Page 8-9 (“study setting” section)</b>                                                                                                                                                                                                                                                                                                                                                                                                                                                                                                                                                                            |
| Participants                 | 6       | (a) <i>Cohort study</i> —Give the eligibility criteria, and the sources and methods of selection of participants. Describe methods of follow-up<br><i>Case-control study</i> —Give the eligibility criteria, and the sources and methods of case ascertainment and control selection. Give the rationale for the choice of cases and controls<br><i>Cross-sectional study</i> —Give the eligibility criteria, and the sources and methods of selection of participants<br>(b) <i>Cohort study</i> —For matched studies, give matching criteria and number of exposed and unexposed<br><i>Case-control study</i> —For matched studies, give matching criteria and the number of controls per case<br><b>Page 9 (“selection of participants” section)</b> |
| Variables                    | 7       | Clearly define all outcomes, exposures, predictors, potential confounders, and effect modifiers. Give diagnostic criteria, if applicable<br><b>Page 9-10 (“data collection” section)</b>                                                                                                                                                                                                                                                                                                                                                                                                                                                                                                                                                                |
| Data sources/<br>measurement | 8*      | For each variable of interest, give sources of data and details of methods of assessment (measurement). Describe comparability of assessment methods if there is more than one group<br><b>Page 9-10 (“data collection” section)</b>                                                                                                                                                                                                                                                                                                                                                                                                                                                                                                                    |
| Bias                         | 9       | Describe any efforts to address potential sources of bias<br><b>Page 10 (end of “data collection” section)</b>                                                                                                                                                                                                                                                                                                                                                                                                                                                                                                                                                                                                                                          |
| Study size                   | 10      | Explain how the study size was arrived at<br><b>Page 10 (“analysis” section)</b>                                                                                                                                                                                                                                                                                                                                                                                                                                                                                                                                                                                                                                                                        |
| Quantitative variables       | 11      | Explain how quantitative variables were handled in the analyses. If applicable, describe which groupings were chosen and why<br><b>Page 10 (“analysis” section)</b>                                                                                                                                                                                                                                                                                                                                                                                                                                                                                                                                                                                     |

1  
2  
3  
4  
5  
6  
7  
8  
9  
10  
11  
12  
13  
14  
15  
16  
17  
18  
19  
20  
21  
22  
23  
24  
25  
26  
27  
28  
29  
30  
31  
32  
33  
34  
35  
36  
37  
38  
39  
40  
41  
42  
43  
44  
45  
46  
47  
48  
49  
50  
51  
52  
53  
54  
55  
56  
57  
58  
59  
60

|                     |     |                                                                                                                                                                                                                                                                                                                                                                                                                                                                                                                                                                                                                             |
|---------------------|-----|-----------------------------------------------------------------------------------------------------------------------------------------------------------------------------------------------------------------------------------------------------------------------------------------------------------------------------------------------------------------------------------------------------------------------------------------------------------------------------------------------------------------------------------------------------------------------------------------------------------------------------|
| Statistical methods | 12  | <p>(a) Describe all statistical methods, including those used to control for confounding</p> <p>(b) Describe any methods used to examine subgroups and interactions</p> <p>(c) Explain how missing data were addressed</p> <p>(d) <i>Cohort study</i>—If applicable, explain how loss to follow-up was addressed<br/><i>Case-control study</i>—If applicable, explain how matching of cases and controls was addressed<br/><i>Cross-sectional study</i>—If applicable, describe analytical methods taking account of sampling strategy</p> <p>(e) Describe any sensitivity analyses</p> <p>Page 10 (“analysis” section)</p> |
| <b>Results</b>      |     |                                                                                                                                                                                                                                                                                                                                                                                                                                                                                                                                                                                                                             |
| Participants        | 13* | <p>(a) Report numbers of individuals at each stage of study—eg numbers potentially eligible, examined for eligibility, confirmed eligible, included in the study, completing follow-up, and analysed Page 10-11 (“results” section)</p> <p>(b) Give reasons for non-participation at each stage Page 10-11 (“results” section)</p> <p>(c) Consider use of a flow diagram – See figure 1</p>                                                                                                                                                                                                                                 |
| Descriptive data    | 14* | <p>(a) Give characteristics of study participants (eg demographic, clinical, social) and information on exposures and potential confounders<br/>Page 10-11 (“results” section) and table 1</p> <p>(b) Indicate number of participants with missing data for each variable of interest<br/>Not applicable (no missing data) Missing data indicated in Table 1, and mentioned in limitations section</p> <p>(c) <i>Cohort study</i>—Summarise follow-up time (eg, average and total amount)<br/>Not applicable (no patient follow-up)</p>                                                                                     |
| Outcome data        | 15* | <p><i>Cohort study</i>—Report numbers of outcome events or summary measures over time</p> <p><i>Case-control study</i>—Report numbers in each exposure category, or summary measures of exposure</p> <p><i>Cross-sectional study</i>—Report numbers of outcome events or summary measures<br/>Table 2, Figure 2 and results (page 10-12)</p>                                                                                                                                                                                                                                                                                |
| Main results        | 16  | <p>(a) Give unadjusted estimates and, if applicable, confounder-adjusted estimates and their precision (eg, 95% confidence interval). Make clear which confounders were adjusted for and why they were included</p> <p>(b) Report category boundaries when continuous variables were categorized</p> <p>(c) If relevant, consider translating estimates of relative risk into absolute risk for a meaningful time period<br/>Table 2, Figure 2 and results (page 10-12)</p>                                                                                                                                                 |
| Other analyses      | 17  | <p>Report other analyses done—eg analyses of subgroups and interactions, and sensitivity analyses</p> <p>Not applicable. No subgroup analyses performed</p>                                                                                                                                                                                                                                                                                                                                                                                                                                                                 |
| <b>Discussion</b>   |     |                                                                                                                                                                                                                                                                                                                                                                                                                                                                                                                                                                                                                             |
| Key results         | 18  | <p>Summarise key results with reference to study objectives<br/>Page 13-14</p>                                                                                                                                                                                                                                                                                                                                                                                                                                                                                                                                              |
| Limitations         | 19  | <p>Discuss limitations of the study, taking into account sources of potential bias or imprecision. Discuss both direction and magnitude of any potential bias<br/>Page 14-15</p>                                                                                                                                                                                                                                                                                                                                                                                                                                            |

|    |                          |                                                                                                  |
|----|--------------------------|--------------------------------------------------------------------------------------------------|
| 1  |                          |                                                                                                  |
| 2  |                          |                                                                                                  |
| 3  | Interpretation           | 20                                                                                               |
| 4  |                          | Give a cautious overall interpretation of results considering objectives, limitations,           |
| 5  |                          | multiplicity of analyses, results from similar studies, and other relevant evidence              |
| 6  |                          | <a href="#">Page 13-15</a>                                                                       |
| 7  | Generalisability         | 21                                                                                               |
| 8  |                          | Discuss the generalisability (external validity) of the study results                            |
| 9  |                          | <a href="#">Page 13-15</a>                                                                       |
| 10 | <b>Other information</b> |                                                                                                  |
| 11 | Funding                  | 22                                                                                               |
| 12 |                          | Give the source of funding and the role of the funders for the present study and, if applicable, |
| 13 |                          | for the original study on which the present article is based                                     |
| 14 |                          | <a href="#">Funding disclosures provided</a>                                                     |

15

16 \*Give information separately for cases and controls in case-control studies and, if applicable, for exposed and

17 unexposed groups in cohort and cross-sectional studies.

18

19

20 **Note:** An Explanation and Elaboration article discusses each checklist item and gives methodological background and

21 published examples of transparent reporting. The STROBE checklist is best used in conjunction with this article (freely

22 available on the Web sites of PLoS Medicine at <http://www.plosmedicine.org/>, Annals of Internal Medicine at

23 <http://www.annals.org/>, and Epidemiology at <http://www.epidem.com/>). Information on the STROBE Initiative is

24 available at [www.strobe-statement.org](http://www.strobe-statement.org).

25

26

27

28

29

30

31

32

33

34

35

36

37

38

39

40

41

42

43

44

45

46

47

48

49

50

51

52

53

54

55

56

57

58

59

60
