# Supplementary material for: Acute paediatric asthma treatment in the prehospital setting: a retrospective observational study
Source: PubMed Central journal article supplement — BMJ Open. 2023 Jun 22;13(6):e073029. doi: 10.1136/bmjopen-2023-073029 (PMC10314617; doi:10.1136/bmjopen-2023-073029), 2023-06-22
Supplement: bmjopen-2023-073029supp001.pdf [file bmjopen-2023-073029supp001.pdf]

**Supplementary Online Table**

Administration of asthma treatment according to initial respiratory status

|                           | Normal respiratory status or mild respiratory distress (n=978) | Moderate respiratory distress (n=315) | Severe respiratory distress or Depressed respirations (n=167) |
|---------------------------|----------------------------------------------------------------|---------------------------------------|---------------------------------------------------------------|
| Salbutamol (pMDI)         |                                                                |                                       |                                                               |
| n (%)                     | 314 (32.1)                                                     | 111 (35.2)                            | 15 (9.0)                                                      |
| Median (IQR)              | 0 (0 – 1)                                                      | 0 (0 – 1)                             | 0 (0 – 0)                                                     |
| Salbutamol (nebuliser)    |                                                                |                                       |                                                               |
| n (%)                     | 155 (15.8)                                                     | 182 (57.8)                            | 151 (90.4)                                                    |
| Median (IQR)              | 0 (0 – 0)                                                      | 1 (0 – 1)                             | 1 (1 – 2)                                                     |
| Any salbutamol            |                                                                |                                       |                                                               |
| n (%)                     | 455 (46.5)                                                     | 274 (87.0)                            | 157 (94.0)                                                    |
| Median (IQR)              | 0 (0 – 0)                                                      | 1 (0 – 1)                             | 1 (1 – 2)                                                     |
| Ipratropium, n (%)        |                                                                |                                       |                                                               |
| n (%)                     | 125 (12.8)                                                     | 164 (52.1)                            | 144 (86.2)                                                    |
| Median (IQR)              | 0 (0 – 0)                                                      | 1 (0 – 1)                             | 1 (1 – 1)                                                     |
| Dexamethasone (any route) |                                                                |                                       |                                                               |
| Any route, n (%)          | 41 (4.2)                                                       | 56 (17.8)                             | 58 (34.8)                                                     |
